# Supplementary material
Source: PubMed Central journal article supplement (PMC1310578)
Supplement: plntphys_pp.105.070466_1.pdf [file plntphys_pp.105.070466_1.pdf]

SCR1

TaTIL-1 1 MAA---K---KSGS-----EMGVVGLDVARYMGRWYEIASFFNFQFPRDGRQTRATYELMDDGATVHVHNETWTSK-  
HvTIL-1 1 MAV---K---KIGS-----EMGVVGLDVARYMGRWYEIASFFNFQFPRDGRQTRATYELMDDGATVHVHNETWTSK-  
OsTIL-1 1 MAAAIVEK---KSGS-----EMTVVRGLDVARYMGRWYEIASFFNFQFPRDGRQTRATYELMDDGATVHVHNETWTSK-  
ZmTIL-1 1 MAEEGEK---AKSGG---GQOMTVVRGLDVARYMGRWYEIASFFNFQFPRDGRQTRATYELMDDGATVHVHNETWTSK-  
SbTIL-1 1 MAEAGKTTAATKSGG---GQIMTVVRGLDVARYMGRWYEIASFFNFQFPRDGRQTRATYELMDDGATVHVHNETWTSK-  
SoTIL 1 MAAEAGK---SGG-----QMTVVRGLDVARYMGRWYEIASFFNFQFPRDGRQTRATYELMDDGATVHVHNETWTSK-  
TaTIL-2 1 ---MAAMKVVNLDLERYMGRWYEIACFPSRFQPKDGANTRATYTLGFDG-AVKVHNETWTD-  
HvTIL-2 1 ---MAAMKVVNLDLERYMGRWYEIACFPSRFQPKDGANTRATYTLGFDG-AVKVHNETWTD-  
ZmTIL-2 1 ---MAMQVVENLDLERYMGRWYEIACFPSRFQPKDGANTRATYTLGFDG-AVKVHNETWTD-  
SbTIL-2 1 ---MA---AAAMRVVRLDLERYMGRWYEIACFPSRFQPKDGANTRATYTLGFDG-AVKVHNETWTD-  
OsTIL-2 1 ---MKVVVENLDLERYMGRWYEIACFPSRFQPKDGANTRATYTLGFDG-AVKVHNETWTD-  
McTIL 1 ---MAQK---AKEMVVVGLDLERYMGRWYEIASFFNFQFPRDGRQTRATYELMDDGATVHVHNETWTSK-  
McTIL' 1 ---MAHK---SKEMVVVGLDLERYMGRWYEIASFFNFQFPRDGRQTRATYELMDDGATVHVHNETWTSK-  
GmTIL 1 ---MA---NKEMVVVGLDLERYMGRWYEIASFFNFQFPRDGRQTRATYELMDDGATVHVHNETWTSK-  
GmTIL' 1 ---MA---NNEMQVVRGLDLERYMGRWYEIASFFNFQFPRDGRQTRATYELMDDGATVHVHNETWTSK-  
PrpTIL 1 ---MA---KKTMDVVKGLDLERYMGRWYEIASFFNFQFPRDGRQTRATYELMDDGATVHVHNETWTSK-  
PaTIL 1 ---MA---KKTMDVVKGLDLERYMGRWYEIASFFNFQFPRDGRQTRATYELMDDGATVHVHNETWTSK-  
MtTIL 1 ---MA---NKEMDVVARGVLDLERYMGRWYEIACFPSRFQPKDGANTRATYTLGFDG-AVKVHNETWTD-  
VvTIL 1 ---MA---KKEMEVVGLDLERYMGRWYEIASFFNFQFPRDGRQTRATYELMDDGATVHVHNETWTSK-  
LsTIL 1 ---MS---KKEMEVVGLDLERYMGRWYEIASFFNFQFPRDGRQTRATYELMDDGATVHVHNETWTSK-  
AtTIL 1 ---MTE---KKEMEVVGLDLERYMGRWYEIASFFNFQFPRDGRQTRATYELMDDGATVHVHNETWTSK-  
BnTIL 1 ---MTTE---KKEMEVVGLDLERYMGRWYEIASFFNFQFPRDGRQTRATYELMDDGATVHVHNETWTSK-  
LeTIL 1 ---MA---TKVMEVVKNLDLERYMGRWYEIASFFNFQFPRDGRQTRATYELMDDGATVHVHNETWTSK-  
StTIL' 1 ---MA---TKVMEVVKNLDLERYMGRWYEIASFFNFQFPRDGRQTRATYELMDDGATVHVHNETWTSK-  
LeTIL 1 ---MT---TKEMEVVKNLDLERYMGRWYEIASFFNFQFPRDGRQTRATYELMDDGATVHVHNETWTSK-  
StTIL 1 ---MT---TKEMEVVKNLDLERYMGRWYEIASFFNFQFPRDGRQTRATYELMDDGATVHVHNETWTSK-  
GaTIL 1 ---MS---QKTMDEVVKNLDLERYMGRWYEIASFFNFQFPRDGRQTRATYELMDDGATVHVHNETWTSK-  
PbTIL' 1 ---MA---TKKEMEVVGVLDLERYMGRWYEIASFFNFQFPRDGRQTRATYELMDDGATVHVHNETWTSK-  
PotxPotrTIL 1 ---MA---TKKEMEVVGVLDLERYMGRWYEIASFFNFQFPRDGRQTRATYELMDDGATVHVHNETWTSK-  
PotTIL 1 ---MA---TKKEMEVVGVLDLERYMGRWYEIASFFNFQFPRDGRQTRATYELMDDGATVHVHNETWTSK-  
PbTIL 1 ---MA---TKKEMEVVGVLDLERYMGRWYEIASFFNFQFPRDGRQTRATYELMDDGATVHVHNETWTSK-  
MtTIL' 1 ---MGNTVGVKDEEVVKNLDLERYMGRWYEIASFFNFQFPRDGRQTRATYELMDDGATVHVHNETWTSK-  
CsTIL 1 ---MAS---KKEMEVVGLDLERYMGRWYEIASFFNFQFPRDGRQTRATYELMDDGATVHVHNETWTSK-  
GaTIL' 1 ---MA---MEVVKNLDLERYMGRWYEIASFFNFQFPRDGRQTRATYELMDDGATVHVHNETWTSK-  
PtTIL 1 ---MG---KEDLVVVKGLDLERYMGRWYEIASFFNFQFPRDGRQTRATYELMDDGATVHVHNETWTSK-  
PpTIL 1 ---MGG---EKDINVVQVNDLERYMGRWYEIASFFNFQFPRDGRQTRATYELMDDGATVHVHNETWTSK-  
TrTIL 1 ---MGG---EKDINVVQVNDLERYMGRWYEIASFFNFQFPRDGRQTRATYELMDDGATVHVHNETWTSK-

SCR2

SCR3

TaTIL-1 66 G--KRDYIEGTAYKADPASDEAKLKVVFYVPPFLPIIPVVGDYWVLYDDDYQYALVGEPRRKSLLWILCRKTHIEEEVYN  
HvTIL-1 66 G--KRDYIEGTAYKADPASDEAKLKVVFYVPPFLPIIPVVGDYWVLYDDDYQYALVGEPRRKSLLWILCRKTHIEEEVYN  
OsTIL-1 71 G--KRDYIEGTAYKADPASDEAKLKVVFYVPPFLPIIPVVGDYWVLYDDDYQYALVGEPRRKSLLWILCRKTHIEEEVYN  
ZmTIL-1 74 G--KRDYIEGTAYKADPASDEAKLKVVFYVPPFLPIIPVVGDYWVLYDDDYQYALVGEPRRKSLLWILCRKTHIEEEVYN  
SbTIL-1 77 G--KRDYIEGTAYKADPASDEAKLKVVFYVPPFLPIIPVVGDYWVLYDDDYQYALVGEPRRKSLLWILCRKTHIEEEVYN  
SoTIL 69 G--KRDYIEGTAYKADPASDEAKLKVVFYVPPFLPIIPVVGDYWVLYDDDYQYALVGEPRRKSLLWILCRKTHIEEEVYN  
TaTIL-2 59 G--RRGHEGTAFRADPAGDEAKLKVRFYVPPFLPIIPVVGDYWVLYDDDYQYALVGEPRRKSLLWILCRKTHIEEEVYN  
HvTIL-2 59 G--RRGHEGTAFRADPAGDEAKLKVRFYVPPFLPIIPVVGDYWVLYDDDYQYALVGEPRRKSLLWILCRKTHIEEEVYN  
ZmTIL-2 58 G--RRGHEGTAFRADPAGDEAKLKVRFYVPPFLPIIPVVGDYWVLYDDDYQYALVGEPRRKSLLWILCRKTHIEEEVYN  
SbTIL-2 62 GGGRRGHEGTAFRADPAGDEAKLKVRFYVPPFLPIIPVVGDYWVLYDDDYQYALVGEPRRKSLLWILCRKTHIEEEVYN  
OsTIL-2 56 G--RRGHEGTAFRADPAGDEAKLKVVFYVPPFLPIIPVVGDYWVLYDDDYQYALVGEPRRKSLLWILCRKTHIEEEVYN  
McTIL 63 G--KRSYIEGTAYKADPNSEAKLKVVFYVPPFLPIIPVVGDYWVLYDDDYQYALVGEPRRKSLLWILCRKTHIEEEVYN  
McTIL' 63 G--KRDYIEGTAYKADPKSDEAKLKVVFYVPPFLPIIPVVGDYWVLYDDDYQYALVGEPRRKSLLWILCRKTHIEEEVYN  
GmTIL 61 G--KRGYIEGTAYKADPKSDEAKLKVVFYVPPFLPIIPVVGDYWVLYDDDYQYALVGEPRRKSLLWILCRKTHIEEEVYN  
GmTIL' 61 G--KRGYIEGTAYKADPKSDEAKLKVVFYVPPFLPIIPVVGDYWVLYDDDYQYALVGEPRRKSLLWILCRKTHIEEEVYN  
PrpTIL 61 G--KRSYIEGTAYKADPNSEAKLKVVFYVPPFLPIIPVVGDYWVLYDDDYQYALVGEPRRKSLLWILCRKTHIEEEVYN  
PaTIL 61 G--KRSYIEGTAYKADPNSEAKLKVVFYVPPFLPIIPVVGDYWVLYDDDYQYALVGEPRRKSLLWILCRKTHIEEEVYN  
MtTIL 61 G--KRSYIEGTAYKADPNSEAKLKVVFYVPPFLPIIPVVGDYWVLYDDDYQYALVGEPRRKSLLWILCRKTHIEEEVYN  
VvTIL 62 G--KRSYIEGTAYKADPKSDAKLKVVFYVPPFLPIIPVVGDYWVLYDDDYQYALVGEPRRKSLLWILCRKTHIEEEVYN  
LsTIL 61 G--KRGYIEGTAYKADPKSDEAKLKVVFYVPPFLPIIPVVGDYWVLYDDDYQYALVGEPRRKSLLWILCRKTHIEEEVYN  
AtTIL 62 G--KRGYIEGTAYKADPKSDEAKLKVVFYVPPFLPIIPVVGDYWVLYDDDYQYALVGEPRRKSLLWILCRKTHIEEEVYN  
BnTIL 63 G--KRGYIEGTAYKADPKSDEAKLKVVFYVPPFLPIIPVVGDYWVLYDDDYQYALVGEPRRKSLLWILCRKTHIEEEVYN  
LeTIL 61 G--KRGYIEGTAYKADPNSEAKLKVVFYVPPFLPIIPVVGDYWVLYDDDYQYALVGEPRRKSLLWILCRKTHIEEEVYN  
StTIL' 61 G--KRGYIEGTAYKADPNSEAKLKVVFYVPPFLPIIPVVGDYWVLYDDDYQYALVGEPRRKSLLWILCRKTHIEEEVYN  
LeTIL 61 G--KRSYIEGTAYKADPKSDEAKLKVVFYVPPFLPIIPVVGDYWVLYDDDYQYALVGEPRRKSLLWILCRKTHIEEEVYN  
StTIL 61 G--KRSYIEGTAYKADPKSDEAKLKVVFYVPPFLPIIPVVGDYWVLYDDDYQYALVGEPRRKSLLWILCRKTHIEEEVYN  
GaTIL 61 G--KRGYIEGTAYKADPNSEAKLKVVFYVPPFLPIIPVVGDYWVLYDDDYQYALVGEPRRKSLLWILCRKTHIEEEVYN  
PbTIL' 62 G--KRSYIEGTAYKADPNSEAKLKVVFYVPPFLPIIPVVGDYWVLYDDDYQYALVGEPRRKSLLWILCRKTHIEEEVYN  
PotxPotrTIL 62 G--KRSYIEGTAYKADPNSEAKLKVVFYVPPFLPIIPVVGDYWVLYDDDYQYALVGEPRRKSLLWILCRKTHIEEEVYN  
PotTIL 62 G--KRSYIEGTAYKADPNSEAKLKVVFYVPPFLPIIPVVGDYWVLYDDDYQYALVGEPRRKSLLWILCRKTHIEEEVYN  
PbTIL 62 G--KRGYIEGTAYKADPNSEAKLKVVFYVPPFLPIIPVVGDYWVLYDDDYQYALVGEPRRKSLLWILCRKTHIEEEVYN  
MtTIL' 64 G--KRSYIEGTAYKADPKSDEAKLKVVFYVPPFLPIIPVVGDYWVLYDDDYQYALVGEPRRKSLLWILCRKTHIEEEVYN  
CsTIL 62 G--KRSYIEGTAYKADPKSDEAKLKVVFYVPPFLPIIPVVGDYWVLYDDDYQYALVGEPRRKSLLWILCRKTHIEEEVYN  
GaTIL' 56 G--KRSYIEGTAYKADPKSDEAKLKVVFYVPPFLPIIPVVGDYWVLYDDDYQYALVGEPRRKSLLWILCRKTHIEEEVYN  
PtTIL 61 G--KRSYIEGTAYKADPKSDEAKLKVVFYVPPFLPIIPVVGDYWVLYDDDYQYALVGEPRRKSLLWILCRKTHIEEEVYN  
PpTIL 62 G--KRSYIEGTAYKADPNSEAKLKVVFYVPPFLPIIPVVGDYWVLYDDDYQYALVGEPRRKSLLWILCRKTHIEEEVYN  
TrTIL 62 N--KRSYIEGTAYKADPNSEAKLKVVFYVPPFLPIIPVVGDYWVLYDDDYQYALVGEPRRKSLLWILCRKTHIEEEVYN

|                    |     |                              |        |       |     |               |
|--------------------|-----|------------------------------|--------|-------|-----|---------------|
| <i>TaTIL-1</i>     | 144 | QLLEKAKEEGYDVAKLHKTPQSDPPPE  | ---    | TAAPT | D   | SKGTWWEKSLFGK |
| <i>HvTIL-1</i>     | 144 | QLLEKAKEEGYDVAKLHKTPQSDPPPE  | G---   | TAAPT | D   | SKGAWWEKSLFGK |
| <i>OsTIL-1</i>     | 149 | RLLEKAKEEGYDVEKLRKTPQDDPPPE  | S---   | TAAPT | D   | TKGTWWEKSLFGK |
| <i>ZmTIL-1</i>     | 152 | QLVERAKEEGYDVSKLHRTPODDPPPE  | S---   | TAAPT | D   | TKGVWWEKSLFGK |
| <i>SbTIL-1</i>     | 155 | QLVERAKEEGYDVSKLHRTPODDPPPE  | S---   | TAAPT | D   | TKGVWWEKSLFGK |
| <i>SoTIL</i>       | 147 | QLVERAKEEGYDVSKLHRTPODDPPPE  | S---   | TAAPT | D   | TKGVWWEKSLFGK |
| <i>TaTIL-2</i>     | 137 | ELVERAKEEGYDVSKLRKTEPEPE     | ---    | QDAPK | D   | GGLWWEKSLFGK  |
| <i>HvTIL-2</i>     | 137 | ELVERAKEEGYDVSKLRRTBHPPE     | ---    | QDAPK | D   | GGLWWEKSLFGK  |
| <i>ZmTIL-2</i>     | 136 | ELVERAKEEGYDVSKLRKTAHPDPPPE  | S---   | EQSPR | D   | GGMWWEKSLFGK  |
| <i>SbTIL-2</i>     | 142 | ELVERAKEEGYDVSKLRKTAHPDPPPE  | S---   | EQSPG | D   | RGVWWEKSLFGK  |
| <i>OsTIL-2</i>     | 134 | QLVERAKEEGYDVSKLKTAHPDPPPE   | T---   | EQSAG | D   | RGVWWEKSLFGK  |
| <i>McTIL</i>       | 141 | ELVQKAKEEGYDVNKLHKTPQADPPPE  | G---   | NQAPD | D   | TKGVWWEKSLFGK |
| <i>McTIL'</i>      | 141 | ELVQKAKEEGYDVKKLHKTPQADPPPE  | S---   | QTPK  | D   | KGGWWEKSLFGK  |
| <i>GmTIL</i>       | 139 | QLVQRAKENVGYDVSKLRKTPQSDPPPE | ---    | EEGPD | D   | TKGIWWEKSLFGK |
| <i>GmTIL'</i>      | 139 | KLVRQAKENVGYDVSKLHKTPQSDPPPE | ---    | EEGPD | D   | TKGIWWEKSLFGK |
| <i>PrpTIL</i>      | 139 | QLVQRAKDEEYDVSKLHKTPQSETPPE  | G---   | EEGPD | D   | TKGIWWEKSLFGK |
| <i>PaTIL</i>       | 139 | QLVQRAKDEEYDVSKLHKTPQSETPPE  | G---   | EEGPD | D   | TKGIWWEKSLFGK |
| <i>MtTIL</i>       | 139 | ELVQKAKEEGYDVSKLRKTPQSDTPPE  | ---    | QEGPD | D   | TKGIWWEKSLFGK |
| <i>VvTIL</i>       | 140 | MLVEKAKEVGYDVSKLRKTPQIDPPPE  | ---    | GEGPD | D   | TKGIWWEKSLFGK |
| <i>LsTIL</i>       | 139 | QLVQKATDEEYDVSKLKTPQTEPPPE   | S---   | EDAPD | D   | TKGIWWEKSLFGK |
| <i>AtTIL</i>       | 140 | QLVEKAKEEGYDTSKLRKTPQSDTPPE  | S---   | NTAPD | D   | SKGVWWEKSLFGK |
| <i>BnTIL</i>       | 141 | QLVEKAKEEGYDVSKLRKTAQSDTPPE  | S---   | TAAPD | D   | TKGIWWEKSLFGK |
| <i>LeTIL</i>       | 139 | QLVEKAKEEGYDVSKLHKTPQSDSPPPE | S---   | EDSPK | D   | TKGIWWEKSLFGK |
| <i>StTIL'</i>      | 139 | QLVEKAKEEGYDVSKLHKTPQSDSPPPE | S---   | EDSPD | D   | TKGIWWEKSLFGK |
| <i>LeTIL'</i>      | 139 | QLVEKAKEVGYDVSKLHKTPQADPPP   | G---   | EDAPK | D   | TKGFWWEKSLFGK |
| <i>StTIL</i>       | 139 | QLVEKAKEVGYDVSKLHKTPQADPPP   | G---   | EDAPK | D   | TKGIWWEKSLFGK |
| <i>GaTIL</i>       | 139 | QLVQKAKDEEYDVSKLHKTPQSDPPPE  | G---   | DDTPK | D   | AKGIWWEKSLFGK |
| <i>PbTIL'</i>      | 140 | QLVEKAKEEGYDVGKLRKTPQIDPPPE  | ---    | EEGPD | D   | TKGIWWEKSLFGK |
| <i>PotxPotrTIL</i> | 140 | QLVEKAKEEGYDVGKLRKTPQIDPPPE  | ---    | EEGPD | D   | TKGIWWEKSLFGK |
| <i>PotTIL</i>      | 140 | QLVEKAKEEGYDVGKLRKTPQIDPPPE  | ---    | EEGPD | D   | TKGIWWEKSLFGK |
| <i>PbTIL</i>       | 140 | QLVEKAKEEGYDVEKLRKTPQIDPPPE  | ---    | EEGPD | D   | TKGIWWEKSLFGK |
| <i>MtTIL'</i>      | 142 | QLVEKAKEEGYDVSKLHKTPQSDPPPE  | ---    | ---   | --- | ---           |
| <i>CsTIL</i>       | 140 | QLVEKATSEGYDVSKLHRTPOSDNPPEA | ---    | EESPD | D   | TKGIWWEKSLFGK |
| <i>GaTIL'</i>      | 134 | MLEQKAKELGYDVSKLHKTPQSDSTPE  | G---   | BHVPD | D   | KGFWWEKSLFGK  |
| <i>PtTIL</i>       | 139 | RLLEHARQEGYDVGRKLRKTPQND     | PE---  | TEAPK | D   | KGFWWEKSLFGK  |
| <i>PpTIL</i>       | 140 | QLLEHAFNEGYDVSKLHKTPQIPEI    | EGTSEN | SENTD | --- | RAGVWWEKSLFGK |
| <i>TrTIL</i>       | 140 | ELVEHAANEYDVSKLHKTPQNPVGE    | ---    | GEEST | D   | RAGAWWEKSLFGK |

Supplemental Figure 1. Alignment of the deduced amino acid sequences of TIL lipocalins. Identical residues are in black and similar residues are in grey. The three SCRs that provide a signature for the lipocalins are indicated above. Conserved N-glycosylation sites are in pink. Putative cleavage sites with a DGPI score over 0.700 are in red with yellow letters.

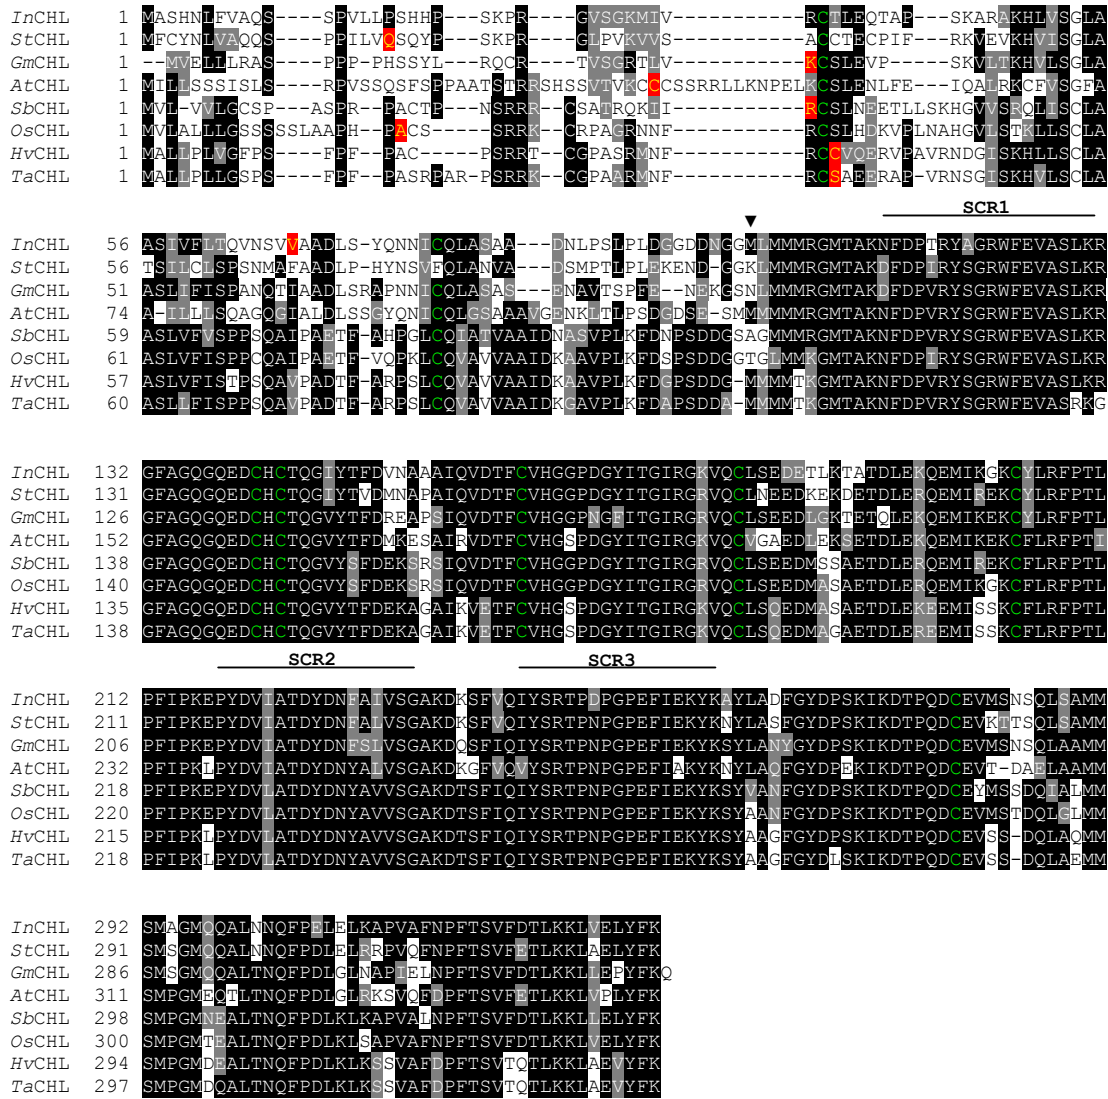

Supplemental Figure 2. Alignment of the deduced amino acid sequences of CHL lipocalins. Identical residues are in black and similar residues are in grey. The three SCRs that provide a signature for the lipocalins are indicated above. Conserved cysteine residues are in green. Putative chloroplastic transit peptide cleavage sites identified with Signal P / ChloroP software are in red with yellow letters. The triangle indicates the putative chloroplastic transit peptide cleavage site based on sequence comparison.

```

NtVDE      1  --MAIASPISNPLANHEITIKYYVGSKLPGHKRFPSWGWEYDFGSIIVVAKIISRRIPRYF--RKSPICCGLDSSRGLQIFSH
CsVDE      1  --MAIASADITLINDGSSIGCARRQLT-CERLRRRVADPC-CVNVNKMQPNRRIPKYFGLLRSYRMPCCGLESKYSNLISC
LsVDE      1  --MAISLSTVFLCKEAIINLYARSPCN--ERFHRSGQPPT-NIIMMKIRSN--GYFN--SFLRTFTYKTSFSDSSH
AtVDE      1  --MAWATICFTSPCHRRIRFFSSDDGIG--RLGITRKRIN-GTFLKILPPIQS-----ADLRTTGGSSRFLSAFRS
SoVDE      1  --MAIVARSICVSYDEIAGCENNVSHR--NFKKWVQWKNPFLFQDDARRNIR--FN--DRRLSCTKFIGASEKLQH
OsVDE_jap  1  --MAARPEVVSALSPPAGG-----GAMG-----GVRVYRRCQ-----PRAYLWRKGDHLPVHHA
OsVDE_ind  1  --MAARPEVVSALSPPAGG-----GAMG-----GVRVYRRCQ-----PRAYLWRKGDHLPVHHA
TaVDE      1  MLPRQCFKHVFPREGSSSSLHGPGSR-----GAGSRGRT-TLNFHRC-----VRLSLWR-TDHLHS--

```

```

NtVDE      77  GKHNLSPAHSINONVPKNGSGC--KFPKDVALLMWEKQGFAKTAIVAFIISVASKADAVDALKTCCTLLKECRFLAK
CsVDE      77  GSMKISSVCENSTSIPEEKGIF--EFQMEVIMSVIK--SQLIRVAAVMACIFLVIPADAVDALKTCSELLKECGVELAK
LsVDE      70  CKDK-SQICSIDAFSFEIQR-F--DLKRGMTLILEKQWRQFIQLAIVLVGTFVIVPRVDAVDALKTCACLLKECRIELAK
AtVDE      69  GFSK--GIFDIIVP-LPSKN-----ELKELTAPILLK-----LVGVLAQAFLVVPSADAVDALKTCACLLKECRIELAK
SoVDE      69  SKSPKSGLISCGWEVNSKVVSNVHPKKNVLLKIK---VVEVTAIVACTFFVMSAQAVDALKTCCTLLKECRIELAK
OsVDE_jap  48  KISARCSSEIKAHIVLQASDALS--STREWSRSHLVT-----MTGLVACAVLVVPSADAVDALKTCCTLLKECRIELAK
OsVDE_ind  48  KIPARCSSEIKVHTVLOASDALS--STREWSRSHLVT-----MTGLVACAVLVVPSADAVDALKTCCTLLKECRIELAK
TaVDE      58  --TARSSPKVHLLQVPDFVN--TKSWSKLQVLT-----VTGLAACVVLVPSAGATDALKTCCTLLKECRIELAK

```

**Cysteine-Rich N-Terminal Region**

```

NtVDE      155  IISNPAscnCAANVACLQTCNNRPDETEscnCQIKGDLFENSVDVEFNECAVSRKKCVPRKSDVGFPPVPDPS-VLVQKFDMDKF
CsVDE      153  IANPSCAANVACLQTCNNRPDETEscnCQIKGDLFENSVDVEFNECAVSRKKCVPRKSDVGEFPPVPDPN-VLVRNFMNMF
LsVDE      146  IANPSCAANVACLQTCNNRPDETEscnCQIKGDLFENSVDVDFNECAVSRKKCVPRKSDVGEFPPVPRN-AVVONFMNMF
AtVDE      134  IANPSCAANVACLQTCNNRPDETEscnCQIKGDLFENSVDVEFNECAVSRKKCVPRKSDLGEFFAPDPS-VLVQNFNIDF
SoVDE      145  IANPSCAANVACLQTCNNRPDETEscnCQIKGDLFANRVVDFNECAVSRKKCVPRKSDVGEFPPVPDPS-VLVSFNMAF
OsVDE_jap  119  IANPSCAANVACLNTCNNRPDETEscnCQIKGDLFENVVDFNECAVSRKKCVPRKSDVGEFPPVPDPS-ALVKNFMMAF
OsVDE_ind  119  IANPSCAANVACLNTCNNRPDETEscnCQIKGDLFENVVDFNECAVSRKKCVPRKSDVGEFPPVPDPS-ALVKNFMMAF
TaVDE      127  IANPSCAANVACLNTCNNRPDETEscnCQIKGDLFENSVDVEFNECAVSRKKCVPRKSDVGEFPPVPDPS-ALVKNFMMAF

```

```

NtVDE      234  SGKWIITRGLNPTFDADFscnQLHEFHTE--ENKLVGNLWRIKTPDGGFFTRSAVQKQFVQDPKYPGILYNHDNEYLLHYQDDW
CsVDE      232  SGKWIITRGLNPTFDADFscnQLHEFHME--SNKLLGNLWRIKTPDGGFFTRSAVQRFVQDPTQPAILYNHDNEYLHYQDDW
LsVDE      225  SGKWIITRGLNPTFDADFscnQLHEFHME--NDKLVGNLWRIKTLDDGGFFTRSAVQTFVQDPTDPAAILYNHDNEYLHYQDDW
AtVDE      213  NGKWIITRGLNPTFDADFscnQLHEFHTEGDNKLGNLWRIKTLDSGGFFTRSAVQKQFVQDENQPGILYNHDNEYLHYQDDW
SoVDE      224  NGKWIISGLNPTFDADFscnQLHEFHLE--DGKLVGNLWRIKTPDGGFFTRIAVQKFAQDPSQPGMLYNHDNAYLHYQDDW
OsVDE_jap  198  NGKWIISGLNPTFDscnDFCQLHEFRVE--GDKLLANLWRIKTPDGGFFTRIAQRFVQDPAQPAAILYNHDNEYLHYQDDW
OsVDE_ind  198  NGKWIISGLNPTFDscnDFCQLHEFRVE--GDKLLANLWRIKTPDGGFFTRIAQRFVQDPAQPAAILYNHDNEYLHYQDDW
TaVDE      206  RGKWIISGLNPTFDscnDFCQLHEFRLE--GDRLLVANLWRIKTPDGGFFTRGAVQRFVQDSSQPAAILYNHDNEYLHYQDDW

```

**SCR3**

```

NtVDE      313  YILSSKVENSPEDYIFVYYKGRNDAWDGYGGSVLYTRSAVLPESIIPELQTAQKVGGRDFNFIFIKTDNTCGPEPPLVERL
CsVDE      311  YILSSKIENKPPDYIFVYYRGRNDAWDGYGGAscnVYTRSAVLPENSIIPELEKAAQSVGRDFSKFIRTDNSCGPEPPLVERL
LsVDE      304  YILSSKIENKPPDYIFVYYRGRNDAWDGYGGSVLYTRSPscnTLPESSIIPELQKAAKSVGRDFNFIITDNSCGPEPPLVERL
AtVDE      293  YILSSKIENKPPDYIFVYYRGRNDAWDGYGGAscnVYTRSSVLPENSIIPELEKAAKSVGRDFSTFIRTDNTCGPEPPLVERI
SoVDE      303  YILSSKIENKPPDYIFVYYRGRNDAWDGYGGAscnVYTRSATVPEINIVPELNRAAQSVGKDFNKFIRTDNTCGPEPPLVERI
OsVDE_jap  277  YILSSKVENKEDDYIFVYYRGRNDAWDGYGGAscnVYTRSKVPESIVPELERAAKSVGRDFSTFIRTDNTCGPEPPLVERI
OsVDE_ind  277  YILSSKVENKEDDYIFVYYRGRNDAWDGYGGAscnVYTRSKVPESIVPELERAAKSVGRDFSTFIRTDNTCGPEPPLVERI
TaVDE      285  YILSSKIENKDDYIFVYYRGRNDAWDGYGGAscnVYTRSKLPEIIVPELERAscnTKSVGRDFSTFIRTDNTCGPEPPLAscnRI

```

**Glutamic Acid-Rich C-Terminal Region**

```

NtVDE      393  EKKVEEGEITIIIEV---EEIEVEVEKVRDKEVTLFSKLEEGEKELIQDEENFLRELSKEEMDVLDELKMEATEVEKLF
CsVDE      391  EKTVEEGEITIIIEV---EEIEGEVEKT---EMNLGRLLEGFKELQDEENFLRELSKEEMDILSELKMEASEVEKLF
LsVDE      384  EKTVEEGEKLIIIEAVEIEVEVEKEVscnRDTEMTLFCRLLEGFKELQDEENFVRELSKEEKELNLEOMEATEVEKLF
AtVDE      373  EKTVEEGEITIIIEVEVEIEVEVEKVEKscnVRTEMTLFCRLLEGFENELKQDEENFVRELSKEEMEFLDELKMEASEVEKLF
SoVDE      383  EKTVEEGEITIIIEVEQIEGEIEGscnLEKVGKTEMTLFCRLLEGFKELIQDEEYFLKELNKEERELLEDLKMEAGEVEKLF
OsVDE_jap  357  EKTVEQGEKTIIEVEVEIEGEIEGEVKELEEEVTLFCRLTDGLMEVVKQDLNMFQGLSKEEMELLDOMNMEATEVEKVF
OsVDE_ind  357  EKTVEQGEKTIIEVEVEIEGEIEGEVKELEEEVTLFCRLTDGLMEVVKQDLNMFQGLSKEEMELLDOMNMEATEVEKVF
TaVDE      365  EKTVEKGEKLIIEVEVEIEGEIEGEVKELEEEVTLFCRLTDGLMIEVVKQDVMNMFQGLSKEEMELLDQNLMEATEVEKLF

```

```

NtVDE      469  GRALPIRKLRL
CsVDE      464  QALPIRKLRL
LsVDE      464  GRALPIRKLRL
AtVDE      453  GKALPIRKLVR
SoVDE      463  GRALPIRKLRL
OsVDE_jap  437  SRALPIRKLRL
OsVDE_ind  437  SRALPIRKLRL
TaVDE      445  SRSLPIRKLRL

```

Supplemental Figure 3. Alignment of the deduced amino acid sequences of VDE proteins. Identical residues are in black and similar residues are in grey. The SCRs that provide a signature for the lipocalins, the cysteine-rich N-terminal region and the glutamic acid-rich C-terminal region are indicated above. Conserved N-glycosylation sites are in pink. Conserved cysteine residues are in green. Conserved glutamic acid residues and other charged residues are in turquoise. The triangle indicates the chloroplastic transit peptide cleavage site.

*AtZEP\_col* 1 -MGSTPFYCYSINPSPSKLDFTRTHVFSFVSKQFYLDLSSFSFGKPGG---VSGFR---SRRALI-----GVKA  
*AtZEP\_?* 1 -MGSTPFYCYSINPSPSKLDFTRTHVFSFVSKQFYLDLSSFSFGKPGG---VSGFR---SRRALI-----GVKA  
*AtZEP\_1er* 1 -MGSTPFYCYSINPSPSKLDFTRTHVFSFVAKQFYLDLSSFSFGSRSGGG---LSVFR---SRKTLI-----GVKA  
*CuZEP* 1 -MVSSEMFYNSVN--LSTAVFSRTHFFVYVYKHSCLIEFSRYDHCINYK---FRTGT-SGQSKNPT-----QVKA  
*PaZEP* 1 -MASTLIFYNSMN--LSAAVFSRTHFFPIPNKDFPLEFSPCHTD-YH---LRSRTRSGQKCLT-----EYVA  
*NtZEP* 1 -MYSTVIFYTSVHP--STSASFRRKQPLLLSKDFEPTELYHSLFCS-RS---LENGQ--IKKVKGV-----VKA  
*NpZEP* 1 -MYSTVIFYTSVHP--STSASFRRKQPLLLSKDFEPTELYHSLFCS-RS---LENGQ--IKKVKGV-----VKA  
*CaZEP* 1 -MYASSARDGTPG--KWCNARRKQPLLLSKDFEPTELYHSLFCS--KS---LENGH--IKKVKGV-----VKA  
*LeZEP* 1 -MYSTVIFYTSVHP--STSASVLRKQPLLLSKDFEPTELYHSLFCS--RS---LENGH--INKVKGV-----KVKA  
*OsZEP* 1 ----MALLSATAE-----AKTFEFLFSHEAQQHPHPAASACCGG---GASGK---RQARA-----RVAA  
*CrZEP* 1 MLASTYTPCGVRQVAGRTVAVPSSLVAVAVAVARSLLGLAPYVFCPEPS---AALPACQQPSGR-----RHVQT  
*CspZEP* 1 --MHARSSLGPRARAG-ARAPAVCHVAALACRPAASLPPQFLCATISNSAGSARAAAMPQQGRGLGSLVRCPTTFVAT

### ADP-binding site

*AtZEP\_col* 61 ATALVEKEE-KREAVT-----EKKKKSRVLVAGGGIGGLVFALAAKKKGFVFLVFEKDLSAIRGEGKYRGPPIQIQSNA  
*AtZEP\_?* 61 ATALVEKEE-KREAVT-----DKKKKSRVLVAGGGIGGLVFALAAKKKGFVFLVFEKDLSAIRGEGKYRGPPIQIQSNA  
*AtZEP\_1er* 62 ATALVEKEE-KREAVT-----EKKKK-SRVLVAGGGIGGLVFALAAKKKGFVFLVFEKDLSAIRGEGKYRGPPIQIQSNA  
*CuZEP* 62 AVA---ESE--TNNSDS-----ENKK-LRLLVAGGGIGGLVFALAAKKKGFVFLVFEKDLSAIRGEGQYRGPPIQIQSNA  
*PaZEP* 62 TVASPTVEE-SAPAST-----QPKK-LRLLVAGGGIGGLVFALAAKKKGFVFLVFEKDLSAIRGEGQYRGPPIQIQSNA  
*NtZEP* 59 TIAEAPATT-PPTDLK-----KVPQKKLKVLVAGGGIGGLVFALAAKKKGFVFLVFERDLSAIRGEGQYRGPPIQIQSNA  
*NpZEP* 59 TIAEAPATI-PPTDLK-----KVPQKKLKVLVAGGGIGGLVFALAAKKKGFVFLVFERDLSAIRGEGQYRGPPIQIQSNA  
*CaZEP* 59 TIAEAPATE--TEKSNS-----EVPQKKLKVLVAGGGIGGLVFALAAKKKGFVFLVFERDLSAIRGEGQYRGPPIQIQSNA  
*LeZEP* 59 TIAEAPVTE--TEKTDGANGDLKVPQKKLKVLVAGGGIGGLVFALAAKKKGFVFLVFERDLSAIRGEGQYRGPPIQIQSNA  
*OsZEP* 52 AMRPADAASVAQAASPGGG--GEGTRRFRVLVAGGGIGGLVLAALAAKRGYEVTVFERDLSAIRGEGQYRGPPIQIQSNA  
*CrZEP* 65 AATLRADNESSVAQLVH-----QNGKPKMKVITAGAGIGGLVLAVALIKQGFVQVFERDLSAIRGEGKYRGPPIQIQSNA  
*CspZEP* 78 RASSVASAEASQPPAAD-----SMKRPLRVLVAGAGIGGLVLAVALIKKGFHVTVFERDLSAIRGEGKYRGPPIQIQSNA

### SCR1

*AtZEP\_col* 133 LAALEAIDIEVAEVOVMBAGCITGDRINGLVDGISGTYWVKFDTFTPAASRGLPVTRVISRMTLQOILARAV---GEDVI  
*AtZEP\_?* 133 LAALEAIDIEVAEVOVMBAGCITGDRINGLVDGISGTYWVKFDTFTPAAGTGLPVTRVISRMTLQOILARAV---GEDVI  
*AtZEP\_1er* 133 LAALEAIDIEVAEVOVMBAGCITGDRINGLVDGISGTYWVKFDTFTPAASRGLPVTRVISRMTLQOILARAV---GEDVI  
*CuZEP* 130 LAALEAIDIDVAEEVMBAGCITGDRINGLVDGISGTYWVKFDTFTPAAEKGLPVTRVISRMTLQOILARAV---GEDII  
*PaZEP* 133 LAALEAIDMDVAEEVMBAGCITGDRINGLVDGISGTYWVKFDTFTPAVERGLPVTRVISRMTLQOILARAV---GEEII  
*NtZEP* 132 LAALEAIDMDVAEIMNAGCITGDRINGLVDGISGTYWVKFDTFTPAVERGLPVTRVISRMTLQOILARAV---GEDII  
*NpZEP* 132 LAALEAIDMDVAEIMNAGCITGDRINGLVDGISGTYWVKFDTFTPAVERGLPVTRVISRMTLQOILARAV---GEDII  
*CaZEP* 130 LAALEAIDMDVAEIMNAGCITGDRINGLVDGISGTYWVKFDTFTPAVERGLPVTRVISRMTLQOILARAV---GEDVI  
*LeZEP* 138 LAALEAIDIDVAEIMNAGCITGDRINGLVDGISGTYWVKFDTFTPAVERGLPVTRVISRMTLQOILARAV---GEEII  
*OsZEP* 130 LAALEAIDMSVAEEVMBAGCITGDRINGLVDGISGTYWVKFDTFTPAERGLPVTRVISRMTLQOILARAV---GEDAI  
*CrZEP* 139 LAALEAIDIEVAEVEVREGCITGDRINGLVDGISGTYWVKFDTFTPAVSKGLPVTRVISRMTLQOILARAVERYGGPGTI  
*CspZEP* 152 LGALEAIDPSIAEVMDEGCITGDRINGLVDGISGTYWVKFDTFTPAVSKGLPVTRVISRMTLQOILARAVLYRGGPGTI

*AtZEP\_col* 209 RNESNVVDFED-----SGDKVTVLENGQRYEGDLLVGADGIWSKVRNLFGRSEATYSGYTCYTGIADFIPADIESVVG  
*AtZEP\_?* 209 RNESNVVDFED-----SGDKVTVLENGQRYEGDLLVGADGIWSKVRNLFGRSEATYSGYTCYTGIADFIPADIESVVG  
*AtZEP\_1er* 209 RNESNVVDFED-----SGDKVTVLENGQRYEGDLLVGADGIWSKVRNLFGRSEATYSGYTCYTGIADFIPADIESVVG  
*CuZEP* 206 LNESNVVDFED-----HGDKVTVLENGQRYAGDLLVGADGIWSKVRNLFGRSEATYSGYTCYTGIADFVPADIESVVG  
*PaZEP* 209 LNESNVVDFED-----LGDKNVTVLENGQRYEGDLLVGADGIWSKVRNLFGRSEATYSGYTCYTGIADFVPADIESVVG  
*NtZEP* 208 RNESNVVDFED-----DGEKVTVLENGQRYEGDLLVGADGIWSKVRNLFGRSEATYSGYTCYTGIADFVPADIESVVG  
*NpZEP* 208 RNESNVVDFED-----DGEKVTVLENGQRYEGDLLVGADGIWSKVRNLFGRSEATYSGYTCYTGIADFVPADIESVVG  
*CaZEP* 206 RNESNVVDFED-----DGEKVTVLENGQRYEGDLLVGADGIWSKVRNLFGRSEATYSGYTCYTGIADFVPADIESVVG  
*LeZEP* 214 RNESNVVDFED-----DGEKVTVLENGQRYEGDLLVGADGIWSKVRNLFGRSEATYSGYTCYTGIADFVPADIESVVG  
*OsZEP* 206 LNESNVVDFED-----DGNKVTVLENGQRYEGDLLVGADGIWSKVRNLFGRSEATYSGYTCYTGIADFVPADIESVVG  
*CrZEP* 219 QNGCVVTEFERRRNDTTGNNEVTVQLEDGRTEADVLVGADGIWSKVRNLFGRSEATYSGYTCYTGIADFVPADIESVVG  
*CspZEP* 232 MSNSHVVDFED-----SNNEVSVTLENGQRYEGDLLVGADGIWSKVRNLFGRSEATYSGYTCYTGIADFVPADIESVVG

*AtZEP\_col* 283 YRVFLGHKQYFVSSDVGGGKMOWYAFHNEPAGGADAPNGMKRRLFEIFDQWCDNVLDLLHATEEEAILRRDIYDRPPTFTS  
*AtZEP\_?* 283 YRVFLGHKQYFVSSDVGGGKMOWYAFHNEPAGGADAPNGMKRRLFEIFDQWCDNVLDLLHATEEEAILRRDIYDRPPTFTS  
*AtZEP\_1er* 283 YRVFLGHKQYFVSSDVGGGKMOWYAFHNEPAGGADAPNGMKRRLFEIFDQWCDNVLDLLHATEEEAILRRDIYDRPPTFTS  
*CuZEP* 280 YRVFLGHKQYFVSSDVGAGKMOWYAFHNEPAGGADAPNGMKRRLFEIFDQWCDNVLDLLHATEEEAILRRDIYDRPPTFTS  
*PaZEP* 283 YRVFLGHKQYFVSSDVGGGKMOWYAFHNEPAGGADAPNGKRRLLKIFEGWCDNVLDLLHATEEEAILRRDIYDRPPTFTS  
*NtZEP* 282 YRVFLGHKQYFVSSDVGGGKMOWYAFHNEPAGGADAPNGKRRLLKIFEGWCDNVLDLLHATEEEAILRRDIYDRPPTFTS  
*NpZEP* 282 YRVFLGHKQYFVSSDVGGGKMOWYAFHNEPAGGADAPNGKRRLLKIFEGWCDNVLDLLHATEEEAILRRDIYDRPPTFTS  
*CaZEP* 280 YRVFLGHKQYFVSSDVGGGKMOWYAFHNEPAGGADAPNGKRRLLKIFEGWCDNVLDLLHATEEEAILRRDIYDRPPTFTS  
*LeZEP* 288 YRVFLGHKQYFVSSDVGGGKMOWYAFHNEPAGGADAPNGKRRLLKIFEGWCDNVLDLLHATEEEAILRRDIYDRPPTFTS  
*OsZEP* 280 YRVFLGHKQYFVSSDVGAGKMOWYAFHNEPAGGADAPNGKRRLLKIFEGWCDNVLDLLHATEEEAILRRDIYDRPPTFTS  
*CrZEP* 299 YRVFLGNGQYFVSSDVGNKMQWYGFHKEPAGGADDPNGKRRLLKIFEGWCDNVLDLLHATEEEAILRRDIYDRPPTFTS  
*CspZEP* 306 YRVFLGNSQYFVSSDVGGGKMOWYGFHKEPAGGADDPBGQRKRRLLKIFEGWCDNVLDLLHATEEEAILRRDIYDRPPTFTS

## FAD-binding site

```

AtZEP_col 363 WGKGRVTLTGDSIHAMQPNMGQGGMAIEDSFQLALELDEAWKQSVETTPVDVVSLLKRYEESRRLRVAIIHAMARMAA
AtZEP_? 363 WGKGRVTLTGDSIHAMQPNMGQGGMAIEDSFQLALELDEAWKQSVETTPVDVVSLLKRYEESRRLRVAIIHAMARMAA
AtZEP_1er 363 WGKGRVTLTGDSIHAMQPNMGQGGMAIEDSFQLALELDEAWKQSVETTPVDVVSLLKRYEESRRLRVAIIHAMARMAA
CuZEP 360 WGRGRVTLTGDSVHAMQPNLQGGGMAIEDGYQLALELEKACKKSNESEKTPIDIVSALKSYERARRLRVAIIHGLARSA
PaZEP 363 WGKGRVTLTGDSVHAMQPNMGQGGMAIEDGYQLALELDKAWKKSSEETGTPVDVASSLRSYENSRLRVAIIHGMAARMAA
NtZEP 362 WGKGRVTLTGDSVHAMQPNLQGGGMAIEDSYQLALELDKALSRSAESGTPVDIISLRSYESSRRLRVGVIHGLARMAA
NpZEP 362 WGKGRVTLTGDSVHAMQPNLQGGGMAIEDSYQLALELDKALSRSAESGTPVDIISLRSYESSRRLRVGVIHGLARMAA
CaZEP 360 WGKGRVTLTGDSVHAMQPNLQGGGMAIEDSYQLALELEKAWSRSAESGTPVDIISLRSYESSRRLRVGVIHGLARMAA
LeZEP 368 WGRGRVTLTGDSVHAMQPNLQGGGMAIEDSYQLALELEKACSRSAEFGSPVDIISLRSYESSRRLRVGVIHGLARMAA
OsZEP 360 WGKGRVTLTGDSVHAMQPNLQGGGMAIEDGYQLALELEKAWQESAKSGTPVDIISLRSYESSRRLRVGVIHGLARMAA
CrZEP 379 WSKGRVTLTGDSVHAMQPNLQGGGMAIEDAYFLAIDLSRAVSDKAGNAADVVEGLRYSQDSRRLRVSAIHGMAGMAA
CspZEP 386 WSEGRVTLTGDSVHAMQPNLQGGGMAIEDAYFLANNLSDMDAAGCQPAHLDVKKLFSITYQSHRMIRASAIHGMAGMAA

```

```

AtZEP_col 443 IMASTYKAYLGVGLG-PLSFLLTKFRVPHPRVGGRRFFVDIAMPMSMLDWVLGGNSEKLG-GRPPSRLIDK----ADDRLR
AtZEP_? 443 IMASTYKAYLGVGLG-PLSFLLTKFRVPHPRVGGRRFFVDIAMPMSMLDWVLGGNSEKLG-GRPPSRLIDK----ADDRLR
AtZEP_1er 443 IMASTYKAYLGVGLG-PLSFLLTKFRVPHPRVGGRRFFVDIAMPMSMLDWVLGGNSEKLG-GRPPSRLIDK----ADDRLR
CuZEP 440 IMASTYKAYLGVGLG-PLSFLLTKFRVPHPRVGGRRFFIDLAMPMLMSWVLGGNSKLE-GRSPCRLSDK----ASDNL
PaZEP 443 IMASTYKAYLGVGLG-PLSFLLTKFRVPHPRVGGRRFFIDLAMPMLMSWVLGGNSKLE-GRSPSRLSDK----ASDQL
NtZEP 442 IMASTYKAYLGVGLG-PLSFLLTKFRVPHPRVGGRRFFIDLAMPMLMSWVLGGNGEKLE-GRIQHRLSEK----ANDQL
NpZEP 442 IMASTYKAYLGVGLG-PLSFLLTKFRVPHPRVGGRRFFIDLAMPMLMSWVLGGNGEKLE-GRIQHRLSEK----ANDQL
CaZEP 440 IMASTYKAYLGVGLG-PLSFLLTKFRVPHPRVGGRRFFIDLAMPMLMSWVLGGNGEKLE-GRIQHRLSEK----ANDQL
LeZEP 448 IMASTYKAYLGVGLG-PLSFLLTKFRVPHPRVGGRRFFIDLAMPMLMSWVLGGNGEKLE-GRIKHRLSEK----ANDQL
OsZEP 440 IMASTYKAYLGVGLG-PLSFLLTKFRVPHPRVGGRRFFIKYEMPLMSWVLGGNSKLE-GRPLSRLSDK----ANDQL
CrZEP 459 IMASTYKAYLGEQWS---KVVVEGLRIPHPGRVVGRLVMLLTPMSVLEWVLGGNDHVAPHRTSYSLGDKPKAFPSRFP
CspZEP 466 IMASTYKAYLGEGLPGPLQQLTTLKLIHPHPGRVVGRLVMLLTPMQLGWVLGGNLENLTKSRVGHRLADQPKAFHESQFS

```

```

AtZEP_col 517 EWFEDDDALERTIKGEWYLIFH---GDDCCV-----SETLCLTKDEDQ-PCIVGSEPDQDFP-----GMRIVI
AtZEP_? 517 EWFEDDDALERTIKGEWYLIFH---GDDCCV-----SETLCLTKDEDQ-PCIVGSEPDQDFP-----GMRIVI
AtZEP_1er 517 EWFEDDDALERTIKGEWYLIFH---GDDCCV-----SETLCLTKDEDQ-PCIVGSEPDQDFP-----GMRIVI
CuZEP 514 TWFRDDDALERAMNGEWFLLPS---GSENVV-----SQPIYLSGSHNEPYLEIGSESHEDFP-----RTSIVI
PaZEP 517 NWFEDDDALERATDAEWLLEFA---GQDNDA-----SOLLCLNRDEKN-PCIVGSEPDQDFP-----GISTAI
NtZEP 516 NWFEDDDALERATDAEWLLEFA---GNSNAA-----LETIVLSRDE-NMPONIGSVSHANIP-----GKSVVI
NpZEP 516 NWFEDDDALERATDAEWLLEFA---GNSNAA-----LETIVLSRDE-NMPONIGSVSHANIP-----GKSVVI
CaZEP 514 NWFEDDDALERATDAEWLLEFA---GNSNAA-----LETIVLSRDE-NMPONIGSVSHANIP-----GKSVVI
LeZEP 522 KWFEDDDALERATDAEWLLEFA---GNSSG-----LEATVLSRDE-EVPTVGSISHTNIP-----GKSVVI
OsZEP 514 RWFEDDDALEQAMGGEWYLIFH---SSGD-----SQPIYLSRDEKK-SLSIGSRSDPSNS-----TASTAL
CrZEP 536 EFMNDASLIRSSHADWLLVAERDAATAAANVNAATGSSAAAAAAAVNSSQCKGYMADSAALVGRCGATSRPATAV
CspZEP 546 YLMENDEAIIQSSHADWMLTSREAGSGSSD-----SNARVDATAATSTSECKGYIIDEPSIIGRK--SESADLSI

```

```

AtZEP_col 576 PSSQVSKMHARVITY-----KDGA-----FFLMDLRSEHGTWVTDNEGRRYRAIPNF
AtZEP_? 576 PSSQVSKMHARVITY-----KDGA-----FFLMDLRSEHGTWVTDNEGRRYRAIPNF
AtZEP_1er 576 PSSQVSKMHARVITY-----KDGA-----FFLMDLRSEHGTWVTDNEGRRYRAIPNF
CuZEP 574 PSAQVSKMHARISY-----KDGA-----FYLIDLQSEHGTWVTDNEGRRYRVSPNF
PaZEP 576 BKPQVSEM HARISY-----KDGA-----FYLTDLRSEHGTWVTDNEGRRYRVSPNF
NtZEP 575 PLPQVSEM HARISY-----KCGA-----FFVTDLRSEHGTWVTDNEGRRYRASPNF
NpZEP 575 PLPQVSEM HARISY-----KCGA-----FFVTDLRSEHGTWVTDNEGRRYRASPNF
CaZEP 573 PLSQVSEM HARISY-----NGGA-----FLGTAFRSQHGTEIDNEGRRYRVSPNF
LeZEP 581 PLPQVSEM HARISC-----KDGA-----FFVTDLRSEHGTWVTDNEGRRYRTSPNF
OsZEP 571 BLPQVSEM HARITIC-----KNKA-----FVYTDNGSEHGTWVTDNEGRRYRVSEL
CrZEP 616 DDVHVAESHQAQWRGLAGLPSSSSASTAAASASSAASAGTASTLGSSEGWLRDLGSGRGTWVN---GR---RLPDGA
CspZEP 617 NDGQVAPQ HARVWR-----TETSSVSRDVVAY-----EMHVQDLGSDACTWLN---GR---PMPRGG

```

```

AtZEP_col 622 PARFRSSDIIEFGSD-KKAAFRVKVIKTPKSTRKNESNDKLIQTA-----
AtZEP_? 622 PARFRSSDIIEFGSD-KKAAFRVKVIKTPKSTRKNESNDKLIQTA-----
AtZEP_1er 622 PARFRSSDIIEFGSD-KKAAFRVKVIKTPKSTRKNESNDKLIQTA-----
CuZEP 620 PARFRPSDIIEFGSD-KKAAFRVKVIKTPKSTRKNESNDKLIQTA-----
PaZEP 622 PARFRPSDAIEIEGSD--QKVAFRVKVMKSSPG---SVEKEG---IIQAA-----
NtZEP 621 PTRFHPSDIIEFGSD-KKAAFRVKVMKFPKIAAK-EDRQ---AVGAA-----
NpZEP 621 PTRFHPSDIIEFGSD-KKAAFRVKVMKFPKIAAK-EDRQ---AVGAA-----
CaZEP 619 PMRFHSSDVIIEFGSD-KAAFRVKAMKFPKIAAK-EDRQ---AVGAA-----
LeZEP 627 PTRFHPSDVIIEFGSD-KAAFRVKAMKFPKIAAK-EDRQ---AVGAA-----
OsZEP 617 PCPE-PS---LGCHE-----
CrZEP 691 TVQLWPGDAVEFGRHPSHEVFRVKMQRVTLRSDELSGQAYTTLVVGKIRNN-DYVMPESRPDGGSQQPGRLVTA
CspZEP 669 TCQLHAGDVLIEFGSQSPSKEVYFRVKMQRVSLRNDKLNHGAFTTLVVGHEHGHDKHMIMA-----

```

Supplemental Figure 4. Alignment of the deduced amino acid sequences of ZEP proteins. Identical residues are in black and similar residues are in grey. The SCRs that provide a signature for the lipocalins and other conserved motifs are indicated above. Conserved N-glycosylation sites are in pink. Conserved cysteine residues are in green. The triangle indicates the chloroplastic transit peptide cleavage site.

## ADP-binding site

```
gi|23043609| 1 -----MEEETIIVGAGIGGLTLACALEQKGIQFQIYEQ-ADSEBALG--YG-IQVSPNVVRLRELGLEQQLE
gi|27380702| 1 -----MALSRITIVIAGAGIGGLTAALALAARGFRIVVLEK-AERLEEVG--AG-LQLSPNASRVLVGLGLTERLK
gi|23124423| 1 MNINPTEKLSQPIVEKVAIVGAGPGLAAALALRSQGIQVQIYEQ-AQEFERPAG--TG-IGLAPNGLNFLDAIAPGIVET
OsZEP      1 QAASGGGGEGTRRPRVLVAGGGIGGLVIALAARRKGYEIVTVFERDMSAVRCEQYRGPLOIQSNALAAALADMSVAEE

gi|23043609| 65 EVSHLGLGFEIIRSEFNSNRVLATWOLDN-----DTPY-MQCRADLHSLVFNSTQKSRTHFSRCLSESYEKDDQLL
gi|27380702| 67 LRAVVVEAVSIVMSARAGGELLRMPLEGEASV---RAGAPY-WVVHRADLQALAGAVSEHPDIDL-KLGATFED-----
gi|23124423| 77 LKCSGCEVHHTVTKNFRGETTRANASKYQEK---Y-GQEL-VTVVWYRLOQVLAASRIPSDIVHLNHRCLGFEOD-----
OsZEP      81 VMREGGVTGRINLLVPLSSGWIKFDTFTPAERGLEIVTRVLSRMTLQQLLRAVGGDAILNDSHVVDIIDD-----

gi|23043609| 135 LSWHNLPTTAKLIVAADGVRS-LVRRS-LENAAHGENPQDSATS-VFSQNCAGYAGYAARAILP-FQDKYLPWGRKA
gi|27380702| 136 VAPH-----AKGLTVVH---RSGTIRRSDLASALIGADGIWSTVRQHLFPEVQPRESCGLIARGLDLDATQHPKRYTAREV
gi|23124423| 146 -----ENGVEIR--FD--GEKSVYADLLIGADGVNSVIRELLFGEGKPNYIGSMCWRAYIK---YHHEIFNDYE
OsZEP      155 -----GNKVTAILLE----DGRKFECDLLVIGADGIWSKVRKVLFGQSEATYSEETCTGTGIAD--FVFPDIDTVGY

gi|23043609| 211 TWMGKNHVVVYPNGNEQNSTSWNLVVLVVDKNWNPQGWITPAKKAARDANQSEELNFIIFDMAASPEPCFKWGL
gi|27380702| 208 QLWMGNAAHVVAYFLAGGR-----LNVVAVLPG-TWNRPGWSTPGDPRVMDAFA--APRWPSOARMMLAAVDWRKVAL
gi|23124423| 208 LVFVKGNOQFMYLLNVGC-----GYMSWISR--KFSEIYSIChSADEVKSRILHELADWDESFQVWVQATPAEQINEG
OsZEP      218 RWFELGKQYFVSSDVGAC-----KMQWYAF-HKEPAGGIDPENGK--NKRLLLEIFNGWCDNVVDLINATDEBAILRR
```

## FAD-binding site

```
gi|23043609| 291 F-IHKPLPY--WSRGKVTLLGDAAHPLPFOAQAAMAIEDAYVLAKYLA SE---RD-----TEKAFIKYQQARIKRT
gi|27380702| 281 FGVPLGCP---WSKGFVALLGDAVHAMLPEAAQAGMATEDAAVLAQHLSPETAESTDG-----IWAALQYGRARQARV
gi|23124423| 279 P-ICDRPPLTHWSQGRVTLGDAAHPLMAPAMQOGANTTFEDAYELRECFQS---AN-----IQBALTSYEQRRMORT
OsZEP      287 D-IYDRPPTFNWKGKRVTLGDSVHAMQPNLGGCCMAIEDAYQLAVELEKSWQESAKSGTPMDIVSSLRRYEKBRILRV

gi|23043609| 358 MKVQVMSINNANTLHASCVKAAIRNPAIGVVSST-----VPSLNNKKTAWIYDLDVKTAVS--
gi|27380702| 353 RRVORTARQQGRIVYHFSGLAIARDVAIRALG-----PERMLARQDWIYGWRF-----
gi|23124423| 348 EITQARSALGEMRYEENTVASNGREQ-TMS-----VNDDFHKWLYDYKPSATIKF-
OsZEP      366 SVLHGLARMALMATTYRFYLVGLGFLSFLIKLRIPHGRVGGRFKIKYGMPLMLSWVLGGNSTKLEGRF
```

Supplemental Figure 5. Alignment of *OsZEP* with mono-oxygenases and related FAD-dependent oxydases from bacteria and cyanobacteria. Identical residues are in black and similar residues are in grey. Two conserved motifs are indicated above. The *OsZEP* SCR1 is indicated by pink letters.

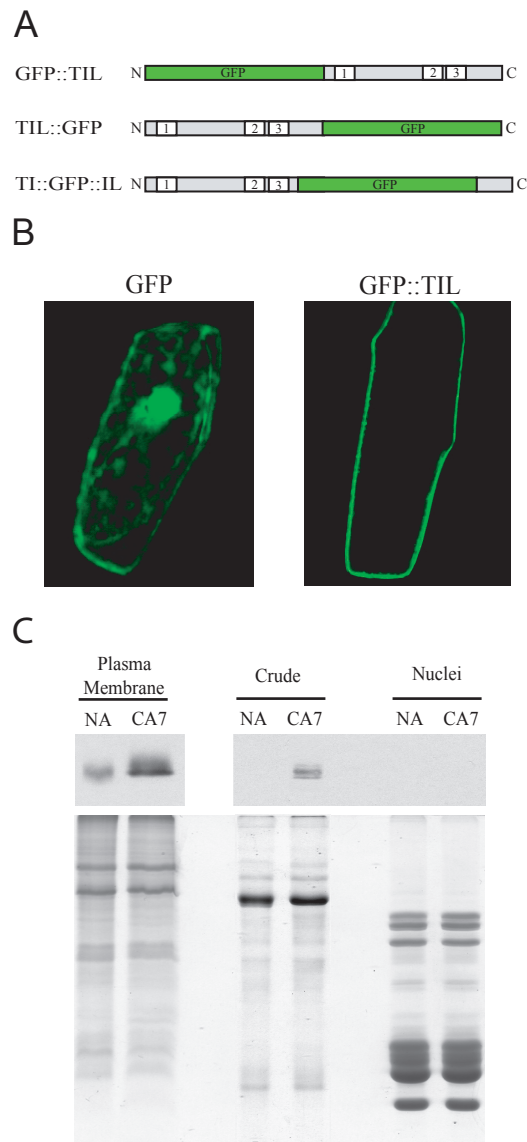

Supplemental Figure 6. Cellular localization of the plant TIL lipocalins.

A. Schematic representation of GFP fusions used in the transient expression experiments.

B. Transient expression assays of GFP-TIL fusions. Plasmids carrying the fusions were transformed into onion epidermal cells by microprojectile bombardment. Confocal images of GFP fluorescence were captured 20 hours after transformation. Only the GFP::*At*TIL data is shown since the three constructs gave the same fluorescence pattern.

C. Biochemical fractionation analysis. Wheat protein extracts were prepared and subjected to SDS-PAGE and western blot analyses. Upper panels, western blot results obtained using the anti-*Ta*TIL antibody (dil. 1/25,000, 10 sec. exposure for the plasma membrane fractions; dil. 1/2,500, 5 min. exposure for the other fractions). Lower panel, Coomassie Brilliant Blue-stained gel showing the quality of the preparations. Typical protein patterns are observed for each fraction.



Mmus.a1GP -----QNPEHVNITIGDPITNETLSWLSDKWFFFIGAAVLNPDYRQ-----EIQKTQM  
Rnor.a1GP -----IQNPEPANTLGIPITNETLKWLSDKWFYMGAAFRDPVFKQ-----AVQTIQT  
Hsap.a1GP -----QIPLCANLVVPVITNATLDQITGKWFYIASAFRNEEYNK-----SVQEIQA  
Ocun.a1GP -----QDPACANFSTSPITNATLDQLSHKWFFTASAFRNPKYKQ-----LVQHTQA  
Hsap.RBP -----ERDCRVSSFRVKENFDKARFSGTWYAMAKKDPE-----GLFL---QDN  
Ggal.RBP -----ERDCRVSSFVKENFDKNRYSGTWYAMAKKDPE-----GLFL---QDN  
Xlae.RBP -----EKNCRVDNFEVMKDFNKERYAGVWYAVAKKDPE-----GLFL---LDN  
Omyc.RBP1 -----SDCQVSNIQVMQNFDRSRYTGRWYAVAKKDPV-----GLFL---LDN  
Ggal.Purp -----QTCAVDSFSVKDNFDPKRYAGKWAYALAKKDPE-----GLFL---QDN  
TaTIL-1 -----MAAKKSGSEMGGVVLGLDVARYMGRWYEIASFPNF-----FQPRD---GRD  
AtTIL -----MTEKK---EMEVVKGLNVERYMGRWYEIASFPNR-----FQPKN---GVD  
TaTIL-2 -----MAAMK-----VVRNLDLERYMGRWYEIACFPSR-----FQPKD---GAN  
AtZEP -----CITGDRINGLVDGISGTSWYVKFDTFTPAASRG-LPVTRVISRM  
OsZEP -----CVTGDRINGLVDGISGSWYIKFDTFTPAAERG-LPVTRVISRM  
TaVDE -----PDPSALVKNFNMADFRGKWISSGLNPT-----FDTFD-----C  
AtVDE -----PDPSVLVQNFNISDFNGKWIITSGLNPT-----FDAFD-----C  
TaCHL -----MMTKGMTAKNFDPVRYSGRWFEVASRKGK-----FAGQGQEDCHC  
AtCHL -----MMMMRGMTAKNFDPVRYSGRWFEVASLKR-----FAGQGQEDCHC  
Mmus.ApoD -----QNFHLGKCPSPVQENFDVKKYLGRWYEIEKIPAS-----FEKG----N-C  
Hsap.ApoD -----QAFHLGKCPNPPVQENFDVNKYLGRWYEIEKIPTT-----FENG----R-C  
Sscr.VEG -----AQEFPVAVGQPLQDLLGRWYLKAMTSDP-EIP-----GKKPESV  
Cfam.f1p -----QDTPALGKDTVAVSGKWLKAMTADQ-EVP-----EKPDSV  
Rnor.VEG2 -----AQAFPTEENQDVSGTWYLKAAAWDK-EIFT-PDKKFGSVSV  
Hsap.VEG -----AHLLLASDEEIQDVSGTWYLKAMTVDR-EFPE-----MNLESV  
Mmus.VNSP1 -----QDSSFLAFNNGNFSGKWFLKALVSED-DIPI-----NKV  
Mmus.VNSP2 -----LQTYDDLFPFISEEDKLSGVWFIKATVSQRRE-----VEGETL  
Mmus.MUP4 -----HAE EATSKGQNLNVEKINGEWF SILLASDKREKIE-----EHGSMRV  
Mmus.MUP5 -----EEASSERQNFNVEKINGKWF SILLASDKREKIE-----EHGTMRV  
Mmus.MUP -----HAE EASSTRGNFNVEKINGEWH T I I LAFDKREKIE-----DNGFRL  
Mmus.mMUP -----HAE EASSMERNFNVEQ I S G Y W F S I A E A S Y E R K I E -----EHGSMRA  
Rnor.a2g1 -----HAE EASSTRGNLDV D K L N G D W F S I V V A S D K R E K I E -----ENASMRV  
Rnor.a2g3 -----HAE EASFERGNLDV D K L N G D W F S I V V A S D K R E K I E -----ENGSMRV  
Hsap.Lcn9 -----QEFDPH TVMQRNYNVARVSGVWYSIFMASDDL N -----RIKENGDLRV  
Cfam.f2p -----QEGNH EEPQGGLEELSGRWHSVALASNK--SDL--IKPWGHFRV  
Tvul.Lip -----LQPECSRSEEDLSDEKERKWEQLSRHWHTVVLASSD--RSL--IEEEGPFRN  
Ccri.Aphr -----QDFAELQ GKWY T I V I A A D N L E K I E -----EGGPLRF  
Rnor.OBP1 -----HHENLDI SPSEVNGDWRTLYIVADNVEKVA-----EGGSLRA  
Mmus.Pbas -----VMSLKKKIDGPWQTIYLAASTMEKIN-----EGSPLRT  
Rnor.Pbas -----MMTDKNLKKKIEGNWRTVYLAASSVEKIN-----EGSPLRT  
Btau.alle -----AQETPAEIDPSKIPGEWRIIYAAADNKDKIV-----EGGPLRN  
Btau.BLB -----LIVTQTMKGLDIQKVAGTWYSLAMAASD--ISL-LDAQSAPLRV  
Sscr.BLB -----VEVTPIMTELDTQKVAGTWHTVAMAVSD--VSL-LDAKSSPLKA  
Hsap.PP14 -----VPAMDIPQTKQDLELPKLAGTWHSMAMATNN--ISL-MATLKAPLRV  
Mmus.Almg -----DPASTLP-DIQVQENFSESR IYGK WYNLA VGSTCPWLSR-----IKDKMSV  
Hsap.Almg -----PVPTPPDN IQVQENFNISRIYGK WYNLAIGSTCPWLK-----IMDRMTV  
Xlae.Almg -----SPIOPEDN IQI QENFDLQRIYGK WYDIAIGSTCKWLK-----HKEKFNM  
Ssal.Almg -----VPVLPEPLFPIQDNFDLTKFMGKWHDI AIGSTCPWMQR-----HKGDAAI  
Ppla.Almg -----LPVLPEPLYPTQENFDLTRFVGTWHDVALTSSCPHMQR-----NRADAAI  
Hsap.C8GC -----QKPQRPRRPASPISTIQPKANFDAQQFAGTWLLVAVGSACRFLQ-----EQGHRAEA  
Ocun.C8GC -----RWAQKPRGAPSAISAIQPKANFDAQQFAGTWLLAAVGSACHFLQ-----EQGHRAEA  
Xlae.cpl1 -----SLWVGAEVQVQPDFQKEKVLGK WY G I G L A S N S N W -----FKDRKSHMKM  
Bmar.lip -----DVPIQPDFQEDKILGK WY G I G L A S N S N W -----FQSKKQQLKM  
Mmus.PGDS -----QTPAQGHDTVQPNFQQDKFLGRWYSAGLASNSSW-----FREKKAVLYM  
Hsap.PGDS -----QAAPEAQVSVQPNFQQDKFLGRWFSAGLASNSSW-----LREKKAALSM  
Mmus.NGAL -----QDSTQNLIPAPSLLTVP LQPDFRSDQFRGRWYVVG LAGNAV-----QKKTEGSFTM  
Hsap.NGAL -----QDSTSDLIPAPPLSKVPLQNFQDNQFQGK WY V V G L A G N A I -----LREDKDPQKM  
Hsap.Lcn12 -----KVLQAQTPTPLPLPPMQSFQGNQFQGEWFLGLAGNSF-----RPEHRALLNA

Mmus.Lcn12 -----QILESQISAMSQGFPMQTSFQSDQFQGEWFLGLADNTFR-----REHRALLNF  
DhLip -----KKE--EMPVVEKIELDKYLGKWEIARKPFL-----FQKCC---YSN  
Cfre.OML -----CSSPTPPKGVTVVNNFDAQRYLGTWYEIARFDHR-----FERG----LDK  
Ecol.OML -----CSSPTPPRGVTVVNNFDAQRYLGTWYEIARFDHR-----FERG----LEK  
Vcho.Lpro ----MEILIGATCLGMPEVSKPVSDFELNNYLGKWEIVARLDHS-----FERG----LSQ  
Ddis.Lip ILGGVTTYAYNSFKRYIPEGVHAVKPFYPEKYVGKWEIARLYTY-----FEKD----LDK  
Dmel.Lip --AVWVAHAQVPFPGKCPDVKLLDTFDAEAYMGVWYEAAYPFA-----FEIG----KCC  
Gmel.Gall -----VHEGKCPDFKPVDFNLTAYQGVWYEISKTPND-----AEKNG---K-C  
Pbra.Bbp -----NVYHDGACPEVKPVDFNFDWSNYHGKWEVAKYPNS-----VEKY----GKC  
Msex.IcyA -----GDIFYPGYCPEVKPVDDFDLSAFAGAWHEIAKLPLE-----NENE----GKC  
Hgam.CRC2 -----DGIPSFVTAGKCASVANQDNFDLRRYAGRWYQTHI IENA-----YQPV----TRC  
Hgam.CRC1 DKIPDFVVPKGCASVDRNKLWAEQTPNRNSYAGVWYQFALTNNP-----YQLI----EKC  
Mmus.Lcn13 -----AQEAPPDDLVDYSGIWIYAKAMVHNG-----TLPSHKIPS  
Tvul.BL -----IQAIENIHSKEELVVEKLI GPWYRVEEAKAM-----EFSIPL  
Mmus.Lcn11 -----LQDFHPEQVTGPWHTLKLASTDRSLIE----EGGAYRC  
GvBLC -----DSQPIETVAEVDNRYDGRWYELARTPNIF-----QIGCTC  
Btau.OBP -----KNAQEEEEAEQNLSELSPWRVTVYIGSTNPEKIQ----ENGPFRT  
MgLip DTSSVPNTVPSLWDGECFYPTPDIGFDTKSYLGRWYQVAGTVAP-----FTASCKC  
Same.Laz -----AQETMGCADRSAINDFNATLYMGKWEYAKMGSMPEEYEG-----GVC  
Tvul.LLP -----DDVAFSAFTPSE--GTYVQVIAVDKEFPPEE-----EIPRDM  
Ecab.p19p -----RRPHALHMGPGDPNFDEKLVKWKWFSVALASNE-----PKF-IAKD  
Ggal.QS-21 -----AATVPDSSEVAGKWIIVALASNT---DS-FLREKGMKMM  
Hsap.Lcn5 -----QAVWLGRLDPEQLLGPWYVLAVASREK----GFAMEKDMKNV  
Mmus.Lcn8 -----ESTRVELVPEKIAGFWKEVAVASDQ-----KLVLKAQRR  
Mmus.ERBP -----TEAAVVKDFDVKFLGFWYIEIALASKMG-----AYGLAHKEE  
Lviv.ESP -----DIPVVPNFDAQKTVGKWHPIGMAKLP-----EVPEYEQKI  
PyLip -----RKC PN PATVPALDVAAYTGRWYQIGVTAFAE-----RQEDNKPC

:

Mmus.a1GP VFFNLTPN---LINDTMELREYHTI-----DDHCVYNSTHLGIQRE-----  
Rnor.a1GP EYFYLTTPN---LINDTIELREFQTT-----DDQCVYNFTHLGVQRE-----  
Hsap.a1GP TFFYFTPN---KTEDTIFLREYQTR-----QDQCIYNTTYLNVQRE-----  
Ocun.a1GP AFFYFTAI---KEEDTLLLREYITT-----NNTCFYNSSIVRVQRE-----  
Hsap.RBP IVAEFSV----DETGQMSATAKGRVR---LLNNWDVDCADMVGTFTDTE-----  
Ggal.RBP VVAQFTV----DENGQMSATAKGRVR---LFNNWDVDCADMIGSFTDTE-----  
Xlae.RBP IAANFKI----EDNGKTTATAKGRVR---ILDKLELCANMVGTFIETN-----  
Omyc.RBP1 VVAQFSV----DESGKVTATAHGRVI---ILNNWEMCANMFGTFEDTP-----  
Ggal.Purp ISAEYTV----EEDGTMTASSKGRVK---LFGFWVICADMAAQYTPDPT-----  
TaTIL-1 TRATYELM---EDGATVHVLNETWS-----KGKRD FIEGTAYKADPASEE-----  
AtTIL TRATYTLN---PD-GTIHVLNETWS-----NGKRGFIEGSAYKADPKSDE-----  
TaTIL-2 TRATYTLG---PD-GAVKVLNETWT-----DGRRGHIEGTAFRADPAGDE-----  
AtZEP TLQQILAR---AVGEDVIRNESNVVD--FEDSGDKVTVVLENGQRYEGDLLVGADGI--  
OsZEP TLQQILAR---AVGDDAILNDSHVVD--FIDDGNKVTAILEDGRKFEGDLLVGADGI--  
TaVDE QLHEFR----LE-GDRLVANLAWRIP--TPDTGFFTRGAVQRFVQDSSQPAILYN----  
AtVDE QLHEFH----TEGDNKLGVNISWRIK--TLDSGFFTRS AVQKFVQDPNQPGVLYN----  
TaCHL TQGVYT----FDEKAGAIKVETFCVHGPSDGYITGIRGKVQCLSQEDMAGAETDLEREE  
AtCHL TQGVYT----FDMKESAIRVDTFCVHGPSDGYITGIRGKVQCVGAEDLEKSETDLEKQE  
Mmus.ApoD IQANYSL----MENGNI EVLNKE L-S---PDGTMNQVKGEAKQSNVSEP-----  
Hsap.ApoD IQANYSL----MENGKIKVLNQEL-R---ADGTVNQIEGEATPVNLTEP-----  
Sscr.VEG TPLILKA---LEGGDLEAQITFLI-----DGQCQDVTVLVKKTN-----  
Cfam.f1p TPMILKA---QKGGNLEAKITMLT-----NGQCQNITVVLHKTSE-----  
Rnor.VEG2 TPMKIKT---LEGGNLQVKFTVLI-----SGRCQEMSTVLEKTD-----  
Hsap.VEG TPMTLTT---LEGGNLEAKVTMLI-----SGRCQEVKAVLEKTD-----  
Mmus.VNSP1 SPMLILV----LNNGDIELSITHMI-----YDQCLEVTTILEKTD-----  
Mmus.VNSP2 VAFPIKFTC--PEEGTLELRHTLAS-----KGECINVGIRLQRTEE-----  
Mmus.MUP4 FVEHIHV----LEN-SLAFKFHTVI-----DGECSEIFLVADKTEK-----  
Mmus.MUP5 FVEHIDV----LEN-SLAFKFHTVI-----DEECTE IYLVADKTEK-----

|            |               |                       |                             |
|------------|---------------|-----------------------|-----------------------------|
| Mmus.MUP   | FLEQIHV----   | LEN-SLVLKFHTVR-----   | DEECSELSMVADKTEK-----       |
| Mmus.mMUP  | FVENITV----   | LEN-SLVFKFHLIV-----   | NEECTEMTAIGEOTEK-----       |
| Rnor.a2g1  | FMQHIDV----   | LEN-SLGFKFRIKE-----   | NGECELYLVAYKTPE-----        |
| Rnor.a2g3  | FVQHIDV----   | LEN-SLGFTFRIKE-----   | NGVCTEFSLVADKTAK-----       |
| Hsap.Lcn9  | FVRNIEH----   | LKNGSLIFDFEYMV-----   | QGECVAVVVVCEKTEK-----       |
| Cfam.f2p   | FIHMSA----    | KDGNLHGDILIPQ-----    | DGQCEKVSMTAFKTAT-----       |
| Tvul.Lip   | FIQNITV----   | ESGNLNGFFLTRK-----    | NGQCIPLYLTAFKTEE-----       |
| Ccri.Aphr  | YFRHIDCY---   | KNCSEMEITFYVIT-----   | NNQCSKTTVIGYLKG-----        |
| Rnor.OBP1  | YFQHMECG---   | DECQELKIIFNVKL-----   | DSECQTHTVVGQKHE-----        |
| Mmus.Pbas  | YFRHICVG---   | RRSNQVYLYFFIKK-----   | GTKCQLYKVIGRKK-----         |
| Rnor.Pbas  | YFRRIECG---   | KRCNRINLYFYIKK-----   | GAKCQQFKIVGRRS-----         |
| Btau.alle  | YFRRIECI---   | NDCESLSITFYLKD-----   | QGTCLLLTEVAKRQ-----         |
| Btau.BLB   | YVEELKPT---   | PEG-DLEILLQKWE-----   | NGECAQKKIIAEKT-----         |
| Sscr.BLB   | YVEGLKPT---   | PEG-DLEILLQKRE-----   | NDKCAQEVLLAKKT-----         |
| Hsap.PP14  | HITSLIPT---   | PED-NLEIVLHRWE-----   | NNSCVEKKVLGEKT-----         |
| Mmus.Almg  | QTLVLQEG---   | ATETEISMTSTRWR-----   | RGVCEEITGAYQKTD-----        |
| Hsap.Almg  | STLVLGEG---   | ATEAEISMTSTRWR-----   | KGVCEETSGAYEKTDT-----       |
| Xlae.Almg  | GTLELSDG---   | ETDGEVRIVNTRMR-----   | HGTCSQIVGSYQKTET-----       |
| Ssal.Almg  | GTLELQAS---   | GTEDKVSMTSRMCK-----   | HGKCEQISGDYELTAT-----       |
| Ppla.Almg  | GKLVLEK---    | DTGNKLVTRTRLR-----    | HGTCVEMSGEYELTS-----        |
| Hsap.C8GC  | TTLHVA-----   | PQGTAMAVSTFRKL-----   | DGICWQVRQLYGDG-----         |
| Ocun.C8GC  | TALHVA-----   | PQGAAMAVSTFRKL-----   | DGICWQVSQRYGATG-----        |
| Xlae.cpl1  | CTTIITP----   | TADGNLEVTATYPK-----   | MDRCETKSMTYFKT-----         |
| Bmar.lip   | CTTVITP----   | TADGNLDVVATFPK-----   | LDRCEKKSMTYIKT-----         |
| Mmus.PGDS  | CKTVVAP----   | STEGGLNLTSTFLR-----   | KNQCETKIMVLQPA-----         |
| Hsap.PGDS  | CKSVVAP----   | ATDGGLNLTSTFLR-----   | KNQCETRTMLLQPA-----         |
| Mmus.NGAL  | YSTIYEL----   | QENNSYNVTSILVRD-----  | QDQGCYRWIRTFVPS-----        |
| Hsap.NGAL  | YATIYEL----   | KEDKSYNVTSVLFR-----   | KKKCDYWIRTFVPG-----         |
| Hsap.Lcn12 | FTATFEL----   | SDDGRFEVWNAMTR-----   | GQHCDTWSYVLI PAAQ-----      |
| Mmus.Lcn12 | FTTLFEL----   | KEKSQFQVNTSMTR-----   | GKHCNTWSYTLIPATK-----       |
| DhLip      | VSAKYSLN---   | DN-ANINVDNSCYSK-----  | DGKLRQAIGEAFQNPFPN-----     |
| Cfre.OML   | VTATYSLR----  | DDGGINVINKGYNP-----   | DREMWOQKTEGKAYFTGDPS-----   |
| Ecol.OML   | VTATYSLR----  | DDGGLNVINKGYNP-----   | DRGMWQOQSEGKAYFTGAPT-----   |
| Vcho.Lpro  | VTAEYRVR---   | NDGGISVLNRGYSE-----   | EKGWKEAEGKAYFVNGST-----     |
| Ddis.Lip   | ITAEYSIN---   | KDGSITVVNSGYNY-----   | KKKKRENAKGIAYFVNGSD-----    |
| Dmel.Lip   | IYANYSL----   | IDNSTVSVVNAAINR-----  | FTGQPSNVTGQAKVLGPGQ-----    |
| Gmel.Gall  | GQAEYKL-----  | EGEVVKVKNSHV-----     | VDGVQKYVEGTAKFAEDANKSA----- |
| Pbra.Bbp   | GWAETYP-----  | EGKSVKVSNYHV-----     | IHGKEYFIEGTAYPVGDSKIGK----- |
| Msex.IcyA  | TVAEYKY-----  | DGKKASVYNSFV-----     | INGVKEYMEGDLEIAPDAKLTK----- |
| Hgam.CRC2  | IHSNYEYS---   | TNDYGFKVTTAGFNP-----  | NDEYLKIDFKVYPTKEFP-----     |
| Hgam.CRC1  | VRN--EYS---   | FDGKQFVIKSTGIAY-----  | DGNLLKRNGKLYPNPFGEP-----    |
| Mmus.Lcn13 | IVFPVRIIA--   | LEEGDLETTVVFWN-----   | NGHCREFKFVMKKTEE-----       |
| Tvul.BL    | FDMNIKEVN--   | RTPEGNLELIV-LEQ-----  | TDSCVEKKFLLKKT-----         |
| Mmus.Lcn11 | FMTDIVL----   | LDNGLNVTYFHRK-----    | DGKCVKEFYIAEKTDT-----       |
| GvBLC      | VTANYSV----   | LSESSISVFNTCNRFR----- | PRGNLVTIDGVAVVADPN-----     |
| Btau.OBP   | YFRELVFD---   | DEKGTVDFYFSVVKR-----  | DGKWKNVHVKATKQ-----         |
| MgLip      | IYAQYAL----   | NDNGTIQVNNTCCEAG----- | GRAVNILGTAEPADPGYG-----     |
| Same.Laz   | VTAEYS-----   | MSSNNITVVNSMKDN-----  | TTHEVNTTTGWAEFASELHT-----   |
| Tvul.LLP   | SPLTIMY----   | LDDGKMEARFTMKK-----   | DDNCEEINIMLEKTAD-----       |
| Ecab.p19p  | TDMKFFIHKIQVT | PESLQFHFHRKV-----     | RGMCVPTMMAHKTCK-----        |
| Ggal.QS-21 | VMARISF----   | LGEDELEVSYAAPS-----   | PKGCRKWETTFKKT-----         |
| Hsap.Lcn5  | VGVVVTL----   | TPENNLRTLSSQHG-----   | LGGCDQSVMDLIKRS-----        |
| Mmus.Lcn8  | VEGLFLT----   | FSGGNVTVKAVYNS-----   | SGSCVTESSLGSDRT-----        |
| Mmus.ERBP  | KMGAMVVE---   | LKENLLALTTTYYN-----   | EGHCVLEKVAATQVDG-----       |
| Lviv.ESP   | SPMDHME---    | LTDGDMKLTANYMD-----   | GVCKEATAMLKHTDK-----        |
| PyLip      | VTADYRLTG--   | PTVEVINCKQDVPANR--    | SSGAIVGCAQAVAFPGKKED-----   |

|            |                                                               |                                 |
|------------|---------------------------------------------------------------|---------------------------------|
| Mmus.a1GP  | --NGTLSKYVGGVK-----                                           | IFADLIVLKMHGA-----              |
| Rnor.a1GP  | --NGTLSKCAGAVK-----                                           | IFAHLIVLKKHGT-----              |
| Hsap.a1GP  | --NGTISRIVGGQE-----                                           | HFAHLLILRDTKT-----              |
| Ocun.a1GP  | --NGTLSKHDGIRN-----                                           | SVADLLLLLRDPGS-----             |
| Hsap.RBP   | -DPAKFKMKYWGVASFLQ-----                                       | KGNDDDHWIVDTDYDT-----           |
| Ggal.RBP   | -DPAKFKMKYWGVASFLQ-----                                       | KGNDDDHWVVDTDYDT-----           |
| Xlae.RBP   | -DPAKYRMKYHGALAILL-----                                       | RGLDDHWVVDTDYTT-----            |
| Omyc.RBP1  | -DPAKFKMRYWGAASYLQ-----                                       | TGNDDDHWVIDTDYDN-----           |
| Ggal.Purp  | -TPAKMYMTYQGLASYLS-----                                       | SGGDNYWVIDTDYDN-----            |
| TaTIL-1    | ---AKLKVKFY--VPPFLPII-----                                    | PVVGDYWVLYVDDDD-----            |
| AtTIL      | ---AKLKVKFY--VPPFLPII-----                                    | PVTGDYWVLYIDPD-----             |
| TaTIL-2    | ---AKLKVRFY--VPPFLPVF-----                                    | PVTGDYWVLVHDDA-----             |
| AtZEP      | -WSKVRNNLFRGRSE-ATYSGYTCYTGIADFIPADIESVG--YRVFLGHKQYFVSSDVGGG |                                 |
| OsZEP      | -WSKVRKVLFGQSE-ATYSEYTCYTGIADFVPPDIDTVG--YRVFLGHKQYFVSSDVGAG  |                                 |
| TaVDE      | -HDNEYLHYQDDWY-----                                           | ILSSKIE-NKDDDYIFVYYRGRNDAWD-GYG |
| AtVDE      | -HDNEYLHYQDDWY-----                                           | ILSSKIE-NKPEDIYFVYYRGRNDAWD-GYG |
| TaCHL      | MISSKCFLRFPT-----LPF-----                                     | IPKLPYDVLATDYDN-----            |
| AtCHL      | MIKEKCFRLFPT-----IPF-----                                     | IPKLPYDVIATDYDN-----            |
| Mmus.ApoD  | ---AKLEVQFFP---LMP-----                                       | PAPYWILATDYEN-----              |
| Hsap.ApoD  | ---AKLEVKFSW---FMP-----                                       | SAPYWILATDYEN-----              |
| Sscr.VEG   | -QPFTFTAYDYGK-----                                            | RVVYILPSKVKDH-----              |
| Cfam.f1p   | --PGKYTAYEGQR-----                                            | VVFIQPSVVRDH-----               |
| Rnor.VEG2  | --PGKYTAYSGKQ-----                                            | VFTVYSIPSAVEDH-----             |
| Hsap.VEG   | -EPGKYTADGGK-----                                             | HVAYIIRSHVKDH-----              |
| Mmus.VNSP1 | -VPGQYLAFEGKT-----                                            | HLQVQLSSSVKGH-----              |
| Mmus.VNSP2 | --PGQYSAFWGHT-----                                            | LFYIYDLPVKDH-----               |
| Mmus.MUP4  | --AGEYSVMYDGFN-----                                           | TFTILKTDYDN-----                |
| Mmus.MUP5  | --AGEYSVTYDGFN-----                                           | TFTILKTDYDN-----                |
| Mmus.mMUP  | --AGEYSVTYDGFN-----                                           | TFTIPKTDYDN-----                |
| Rnor.a2g1  | --DGEYFVEYDGGN-----                                           | TFTILKTDYDR-----                |
| Rnor.a2g3  | --DGEYFVEYDGEN-----                                           | TFTILKTDYDN-----                |
| Hsap.Lcn9  | --NGEYSINYEQON-----                                           | TVAVSETDYRL-----                |
| Cfam.f2p   | --SNKFDLEYWGHN-----                                           | DLYLAEVDPKS-----                |
| Tvul.Lip   | --ARQFKLNYYGTN-----                                           | DVYYGSSKPNE-----                |
| Ccri.Aphr  | --NGTYQTQFEGN-----                                            | NIFQPLYITSD-----                |
| Rnor.OBP1  | --DGRYTTDYSGRN-----                                           | YFHVLLKTTDD-----                |
| Mmus.Pbas  | --QEVYYAQYEGS-----                                            | IAFMLKMNVEK-----                |
| Rnor.Pbas  | --QDVYYAKYEGS-----                                            | TAFMLKTVNEK-----                |
| Btau.alle  | -EGYVYVLEFYGTN-----                                           | TLEVIHVTSEN-----                |
| Btau.BLB   | KIPAVFKIDALNE-----                                            | NKVLVLDTDYKK-----               |
| Sscr.BLB   | DIPAVFKINALDE-----                                            | NQLFLLDTDYDS-----               |
| Hsap.PP14  | GNPKKFKINYTVAN-----                                           | EATLLDTDYDN-----                |
| Mmus.A1mg  | -IDGKFLYHKSKWN-----                                           | ITLESYVVHTNYDE-----             |
| Hsap.A1mg  | --DGKFLYHKSKWN-----                                           | ITMESYVVHTNYDE-----             |
| Xlae.A1mg  | --PGKFDYFNARWG-----                                           | TTIQNYIVFTNYNE-----             |
| Ssal.A1mg  | --PGRLTYHIAKWG-----                                           | ADVDAVVVDNTNYDE-----            |
| Ppla.A1mg  | -TPGRIFYHIDRWD-----                                           | ADVDAVVVHTNYDE-----             |
| Hsap.C8GC  | -VLGRFLLQARGAR-----                                           | GAVHVVAETDYQS-----              |
| Ocun.C8GC  | -VPGRFLLPARGPR-----                                           | GAVHVVAEETDYHS-----             |
| Xlae.cp11  | EQLGGFRAKSPRYG-----                                           | SEHDMRVVETNYDE-----             |
| Bmar.lip   | EQPGRFLSKSPRYG-----                                           | SDHVIRVVEVSNYDE-----            |
| Mmus.PGDS  | GAPGHYTYSSPHSG-----                                           | SIHVSVVEANYDE-----              |
| Hsap.PGDS  | GSLGSYSYRSPHWG-----                                           | STYSVSVVETDYDQ-----             |
| Mmus.NGAL  | SRAGQFTLGNMHRYP-----                                          | QVQSYNVQVATTDYNQ-----           |
| Hsap.NGAL  | CQPGEFTLGNIKSYP-----                                          | GLTSYLVRVSTNYNQ-----            |

Hsap.Lcn12 --PGQFTVDH-GVEPG-----ADREETRVVDSDYTQ-----  
Mmus.Lcn12 --PGQFTRDNRGSGP-----GADRENIQVIETDYIT-----  
DhLip ---SKLKVSFLPKAIRFLP-----IGRGDYWILKIDDN-----  
Cfre.OML --TAALKVSFFG-----P-----FYGGYNVIALDRE-----  
Ecol.OML --RAALKVSFFG-----P-----FYGGYNVIALDRE-----  
Vcho.Lpro --DGYLKVSFFG-----P-----FYGSYVVFELDREN-----  
Ddis.Lip --EGMLKVSFFG-----P-----FYSGYNVIAIDPD-----  
Dmel.Lip -----LAVAFYP---TQP-----LTKANYLVLGTDYES-----  
Gmel.Gall --KLLVTLTYGAVNR-----ESPLNVIATDYQN-----  
Pbra.Bbp ---IYHKLTYGGVTK-----ENVFNLSTDNKN-----  
Msex.IcyA QGKYVMTFKFGPR-----VVVQVPWVLATDYKN-----  
Hgam.CRC2 --AAHMLIDAPSVF-----AAPYEVIETDYET-----  
Hgam.CRC1 ----HLSIDYENS-----FAAPLVILETDYSN-----  
Mmus.Lcn13 --PGKYTAFHNTK-----VIHVEKTSVNEH-----  
Tvul.BL EKPAEFEIYIPSES-----ASYTLSVMETDYDN-----  
Mmus.Lcn11 --PGQYTFEYQGRN-----SLTFVHVHTED-----  
GvBLC -APGKLLITFEGSP-----VAEDYWIIDLVEDPNNNSAG--  
Btau.OBP -DDGTIVADYEQN-----VFKIVLSLRT-----  
MgLip -AKGALRVQFPQPQP-----ACSGPNYVVQDYTG-----  
Same.Laz --DGKLSVHFPN-----SPS-----VGNYWILSTDYDN-----  
Tvul.LLP --PRKITMNRRLR-----YTCAAVRTSKQK-----  
Ecab.p19p --KFQYTVNHSG-----HKTIFLEKVDPKH-----  
Ggal.QS-21 -DDGELYSEEA-----EKTVEVLDTDYKS-----  
Hsap.Lcn5 ----GWVFENPSIG-----VLELWVLATNFRD-----  
Mmus.Lcn8 --VGEFAPFPGNRE-----IHVLDTDYER-----  
Mmus.ERBP --SAKYKVTRISGEK-----EVLVVDYDMT-----  
Lviv.ESP --PGVFKFTGGEIR-----MMDIDYEK-----  
PyLip --PGKLGVPFGAP-----FPAPYWINLAGSKEDG---Y

Mmus.a1GP -FMLAFDLKDEKK-----RGLSLN-AKRPDIT-  
Rnor.a1GP -FMLAFNLTDEN-----RGLSFY-AKKPDL-  
Hsap.a1GP -YMLAFDVNDEKN-----WGLSVY-ADKPETT-  
Ocun.a1GP -FLLVFFAGKEQD-----KGMSFY-TDKPKAS-  
Hsap.RBP -YAVQYSCR-----LLNLDGTCADSYSFVFS--RDPNGL-  
Ggal.RBP -YALHYSCR-----ELNEDGTCADSYSFVFS--RDPKGL-  
Xlae.RBP -YAITIYACR-----RRNLDGTCRDSYSFVFS--RDINGL-  
Omyc.RBP1 -YAIHYSCR-----EVDLDGTCLDGYSFIF- --RHPTGL-  
Ggal.Purp -YAITIYACR-----SLKEDGSCDDGYSLIFS--RNPRGL-  
TaTIL-1 -YQYALVGEP-----RRKSLWILC--RKTHIE-  
AtTIL -YQHALIGQP-----SRSYLWILS--RTAQME-  
TaTIL-2 -YQFALVGQP-----SRNYLWILC--RQPQMDS  
AtZEP -KMQWYAFHEEPAGGADAPNGMKRLEIFDGWCDNVLDLLHATEEEAILR--RDIYDR-  
OsZEP -KMQWYAFHKEPAGGTDPENGKNRLLLEIFNGWCDNVLDLINATDEEAILR--RDIYDRP  
TaVDE -GAVVYTRSKELPETIVPEL-----ERATKSVGRDFSTFI---RTDNTCG  
AtVDE -GAVVYTRSSVLPNSIIPPEL-----EKAAKSIGRDFSTFI---RTDNTCG  
TaCHL ---YAVVSGAK-----DTSFIQIYS--RTPNPG-  
AtCHL ---YALVSGAK-----DKGFVQVYS--RTPNPG-  
Mmus.ApoD -YALVYSCT-----TFFW--LFHVDFFWILG--RNPYLP-  
Hsap.ApoD -YALVYSCT-----CIIQ--LFHVDFAWILA--RNPNLP-  
Sscr.VEG -YILYCEGELDG-----QEVRMAKLV-GRDPENN-  
Cfam.f1p -YILYCEGELHG-----RQIRMAKLL-GRDPEQSQ  
Rnor.VEG2 -YIFYYEGKIHR-----HHFQIAKLV-GRNPEINQ  
Hsap.VEG -YIFYCEGELHG-----KPVRGVKLV-GRDPKNNL  
Mmus.VNSP1 -YMLYCDGEIEG-----MRFLMTQLI-GRDPQENL  
Mmus.VNSP2 -YIIYCESHPFQ-----KISQFGYLI-GKYPEENQ  
Mmus.MUP4 -YIMFHLINKEKD-----KTFQLMELY-GRKADLNS

|            |                                            |
|------------|--------------------------------------------|
| Mmus.MUP5  | -YIMFHLINKKDE-----ENFQLMELF-GREPDLS        |
| Mmus.MUP   | -FLMAHLINENDG-----ETFQLMGLY-GREPDLS        |
| Mmus.mMUP  | -YIMIHLINKKDG-----KTFQLMELY-GREPDLSL       |
| Rnor.a2g1  | -YVMFHLINFKNG-----ETFQAMVLY-GRTKDLSS       |
| Rnor.a2g3  | -YVMFHLVNVNNG-----ETFQLMELY-GRTKDLSS       |
| Hsap.Lcn9  | -FITFHLQNFRNG-----TETHTLALY-----           |
| Cfam.f2p   | -YLILYMINQYND-----DTSLVAHLM-VRDLSRQQ       |
| Tvul.Lip   | -YAKFIFYNYHDG-----KVN VANLF-GRTPNLSN       |
| Ccri.Aphr  | -KIFFTNKNM DRAG-----QETNMIVVA-GKGNALTP     |
| Rnor.OBP1  | -I IFFHNVNVD ES-----GRRQCDLVA-GKREDLNK     |
| Mmus.Pbas  | -ILLFHYFNKNRR-----NDVTRVAGVL-AGK-KLNK      |
| Rnor.Pbas  | -ILLFDYFNRRR-----NDVTRVAGVL-AGKRLTK        |
| Btau.alle  | -MLVTYVENYDGE-----RITKMTEGL-AKGT SFTP      |
| Btau.BLB   | -YLLFCMENSAE-----PEQSLACQCL-VRTPEVDD       |
| Sscr.BLB   | -HLLLCMENSAS-----PEHSLVCQSL-ARTLEVDD       |
| Hsap.PP14  | -FLFLC LQD T TTP-----IQSMM CQYL-ARVLVEDD   |
| Mmus.Almg  | -YAI FLTKKSSH-----HGLTITAKLY-GREPQLRD      |
| Hsap.Almg  | -YAI FLTKKFSRH-----HGPTITAKLY-GRAPQLRE     |
| Xlae.Almg  | -YVIMQMRKKKGS-----ETTTTVKLY-GRSPDLRP       |
| Ssal.Almg  | -YAI VMLSKQKTG-----GEKTKSAKLY-SRTMELPP     |
| Ppla.Almg  | -YAI I I M SKQKTS-----GENSTSLKLY-SRTMSVRD  |
| Hsap.C8GC  | -FAVLYLERAG-----QLSVKLY-ARSLPVSD           |
| Ocun.C8GC  | -FAVLYLERAR-----QLSVKLY-VRSLPVSD           |
| Xlae.cpl1  | -YILMYTVKTKGS-----ETNQIVSLF-GRDKDLRP       |
| Bmar.lip   | -YTLMHTIKTKGN-----EVNTIVSLF-GRRKTLSP       |
| Mmus.PGDS  | -YALLFSRGTKGP-----GQDFRMATLY-SRTQTLKD      |
| Hsap.PGDS  | -YALLYSQGSKGP-----GEDFRMATLY-SRTQTPRA      |
| Mmus.NGAL  | -FAMVFFRKTS EN-----KQYFKITLY-GRTKELSP      |
| Hsap.NGAL  | -HAMVFFKKV SQN-----REYFKITLY-GRTKELTS      |
| Hsap.Lcn12 | -FALMLSRRHTSR-----LAVLRISLL-GRNWLLPP       |
| Mmus.Lcn12 | -FALVLSLRQTSS-----QNITRVSL-GRNWRLSH        |
| DhLip      | -YQTVLVGGP-----SRKYMWILS--RSQNHDE          |
| Cfre.OML   | -YRHALVCGP-----DRDYLWILS--RTPTISD          |
| Ecol.OML   | -YRHALVCGP-----DRDYLWILS--RTPTISD          |
| Vcho.Lpro  | -YSYAFVSGP-----NTEYLWLLS--RTPTVER          |
| Ddis.Lip   | -YKYALIAGQ-----SFDYMWILS--KEPTIPE          |
| Dmel.Lip   | -YAVVYSCT-----SVTP---LANFKIVWILT--RQREPSA  |
| Gmel.Gall  | -YAIAYTCK-----YDEK-SKSHNDSIWILS--RAKKLEG   |
| Pbra.Bbp   | -YIIGYYCK-----YDE-DKKGHQDFVWVLS--RSKVLTG   |
| Msex.IcyA  | -YAINYN CN-----YHP-DKKAHSIHAWVLS--RNKVLEG  |
| Hgam.CRC2  | -YSCVYSCI-----TTDN---YKSEFAFVFS--RTPQTS    |
| Hgam.CRC1  | -YACL YSCI-----DYN---FGYHSDFSFIFS--RSANLAD |
| Mmus.Lcn13 | -YIFYCEGRHNG-----TSSFGMGKLMG-RDSGENP       |
| Tvul.BL    | -YILGCLENVN YR-----EKMACAHY-ERRIE-EN       |
| Mmus.Lcn11 | -FAIMDLENQSEG-----GT                       |
| GvBLC      | DYAFAAIGG-----PNRDFIFIIS--RKPALET          |
| Btau.OBP   | -HLVAHNINVDKHG-----QTTELTGLF--VKLNVED      |
| MgLip      | DFALVQTYN-----FSTLFLVLS--RNQHPEE           |
| Same.Laz   | -YSIVWSCVKRP-----DSAASTEISWILL--RSRNSSN    |
| Tvul.LLP   | HWILVCPREFQG-----ETIRMAKLVG-PNTDKNP        |
| Ecab.p19p  | -FVIFCAHSMKHG-----KETVVVTLFS-RTPTVSP       |
| Ggal.QS-21 | -YAVIFATRVKDG-----RTLHMMRLYS-RSREVS        |
| Hsap.Lcn5  | -YAI I FTQLEFGD-----EPFNTVELYS-LTETASQ     |
| Mmus.Lcn8  | -YTILKLTLLWQG-----RNFHVLKYFT-RSLENED       |
| Mmus.ERBP  | -YTVIDITSLVAG-----AVHRAMKLYS-RSLDNNG       |
| Lviv.ESP   | -YLIMYMKKSTFE-----AMYLS-ARGSDVGD           |
| PyLip      | RVAVVYSCTSTG-----SFFSQGLFLLSRTPKLRY        |

Mmus.a1GP PEL-REVFQKAVTHVGMDESEIIFV-----DWKKDRCSQQEKQQLELEKETKKDPEE  
Rnor.a1GP PEL-RKIFQQAVKDVGMDESEIVFV-----DWTKDKCSEQQKQQLELEKETKKETKK  
Hsap.a1GP KEQ-LGEFYEALDCLRIPKSDVYVT-----DWKKDKCEPLEKQHEKERKQEEGES--  
Ocun.a1GP PEQ-LEEFYEALTCLGMNKTEVVYVT-----DWTKDLCEPLEKQHEEERKKEKAES--  
Hsap.RBP PPE-AQKIVRQRQEELCLARQ--YRLIVH-----NGYCDGRSERNLL-----  
Ggal.RBP PPE-AQKIVRQRQIDLCCLDRK--YRVIVH-----NGFCS-----  
Xlae.RBP PSE-SQRIVRRRQEQLCLDRK--YRVVVH-----NGYCETN-----  
Omyc.RBP1 RPE-DQKIVTDDKKKEICFLGK--YRRVGH-----TGFCES-----  
Ggal.Purp PPA-IQRIVRQKQEEICMSGQ--FQPVLQ-----SGAC-----  
TaTIL-1 EEVYNQLLEKAKEEGYDVAKL--HKTPQS-----DPPESDAAPTDSKGTWWFKSLFGK-  
AtTIL EETYKQLVEKAVEEGYDISKL--HKTPQS-----DTPPESNTAPEDSKGVWWFKSLFGK-  
TaTIL-2 EGVYEELVERAKEEGYDVSKL--RKTPHP-----EPTPESQDAPKDG-GLWWIKSLFGK-  
AtZEP PGFTWVGKGRVTLGLGDSIHAMQPNMGQG-----GCMAIEDSFQLALELDEAWKQSVETTTTP  
OsZEP PTFNWGKGRVTLGLGDSVHAMQPNLGQG-----GCMAIEDGYQLAVELEKSWQESAKSGTP  
TaVDE AE-PPLADRIERTVEKGEKLIIVDEVKEIEG---EIEGEVKELEREETLVKRLADGIME  
AtVDE PE-PALVERIEKTVEEGERIIVKEVEEIEE---EVEKEVEKVGRTMETLFRQLAEGFNE  
TaCHL PEF-IEKYKSYAAGFGYDLSKI-KDTPQD----CEVSSDQLAEMMSMPGMDQALTNQFP-  
AtCHL PEF-IAKYKNYLAQFGYDPEKI-KDTPQD----CEVTDALAAMMSMPGMEQTLTNQFP-  
Mmus.ApoD PET-ITYLKDILTNSGIDIEK--MTTDDQ-----ANCPDFL-----  
Hsap.ApoD PET-VDSLKNILTSNNIDVVK--MTVTDQ-----VNCPKLS-----  
Sscr.VEG PEA-LEEFKEVARAKGLNP-DIVR-----PQQSETCSPGGN-----  
Cfam.f1p EA-LEDFREFSRAKGLNQ-EILE-----LAQSETCSPGGQ-----  
Rnor.VEG2 EA-LEDFQNAVRAGGLNP-DNIFTFI-----PKQSETCPLGSN-----  
Hsap.VEG EA-LEDFEKAAGARGLST-ESIL--I-----PRQSETCSPGSD-----  
Mmus.VNSP1 EA-LEEFKVFTQIKGLVA-ENLV--I-----LEQMEKCEPESFYELPSRPSE-----  
Mmus.VNSP2 DT-LEVFKEFIQHKGFLO-EKIG--V-----PEQRDRCIPIHDSAHQDHKC-----  
Mmus.MUP4 DI-KEKFVKLCEEHGIIK-ENIID-----LTKTNRCLKARE-----  
Mmus.MUP5 DI-KEKFAKLCEEHGIVR-ENIID-----LSNANRCLQARE-----  
Mmus.MUP DI-KEKFAQLCEKHGILR-ENIID-----LSNANRCLQARE-----  
Mmus.mMUP DI-KEKFAKLCEEHGIIIR-ENIID-----LTNVNRCLEARE-----  
Rnor.a2g1 DI-KEKFAKLCEAHGITR-DNIID-----LTKTDHCLQARG-----  
Rnor.a2g3 DI-KEKFAKLCVAHGITR-DNIID-----LTKTDRCLQARG-----  
Hsap.Lcn9 -----ETCEKYGLGS-QNIID-----LTNKDPCYSKHYRSPRPPMRW-----  
Cfam.f2p DF-LPAFESVCEDIGLHK-DQIVV-----LSDDDRCQGSRD-----  
Tvul.Lip EI-KKRFEEDFMNRGFRR-ENILD-----ISEVDHC-----  
Ccri.Aphr EE-NEILVQFAHEKKIPV-ENILN-----ILATDTCPE-----  
Rnor.OBP1 AQ-KQELRKLAAEYNIIPN-ENTQH-----LVPTDTCNQ-----  
Mmus.Pbas EE-MTEFMNLVEEMGIEE-ENVQR-----IMDTDNCPSKIRISITD-----  
Rnor.Pbas DE-MTEYMNVEEMGIED-ENVQR-----VMDTDTCPNKIRIR-----  
Btau.alle EE-LEKYQQLNSERGVPN-ENIEN-----LIKTDNCP-----  
Btau.BLB EA-LEKFDKALKA--LPMHIRLSFNP-----TQLEEQCHI-----  
Sscr.BLB QI-REKFEDALKT--LSVPMR--ILP-----AQLEEQCRV-----  
Hsap.PP14 EI-MQGFIRAFRP--LPRHLWYLLDL-----KQMEEPCRF-----  
Mmus.A1mg SL-LQEFKDVALNVGISENSIIFMP-----DRGECVPGDREVEPTSAR-----  
Hsap.A1mg TL-LQDFRVVAQGVGIPEDSIFTMA-----DRGECVPGEQEPEPILIPRV-----  
Xlae.A1mg TL-LQDFRQFALAQGIPEDSIVMLP-----NNGECSPGEIE-----  
Ssal.A1mg TI-LEDFRRLVREQGMADDTIIIKQ-----NKGECVPGTEPVAAEPQPEITAP---  
Ppla.A1mg TV-LDDFKTLVRHQMSDDTIIIKQ-----NKGDCIPGEQVEEAPSQPEPK-----  
Hsap.C8GC SV-LSGFQQRVQEAHLTEDQIFYFP---KYGFCEAADQFHVLDVRR-----  
Ocun.C8GC SV-LGAFEQRVAQANLTQDQVLFPP---TYGFCEAADQFHILDEVRR-----  
Xlae.cpl1 EL-LDKFQNFQAKSQGLADDNIIILP-----HTDQCMTEA-----  
Bmar.lip EL-LDKFQQFAKEQGLTDDNIIILP-----QTDSCMSEV-----  
Mmus.PGDS EL-KEKFTTFSKAQGLTEEDIVFLP-----QPKCIE-----  
Hsap.PGDS EL-KEKFTAFCKAQGFTEEDTIVFLP-----QTDKCMTEQ-----  
Mmus.NGAL EL-KERFTRFAKSLGLKDDNIIIFSV-----PTDQCIDN-----

Hsap.NGAL EL-KENFIRFSKSLGLPENHIVFPV-----PIDQCIDG-----  
 Hsap.Lcn12 GT-LDQFICLGRAQGLSDDNIVFPDV---TGNMVHLQACWAVGTGPAGMSLVDPRGAGPS  
 Mmus.Lcn12 KT-IDKFICLTRTQNLTKDNFLFPDL---SDWLPDPQVC-----  
 DhLip IV-VQDYLDYAKEIGFDVSDI-IMTKQT-----NE-----  
 Cfre.OML EM-KQQMLAIATREGFEVVK--LIWVKQ-----PGA-----  
 Ecol.OML EV-KQEMLAVATREGFDVSK--FIWVQQ-----PGS-----  
 Vcho.Lpro GI-LDKFIEMSKERGFDTNR--LIYVQL-----Q-----  
 Ddis.Lip KI-KNSYLELAKSVGYDITK--LIWSKQ-----NENEN-----  
 Dmel.Lip EA-VDAARKILEDNDVSQAF--LIDTVQ-----KNCPRLDGNGTGLAGEDGLDVDDF  
 Gmel.Gall DA-KTAVDNYLKEHAKAIDA--SKLVQT----DFSEEACKFTSTSAVTEPQTKKQ-----  
 Pbra.Bbp EA-KTAVENYLIG-SPVVDSSQ--KLVYS---DFSEAACKVNN-----  
 Msex.IcyA NT-KEVVDNVLKTFSHLIDA--SKFMSN---EFSEAACQYSTTYSLTGPDRH-----  
 Hgam.CRC2 PA-VEKTAAVFNKNGVEFSK--FVPVSH-----TAECVYRA-----  
 Hgam.CRC1 QY-VKKCEAAAFKNINVDTR--FVKTVQ-----GSSCPYDTQKTL-----  
 Mmus.Lcn13 EA-MEEFKNFIKRMNLRLENMFVP-----EIGDKCVESD-----  
 Tvul.BL KG-MEEFKKIVRT--LTIPYTM-----IEAQTREMCRV-----  
 Mmus.Lcn11 TIVIEFHGRSLSTDELG-----  
 GvBLC YQDVLAYQGIVKRLQAQHFVVDALNSTP-----QPTSCTYKSQLPGGL-----  
 Btau.OBP ED-LEKFWKLTEDKGIKKNVFNLEN-----EDHPHPE-----  
 MgLip AV-LDAWIKRAGALGSDLSVKNKND-----QTNCSFT-----  
 Same.Laz MT-LERVEDELKNLQLDLNK-YTKTEQS-----AKYCA-----  
 Tvul.LLP KA-LEDFYRFIYRERFDK-RRIT-----PKQTEACAPEHA-----  
 Ecab.p19p DV-MWMFKKYCKTHGIHTSNIVDLT-----QTDRCCLHARH-----  
 Ggal.QS-21 TA-MAIFRKLARE--RNYTDEMVAVLPS-----QEECVDEV-----  
 Hsap.Lcn5 EA-MGLFTKWSRSLGFLSQ-----  
 Mmus.Lcn8 EPGFWLFREMTADQGLYMLARHGR-----CAELLKEGLV-----  
 Mmus.ERBP EA-LNNFQKIALKHGFSETDIHILKHD----LTCVNALQSGQI-----  
 Lviv.ESP DI-KEKFKKLVLEQNFPEAHIKYFN-----AEQCTPTAA-----  
 PyLip GVFEAVYWYVRVLARGIRFQKGNFVFLTP-----QGKSCTYRGDEGAKVVFQ-----

Mmus.a1GP GQA-----  
 Rnor.a1GP DP-----  
 Hsap.a1GP -----  
 Ocun.a1GP -----  
 Hsap.RBP -----  
 Ggal.RBP -----  
 Xlae.RBP -----  
 Omyc.RBP1 -----  
 Ggal.Purp -----  
 TaTIL-1 -----  
 AtTIL -----  
 TaTIL-2 -----  
 AtZEP VD-----VVSSLKRYEESRRLRVAI IHAMARMAAIMASTYKAYLGVGLGPLSFLTFRV  
 OsZEP MD-----IVSSLRRYEKERILRVSVIHGLARMAAIMATTYRPLYGVGLGPLSFLTCLR  
 TaVDE VKQDV-----MNFFQGLSKEEMEILDQLNLEATEVEELFSRSLPIRKLK-----  
 AtVDE LKQDE-----ENFVRELSKEEMEFLDEIKMEASEVEKLFGLKALPIRKVR-----  
 TaCHL ---DLKLLKSSVAFDPFTSVTQTLKKLAEVYFK-----  
 AtCHL ---DLGLRKSQVQFDPFTSVFETLKKLVPLYFK-----  
 Mmus.ApoD -----  
 Hsap.ApoD -----  
 Sscr.VEG -----  
 Cfam.f1p -----  
 Rnor.VEG2 -----  
 Hsap.VEG -----  
 Mmus.VNSP1 -----  
 Mmus.VNSP2 -----



|            |                                                              |
|------------|--------------------------------------------------------------|
| Mmus.MUP4  | -----                                                        |
| Mmus.MUP5  | -----                                                        |
| Mmus.MUP   | -----                                                        |
| Mmus.mMUP  | -----                                                        |
| Rnor.a2g1  | -----                                                        |
| Rnor.a2g3  | -----                                                        |
| Hsap.Lcn9  | -----                                                        |
| Cfam.f2p   | -----                                                        |
| Tvul.Lip   | -----                                                        |
| Ccri.Aphr  | -----                                                        |
| Rnor.OBP1  | -----                                                        |
| Mmus.Pbas  | -----                                                        |
| Rnor.Pbas  | -----                                                        |
| Btau.alle  | -----                                                        |
| Btau.BLB   | -----                                                        |
| Sscr.BLB   | -----                                                        |
| Hsap.PP14  | -----                                                        |
| Mmus.A1mg  | -----                                                        |
| Hsap.A1mg  | -----                                                        |
| Xlae.A1mg  | -----                                                        |
| Ssal.A1mg  | -----                                                        |
| Ppla.A1mg  | -----                                                        |
| Hsap.C8GC  | -----                                                        |
| Ocun.C8GC  | -----                                                        |
| Xlae.cpl1  | -----                                                        |
| Bmar.lip   | -----                                                        |
| Mmus.PGDS  | -----                                                        |
| Hsap.PGDS  | -----                                                        |
| Mmus.NGAL  | -----                                                        |
| Hsap.NGAL  | -----                                                        |
| Hsap.Lcn12 | V-YPGSSA---PACAQGSPGSWVPVLNPGSEPPPAAPGPLSWATSSHPGSPVPGHLLPPQ |
| Mmus.Lcn12 | -----                                                        |
| DhLip      | -----                                                        |
| Cfre.OML   | -----                                                        |
| Ecol.OML   | -----                                                        |
| Vcho.Lpro  | -----                                                        |
| Ddis.Lip   | -----                                                        |
| Dmel.Lip   | VSTTVPNAIEKA-----                                            |
| Gmel.Gall  | -----                                                        |
| Pbra.Bbp   | -----                                                        |
| Msex.IcyA  | -----                                                        |
| Hgam.CRC2  | -----                                                        |
| Hgam.CRC1  | -----                                                        |
| Mmus.Lcn13 | -----                                                        |
| Tvul.BL    | -----                                                        |
| Mmus.Lcn11 | -----                                                        |
| GvBLC      | -----                                                        |
| Btau.OBP   | -----                                                        |
| MgLip      | -----                                                        |
| Same.Laz   | -----                                                        |
| Tvul.LLP   | -----                                                        |
| Ecab.p19p  | -----                                                        |
| Ggal.QS-21 | -----                                                        |
| Hsap.Lcn5  | -----                                                        |
| Mmus.Lcn8  | -----                                                        |
| Mmus.ERBP  | -----                                                        |
| Lviv.ESP   | -----                                                        |

PyLip

-----  
Mmus.a1GP -----  
Rnor.a1GP -----  
Hsap.a1GP -----  
Ocun.a1GP -----  
Hsap.RBP -----  
Ggal.RBP -----  
Xlae.RBP -----  
Omyc.RBP1 -----  
Ggal.Purp -----  
TaTIL-1 -----  
AtTIL -----  
TaTIL-2 -----  
AtZEP PHPGRVGGRRFFVDIAMP SMLDWVLGGNSEKLGRRPPSCLRTDKADDRLREWFEDDDALER  
OsZEP PHPGRVGGRRFFIKYGMPLMLS SVLGGNSTKLEGRPLSCLRS DKANDQLRRWFEDDDALEQ  
TaVDE -----  
AtVDE -----  
TaCHL -----  
AtCHL -----  
Mmus.ApoD -----  
Hsap.ApoD -----  
Sscr.VEG -----  
Cfam.f1p -----  
Rnor.VEG2 -----  
Hsap.VEG -----  
Mmus.VNSP1 -----  
Mmus.VNSP2 -----  
Mmus.MUP4 -----  
Mmus.MUP5 -----  
Mmus.MUP -----  
Mmus.mMUP -----  
Rnor.a2g1 -----  
Rnor.a2g3 -----  
Hsap.Lcn9 -----  
Cfam.f2p -----  
Tvul.Lip -----  
Ccric.Aphr -----  
Rnor.OBP1 -----  
Mmus.Pbas -----  
Rnor.Pbas -----  
Btau.alle -----  
Btau.BLB -----  
Sscr.BLB -----  
Hsap.PP14 -----  
Mmus.A1mg -----  
Hsap.A1mg -----  
Xlae.A1mg -----  
Ssal.A1mg -----  
Ppla.A1mg -----  
Hsap.C8GC -----  
Ocun.C8GC -----  
Xlae.cpl1 -----  
Bmar.lip -----  
Mmus.PGDS -----  
Hsap.PGDS -----

Mmus.NGAL -----  
Hsap.NGAL -----  
Hsap.Lcn12 VPCPGPPPPAPPAPGPLSRPTSSHPGSPVLGYLLPPQVPCPGSPSPSGSPVLGHLLPSPI  
Mmus.Lcn12 -----  
DhLip -----  
Cfre.OML -----  
Ecol.OML -----  
Vcho.Lpro -----  
Ddis.Lip -----  
Dmel.Lip -----  
Gmel.Gall -----  
Pbra.Bbp -----  
Msex.IcyA -----  
Hgam.CRC2 -----  
Hgam.CRC1 -----  
Mmus.Lcn13 -----  
Tvul.BL -----  
Mmus.Lcn11 -----  
GvBLC -----  
Btau.OBP -----  
MgLip -----  
Same.Laz -----  
Tvul.LLP -----  
Ecab.p19p -----  
Ggal.QS-21 -----  
Hsap.Lcn5 -----  
Mmus.Lcn8 -----  
Mmus.ERBP -----  
Lviv.ESP -----  
PyLip -----

Mmus.a1GP -----  
Rnor.a1GP -----  
Hsap.a1GP -----  
Ocun.a1GP -----  
Hsap.RBP -----  
Ggal.RBP -----  
Xlae.RBP -----  
Omyc.RBP1 -----  
Ggal.Purp -----  
TaTIL-1 -----  
AtTIL -----  
TaTIL-2 -----  
AtZEP TIKGEWYLIPHGDDCCVSETLCLTKDEDQPCIVGSEPDQDFPGMRIVIPSSQVSKMHARV  
OsZEP AMGGEWYLLPT--SSGDSQPIRLIRDEKKSLSIGSRSDPSNSTASLALPLPQISENHATI  
TaVDE -----  
AtVDE -----  
TaCHL -----  
AtCHL -----  
Mmus.ApoD -----  
Hsap.ApoD -----  
Sscr.VEG -----  
Cfam.f1p -----  
Rnor.VEG2 -----  
Hsap.VEG -----  
Mmus.VNSP1 -----

|            |                                 |
|------------|---------------------------------|
| Mmus.VNSP2 | -----                           |
| Mmus.MUP4  | -----                           |
| Mmus.MUP5  | -----                           |
| Mmus.MUP   | -----                           |
| Mmus.mMUP  | -----                           |
| Rnor.a2g1  | -----                           |
| Rnor.a2g3  | -----                           |
| Hsap.Lcn9  | -----                           |
| Cfam.f2p   | -----                           |
| Tvul.Lip   | -----                           |
| Ccri.Aphr  | -----                           |
| Rnor.OBP1  | -----                           |
| Mmus.Pbas  | -----                           |
| Rnor.Pbas  | -----                           |
| Btau.alle  | -----                           |
| Btau.BLB   | -----                           |
| Sscr.BLB   | -----                           |
| Hsap.PP14  | -----                           |
| Mmus.A1mg  | -----                           |
| Hsap.A1mg  | -----                           |
| Xlae.A1mg  | -----                           |
| Ssal.A1mg  | -----                           |
| Ppla.A1mg  | -----                           |
| Hsap.C8GC  | -----                           |
| Ocun.C8GC  | -----                           |
| Xlae.cpl1  | -----                           |
| Bmar.lip   | -----                           |
| Mmus.PGDS  | -----                           |
| Hsap.PGDS  | -----                           |
| Mmus.NGAL  | -----                           |
| Hsap.NGAL  | -----                           |
| Hsap.Lcn12 | PAHKELGLIPGGALDLSSLPWVAAPA----- |
| Mmus.Lcn12 | -----                           |
| DhLip      | -----                           |
| Cfre.OML   | -----                           |
| Ecol.OML   | -----                           |
| Vcho.Lpro  | -----                           |
| Ddis.Lip   | -----                           |
| Dmel.Lip   | -----                           |
| Gmel.Gall  | -----                           |
| Pbra.Bbp   | -----                           |
| Msex.IcyA  | -----                           |
| Hgam.CRC2  | -----                           |
| Hgam.CRC1  | -----                           |
| Mmus.Lcn13 | -----                           |
| Tvul.BL    | -----                           |
| Mmus.Lcn11 | -----                           |
| GvBLC      | -----                           |
| Btau.OBP   | -----                           |
| MgLip      | -----                           |
| Same.Laz   | -----                           |
| Tvul.LLP   | -----                           |
| Ecab.p19p  | -----                           |
| Ggal.QS-21 | -----                           |
| Hsap.Lcn5  | -----                           |
| Mmus.Lcn8  | -----                           |
| Mmus.ERBP  | -----                           |

|            |                                                               |
|------------|---------------------------------------------------------------|
| Lviv.ESP   | -----                                                         |
| PyLip      | -----                                                         |
| Mmus.a1GP  | -----                                                         |
| Rnor.a1GP  | -----                                                         |
| Hsap.a1GP  | -----                                                         |
| Ocun.a1GP  | -----                                                         |
| Hsap.RBP   | -----                                                         |
| Ggal.RBP   | -----                                                         |
| Xlae.RBP   | -----                                                         |
| Omyc.RBP1  | -----                                                         |
| Ggal.Purp  | -----                                                         |
| TaTIL-1    | -----                                                         |
| AtTIL      | -----                                                         |
| TaTIL-2    | -----                                                         |
| AtZEP      | IYKDGAFFLMDLRSEHGTYVTDNEGRRYRATPNFPARFRSSDIIEFGSDKKA AFRVKVIR |
| OsZEP      | TCKNKAFYVTDNGSEHGTTWITDNEGRRYRRTSELPCFPFSLGCH-----            |
| TaVDE      | -----                                                         |
| AtVDE      | -----                                                         |
| TaCHL      | -----                                                         |
| AtCHL      | -----                                                         |
| Mmus.ApoD  | -----                                                         |
| Hsap.ApoD  | -----                                                         |
| Sscr.VEG   | -----                                                         |
| Cfam.f1p   | -----                                                         |
| Rnor.VEG2  | -----                                                         |
| Hsap.VEG   | -----                                                         |
| Mmus.VNSP1 | -----                                                         |
| Mmus.VNSP2 | -----                                                         |
| Mmus.MUP4  | -----                                                         |
| Mmus.MUP5  | -----                                                         |
| Mmus.MUP   | -----                                                         |
| Mmus.mMUP  | -----                                                         |
| Rnor.a2g1  | -----                                                         |
| Rnor.a2g3  | -----                                                         |
| Hsap.Lcn9  | -----                                                         |
| Cfam.f2p   | -----                                                         |
| Tvul.Lip   | -----                                                         |
| Ccri.Aphr  | -----                                                         |
| Rnor.OBP1  | -----                                                         |
| Mmus.Pbas  | -----                                                         |
| Rnor.Pbas  | -----                                                         |
| Btau.alle  | -----                                                         |
| Btau.BLB   | -----                                                         |
| Sscr.BLB   | -----                                                         |
| Hsap.PP14  | -----                                                         |
| Mmus.A1mg  | -----                                                         |
| Hsap.A1mg  | -----                                                         |
| Xlae.A1mg  | -----                                                         |
| Ssal.A1mg  | -----                                                         |
| Ppla.A1mg  | -----                                                         |
| Hsap.C8GC  | -----                                                         |
| Ocun.C8GC  | -----                                                         |
| Xlae.cpl1  | -----                                                         |
| Bmar.lip   | -----                                                         |
| Mmus.PGDS  | -----                                                         |

|            |       |
|------------|-------|
| Hsap.PGDS  | ----- |
| Mmus.NGAL  | ----- |
| Hsap.NGAL  | ----- |
| Hsap.Lcn12 | ----- |
| Mmus.Lcn12 | ----- |
| DhLip      | ----- |
| Cfre.OML   | ----- |
| Ecol.OML   | ----- |
| Vcho.Lpro  | ----- |
| Ddis.Lip   | ----- |
| Dmel.Lip   | ----- |
| Gmel.Gall  | ----- |
| Pbra.Bbp   | ----- |
| Msex.IcyA  | ----- |
| Hgam.CRC2  | ----- |
| Hgam.CRC1  | ----- |
| Mmus.Lcn13 | ----- |
| Tvul.BL    | ----- |
| Mmus.Lcn11 | ----- |
| GvBLC      | ----- |
| Btau.OBP   | ----- |
| MgLip      | ----- |
| Same.Laz   | ----- |
| Tvul.LLP   | ----- |
| Ecab.p19p  | ----- |
| Ggal.QS-21 | ----- |
| Hsap.Lcn5  | ----- |
| Mmus.Lcn8  | ----- |
| Mmus.ERBP  | ----- |
| Lviv.ESP   | ----- |
| PyLip      | ----- |

|           |                      |
|-----------|----------------------|
| Mmus.a1GP | -----                |
| Rnor.a1GP | -----                |
| Hsap.a1GP | -----                |
| Ocun.a1GP | -----                |
| Hsap.RBP  | -----                |
| Ggal.RBP  | -----                |
| Xlae.RBP  | -----                |
| Omyc.RBP1 | -----                |
| Ggal.Purp | -----                |
| TaTIL-1   | -----                |
| AtTIL     | -----                |
| TaTIL-2   | -----                |
| AtZEP     | KTPKSTRKNESNNDKLLQTA |
| OsZEP     | -----                |
| TaVDE     | -----                |
| AtVDE     | -----                |
| TaCHL     | -----                |
| AtCHL     | -----                |
| Mmus.ApoD | -----                |
| Hsap.ApoD | -----                |
| Sscr.VEG  | -----                |
| Cfam.f1p  | -----                |
| Rnor.VEG2 | -----                |
| Hsap.VEG  | -----                |

|            |       |
|------------|-------|
| Mmus.VNSP1 | ----- |
| Mmus.VNSP2 | ----- |
| Mmus.MUP4  | ----- |
| Mmus.MUP5  | ----- |
| Mmus.MUP   | ----- |
| Mmus.mMUP  | ----- |
| Rnor.a2g1  | ----- |
| Rnor.a2g3  | ----- |
| Hsap.Lcn9  | ----- |
| Cfam.f2p   | ----- |
| Tvul.Lip   | ----- |
| Ccri.Aphr  | ----- |
| Rnor.OBP1  | ----- |
| Mmus.Pbas  | ----- |
| Rnor.Pbas  | ----- |
| Btau.alle  | ----- |
| Btau.BLB   | ----- |
| Sscr.BLB   | ----- |
| Hsap.PP14  | ----- |
| Mmus.A1mg  | ----- |
| Hsap.A1mg  | ----- |
| Xlae.A1mg  | ----- |
| Ssal.A1mg  | ----- |
| Ppla.A1mg  | ----- |
| Hsap.C8GC  | ----- |
| Ocun.C8GC  | ----- |
| Xlae.cpl1  | ----- |
| Bmar.lip   | ----- |
| Mmus.PGDS  | ----- |
| Hsap.PGDS  | ----- |
| Mmus.NGAL  | ----- |
| Hsap.NGAL  | ----- |
| Hsap.Lcn12 | ----- |
| Mmus.Lcn12 | ----- |
| DhLip      | ----- |
| Cfre.OML   | ----- |
| Ecol.OML   | ----- |
| Vcho.Lpro  | ----- |
| Ddis.Lip   | ----- |
| Dmel.Lip   | ----- |
| Gmel.Gall  | ----- |
| Pbra.Bbp   | ----- |
| Msex.IcyA  | ----- |
| Hgam.CRC2  | ----- |
| Hgam.CRC1  | ----- |
| Mmus.Lcn13 | ----- |
| Tvul.BL    | ----- |
| Mmus.Lcn11 | ----- |
| GvBLC      | ----- |
| Btau.OBP   | ----- |
| MgLip      | ----- |
| Same.Laz   | ----- |
| Tvul.LLP   | ----- |
| Ecab.p19p  | ----- |
| Ggal.QS-21 | ----- |
| Hsap.Lcn5  | ----- |
| Mmus.Lcn8  | ----- |

Mmus.ERBP -----  
Lviv.ESP -----  
PyLip -----

Supplemental Figure 7. Multiple sequence alignment of plant lipocalins, plant lipocalin-like proteins and other selected lipocalins. The alignment was generated using CLUSTAL X v.1.83.



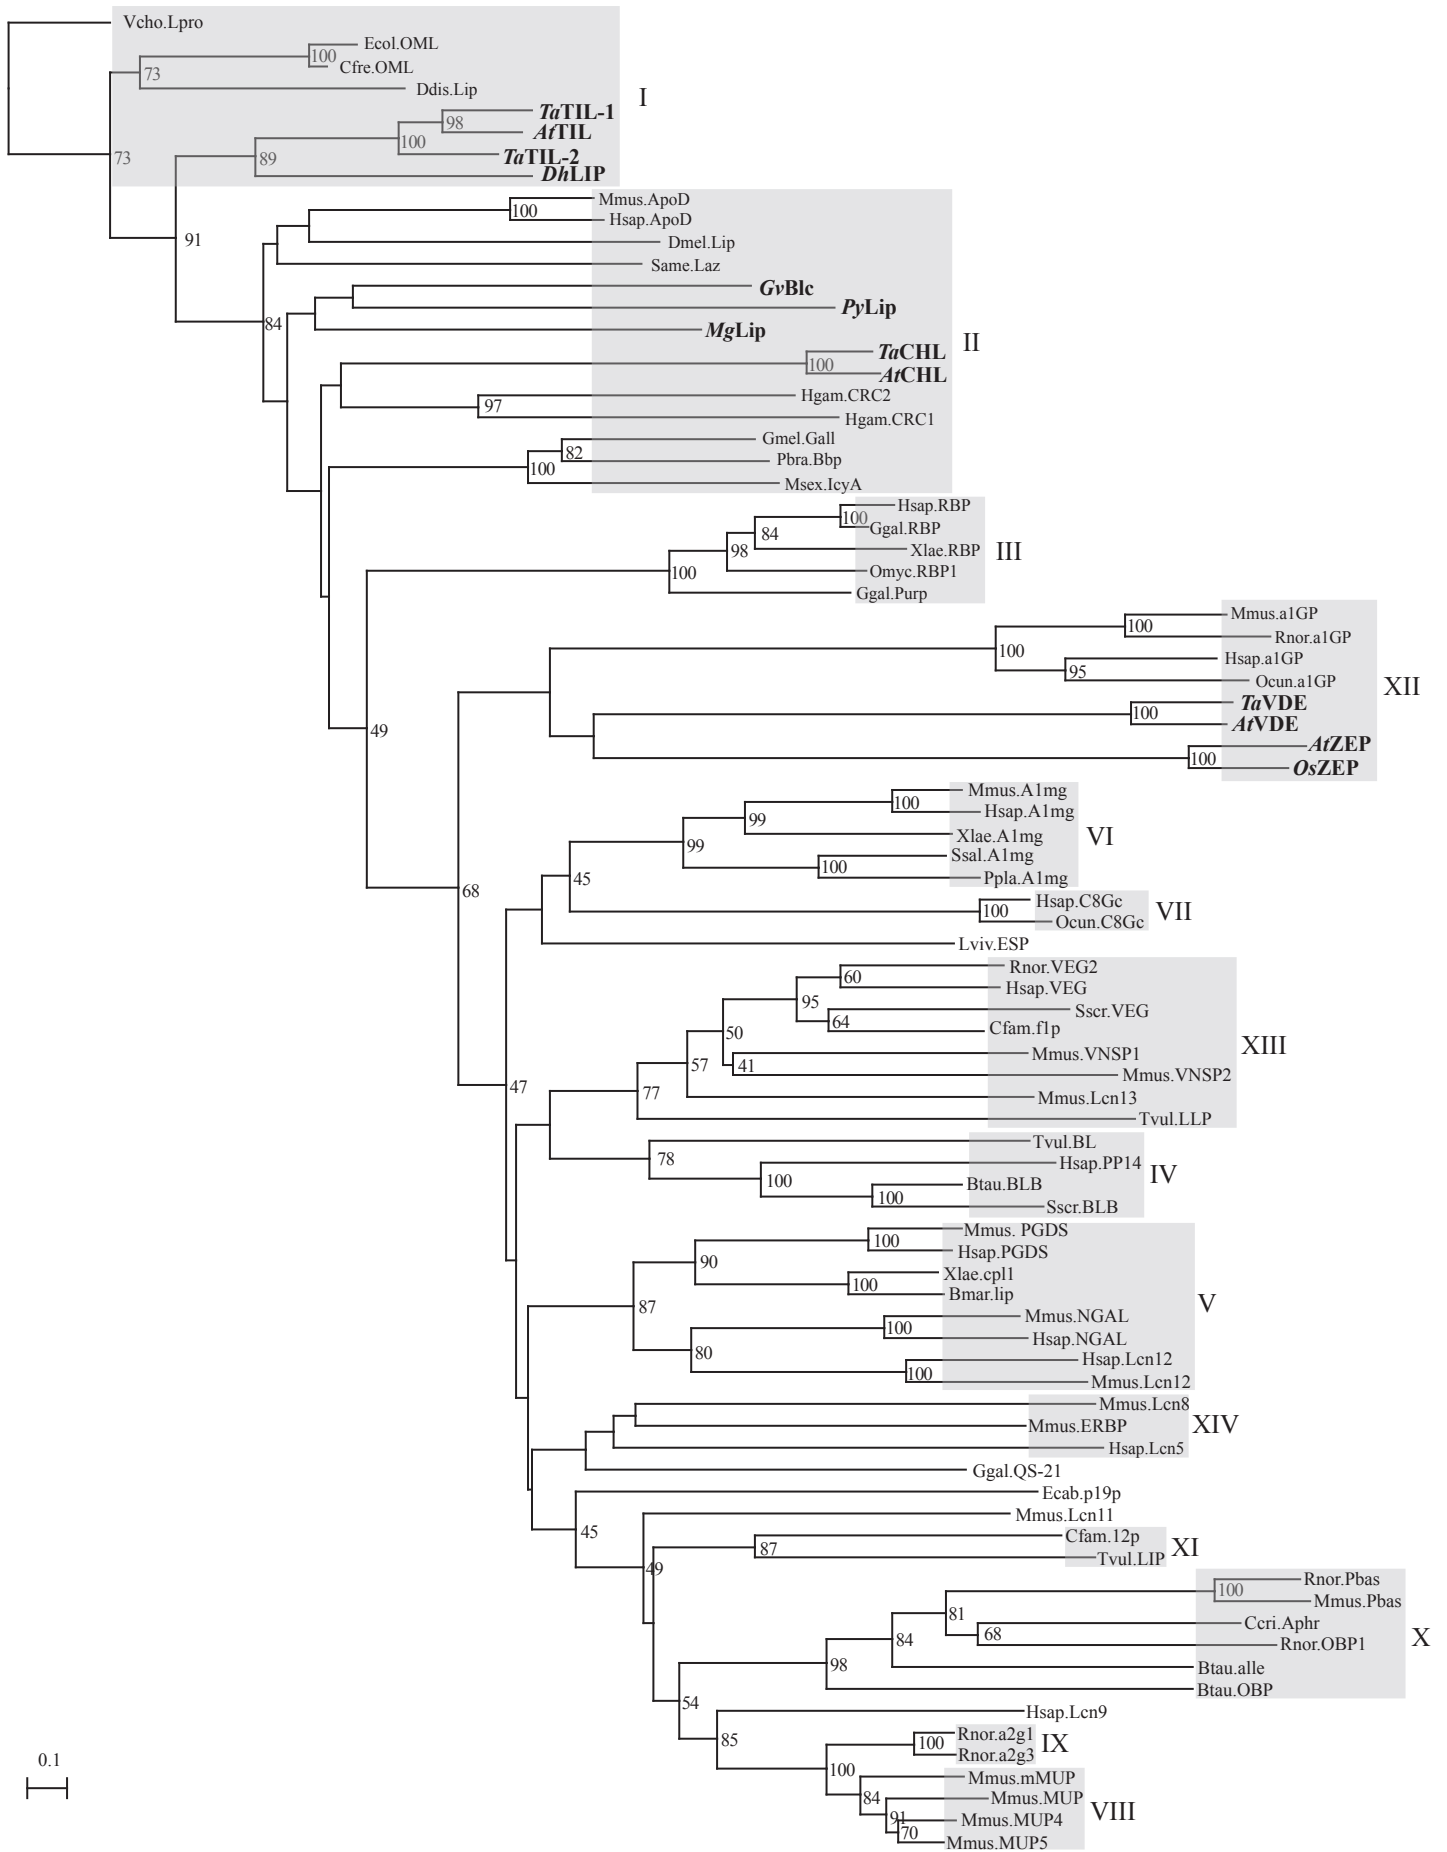

Supplemental Figure 8. Phylogenetic analysis of selected lipocalins using the Neighbor-Joining method.

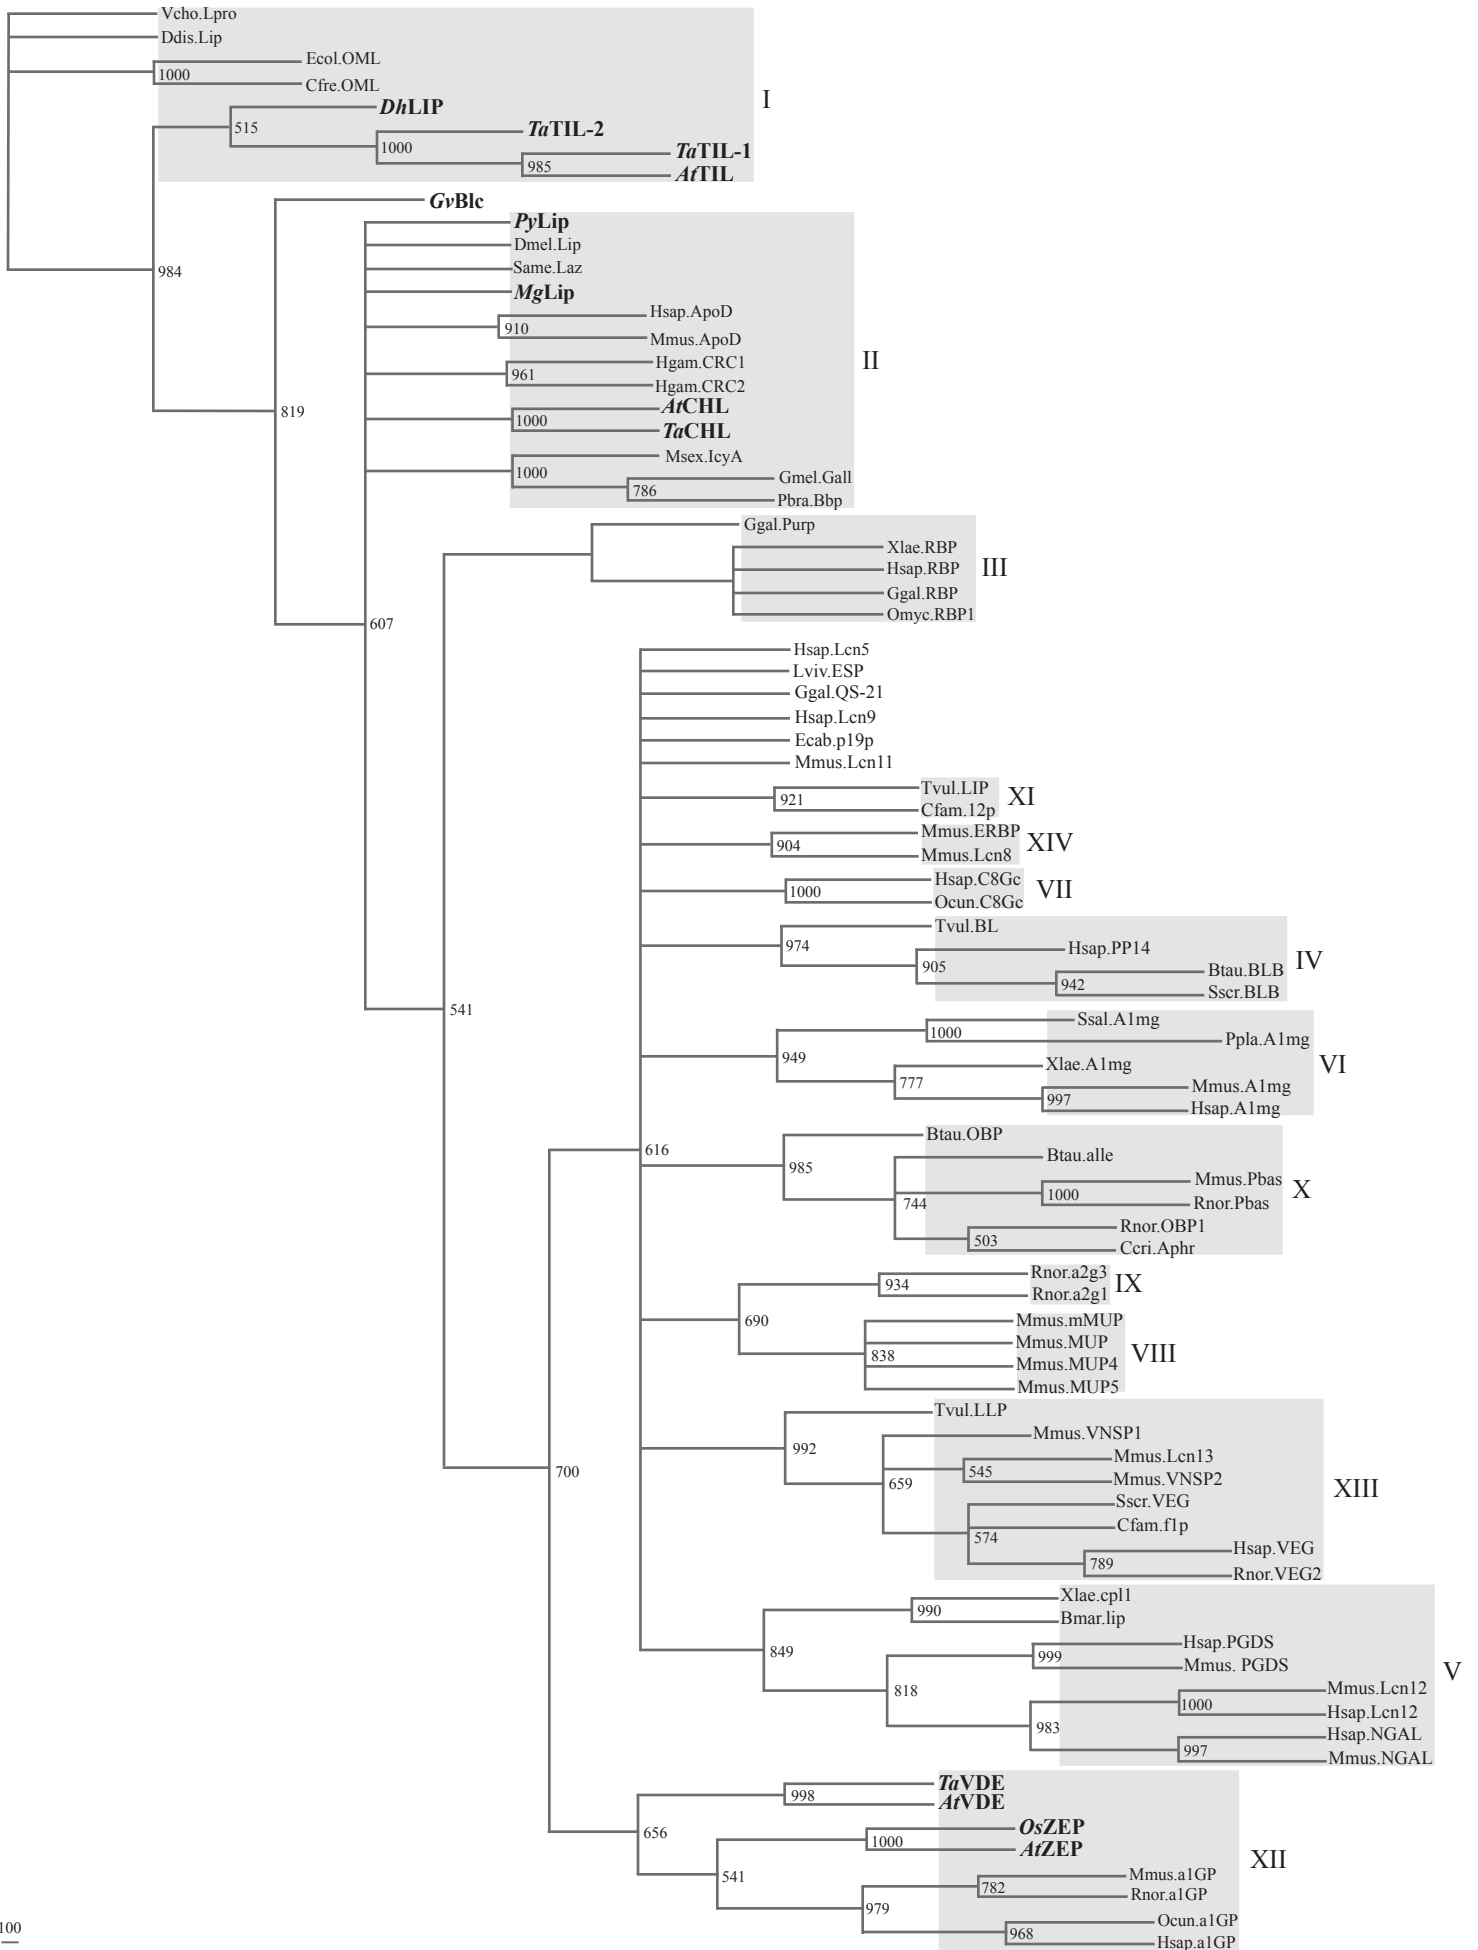

Supplemental Figure 9. Phylogenetic analysis of selected lipocalins using the maximum likelihood method.
