# Supplementary material
Source: PubMed Central journal article supplement (PMC1310578)
Supplement: plntphys_pp.105.070466_2.pdf [file plntphys_pp.105.070466_2.pdf]

Supplemental Table I. Primer sequences used in cellular localization and Real-Time PCR experiments.

| Primer Name        | Direction | Primer Sequence                           | Amplicon Size (bp) |
|--------------------|-----------|-------------------------------------------|--------------------|
| <i>AtTIL-F1</i>    | Forward   | 5'-CAATCTAGAACTATTTGCCGAAGAGAGA-3'        | 560                |
| <i>AtTIL-R1</i>    | Reverse   | 5'-GCAGATCTATGACAGAGAGAAGAAAGAGATG-3'     |                    |
| <i>AtTIL-F2</i>    | Forward   | 5'-TACCATGGTGACAGAGAAGAAAGAGATG-3'        | 560                |
| <i>AtTIL-R2</i>    | Reverse   | 5'-TACCCATGGATTTGCCGAAGAGAGA-3'           |                    |
| <i>AtTIL-F2</i>    | Forward   | 5'-TACCATGGTGACAGAGAAGAAAGAGATG-3'        | 460                |
| <i>AtTIL-R3</i>    | Reverse   | 5'-TACCATGGCACTCTGAGGAGTCTTGTG-3'         |                    |
| <i>AtTIL-F3</i>    | Forward   | 5'-ATAGATCTGACACACCACCTGAGTCC-3'          | 100                |
| <i>AtTIL-R4</i>    | Reverse   | 5'-CAATCTAGAACTATTTGCCGAAGAGAGA-3'        |                    |
| <i>TaTIL-1</i> FAM | Forward   | 5'-CACGTCAAGGAGGAAGGCTACGACG[FAM]G-3'     | 131                |
| <i>TaTIL-1</i>     | Reverse   | 5'-CATTTACCAAAGAGCGACTTGAACC-3'           |                    |
| <i>TaTIL-2</i>     | Forward   | 5'-TACATGGGCCGGTGGTACG-3'                 | 43                 |
| <i>TaTIL-2</i> FAM | Reverse   | 5'-GATCGGACGGGAAGCACGCGA[FAM]C-3'         |                    |
| <i>TaCHL</i>       | Forward   | 5'-GCAAAGGACACCAGCTTTATTCAGATATAC-3'      | 175                |
| <i>TaCHL</i> FAM   | Reverse   | 5'-GACCAGACATCATCTCCGCAAGCTGG[FAM]C-3'    |                    |
| <i>TaVDE</i>       | Forward   | 5'-GCTCAAGGAATGCAGGATCGAG-3'              | 63                 |
| <i>TaVDE</i> FAM   | Reverse   | 5'-CAACCTGCTGCACATGATGGG[FAM]TG 3'        |                    |
| <i>TaZEP</i> FAM   | Forward   | 5'-CAGCATGTTGGAATGCCTTTGATGC[FAM]G-3'     | 59                 |
| <i>TaZEP</i>       | Reverse   | 5'-AGCTTTGAGCTGTTGCCACCT-3'               |                    |
| 18S RNA JOE        | Forward   | 5'-GAACATCGGTCTGTGATGCCCTTAGATG[JOE]TC-3' | 83                 |
| 18S RNA            | Reverse   | 5'-GGCCAAGGCTATATACTCGTTGAATAC-3'         |                    |

Supplemental Table II. Lipocalins and lipocalin-like proteins used for the alignment (suppl. fig. 7).

| Protein                         | Species                         | Abbreviation | Accession numbers* | Clade |
|---------------------------------|---------------------------------|--------------|--------------------|-------|
| Outer membrane lipoprotein      | <i>Vibrio cholerae</i>          | Vcho.Lpro    | X64097             | I     |
| Outer membrane lipoprotein      | <i>Escherichia coli</i>         | Ecol.OML     | AE000487           | I     |
| Outer membrane lipoprotein      | <i>Citrobacter freundii</i>     | Cfre.OML     | U21727             | I     |
| Outer membrane lipoprotein      | <i>Gloeobacter violaceus</i>    | Gv Blc       | BAC88907           | I     |
| Putative lipocalin              | <i>Dictyostelium discoideum</i> | Ddis.Lip     | C24642             | I     |
| Lipocalin                       | <i>Debaryomyces hansenii</i>    | Dh Lip       | CAG88663           | I     |
| Temperature induced lipocalin 2 | <i>Triticum aestivum</i>        | Ta TIL-2     |                    | I     |
| Temperature induced lipocalin 1 | <i>Triticum aestivum</i>        | Ta TIL-1     | AAL75812           | I     |
| Temperature induced lipocalin   | <i>Arabidopsis thaliana</i>     | At TIL       | BAB10998           | I     |
| Lipocalin                       | <i>Porphira yezoensis</i>       | Py Lip       |                    | II    |
| Outer membrane lipoprotein      | <i>Magnaporthe grisea</i>       | Mg Blc       | EAA51774           | II    |
| Schistocerca americana          | <i>Schistocerca americana</i>   | Same.Laz     | U15656             | II    |
| Lipocalin                       | <i>Drosophila melanogaster</i>  | Dmel.Lip     | AC004439           | II    |
| Lipocalin                       | <i>Arabidopsis thaliana</i>     | At CHL       | AAK59669           | II    |
| Lipocalin                       | <i>Triticum aestivum</i>        | Ta CHL       |                    | II    |
| Crustacyanin 1                  | <i>Homarus gammarus</i>         | Hgam.CRC2    | P80007             | II    |
| Crustacyanin 2                  | <i>Homarus gammarus</i>         | Hgam.CRC1    | P80029             | II    |
| Insecticyanin A                 | <i>Manduca sexta</i>            | Msex.IcyA    | X64714             | II    |
| Galleria mellonella             | <i>Galleria mellonella</i>      | Gmel.Gall    | X64715             | II    |
| Bilin-binding protein           | <i>Pieris brassicae</i>         | Pbra.Bbp     | X76568             | II    |
| Apolipoprotein D                | <i>Mus musculus</i>             | Mmus.ApoD    | X82648             | II    |
| Apolipoprotein D                | <i>Homo sapiens</i>             | Hsap.ApoD    | J02611             | II    |
| Purpurin                        | <i>Gallus gallus</i>            | Ggal.Purp    | M17538             | III   |
| Retinol-binding protein         | <i>Xenopus laevis</i>           | Xlae.RBP     | J02718             | III   |
| Retinol-binding protein         | <i>Oncorhynchus mykiss</i>      | Omyc.RBP1    | P24774             | III   |
| Retinol-binding protein         | <i>Gallus gallus</i>            | Ggal.RBP     | X77960             | III   |
| Retinol-binding protein         | <i>Homo sapiens</i>             | Hsap.RBP     | X00129             | III   |
| Beta-lactoglobulin              | <i>Trichosurus vulpecula</i>    | Tvul.BL      | U34289             | IV    |
| Pregnancy protein 14            | <i>Homo sapiens</i>             | Hsap.PP14    | M61886             | IV    |
| Beta-lactoglobulin B            | <i>Bos taurus</i>               | Btau.BLB     | X14712             | IV    |
| Beta-lactoglobulin B            | <i>Sus scrofa</i>               | Sscr.BLB     | X54976             | IV    |
| Epididymal secretory protein    | <i>Mus musculus</i>             | Mmus.Lcn11   | AAQ81972           | M     |
| Endometrial P19 protein         | <i>Equus caballus</i>           | Ecab.p19p    | X98459             | M     |
| Epididymal secretory protein    | <i>Homo sapiens</i>             | Hsap.Lcn9    | AAQ81975           | M     |
| Epididymal secretory protein    | <i>Lacerta vivipara</i>         | Lviv.ESP     | X63151             | M     |
| Quiescence-specific protein 21  | <i>Gallus gallus</i>            | Ggal.QS-21   | M55644             | V/M   |
| Choroid plexus lipocalin 1      | <i>Xenopus laevis</i>           | Xlae.cpl1    | X84414             | V     |
| Choroid plexus lipocalin        | <i>Bufo marinus</i>             | Bmar.lip     | Q01584             | V     |
| Prostaglandin D synthase        | <i>Homo sapiens</i>             | Hsap.PGDS    | M61900             | V     |
| Prostaglandin D synthase        | <i>Mus musculus</i>             | Mmus.PGDS    | X89222             | V     |
| Epididymal secretory protein    | <i>Mus musculus</i>             | Mmus.Lcn12   | AAQ63836           | V     |
| Epididymal secretory protein    | <i>Homo sapiens</i>             | Hsap.Lcn12   | BC041168           | V     |
| Neutrophil gelatinase lipocalin | <i>Homo sapiens</i>             | Hsap.NGAL    | X83006             | V     |
| Neutrophil gelatinase lipocalin | <i>Mus musculus</i>             | Mmus.NGAL    | P11672             | V     |
| Alpha-1 microglobulin           | <i>Xenopus laevis</i>           | Xlae.A1mg    | D87752             | VI    |
| Alpha-1 microglobulin           | <i>Mus musculus</i>             | Mmus.A1mg    | D28812             | VI    |
| Alpha-1 microglobulin           | <i>Homo sapiens</i>             | Hsap.A1mg    | X04494             | VI    |

|                                          |                              |            |          |       |
|------------------------------------------|------------------------------|------------|----------|-------|
| Alpha-1 microglobulin                    | <i>Salmo salar</i>           | Ssal.A1mg  | L26598   | VI    |
| Alpha-1 microglobulin                    | <i>Pleuronectes platessa</i> | Ppla.A1mg  | X63762   | VI    |
| Complement C8 $\gamma$ subunit           | <i>Homo sapiens</i>          | Hsap.C8GC  | X06465   | VII   |
| Complement C8 $\gamma$ subunit           | <i>Oryctolagus cuniculus</i> | Ocun.C8GC  | L26979   | VII   |
| Major urinary protein                    | <i>Mus musculus</i>          | Mmus.mMUP  | X03525   | VIII  |
| Major urinary protein 5                  | <i>Mus musculus</i>          | Mmus.MUP5  | M16360   | VIII  |
| Major urinary protein 4                  | <i>Mus musculus</i>          | Mmus.MUP4  | M16358   | VIII  |
| Major urinary protein                    | <i>Mus musculus</i>          | Mmus.MUP   | M28649   | VIII  |
| Submaxillary alpha-2u-globulin           | <i>Rattus norvegicus</i>     | Rnor.a2g3  | J00738   | IX    |
| Alpha-2u-globulin (L type)               | <i>Rattus norvegicus</i>     | Rnor.a2g1  | M26836   | IX    |
| Odorant-binding protein                  | <i>Bos taurus</i>            | Btau.OBP   | P07435   | X     |
| Allergen BDA20                           | <i>Bos taurus</i>            | Btau.alle  | L42867   | X     |
| Odorant-binding protein 1                | <i>Rattus norvegicus</i>     | Rnor.OBP1  | J03093   | X     |
| Pheromone carrier Aphrodisin             | <i>Cricetus cricetus</i>     | Ccri.Aphr  | X65238   | X     |
| Prostate protein Probasin                | <i>Mus musculus</i>          | Mmus.Pbas  | AF005204 | X     |
| Prostate protein Probasin                | <i>Rattus norvegicus</i>     | Rnor.Pbas  | M27156   | X     |
| Lactation protein Trichosurin            | <i>Trichosurus vulpecula</i> | Tvul.Lip   | U40376   | XI    |
| Allergen f2                              | <i>Canis familiaris</i>      | Cfam.f2p   | AF027178 | XI    |
| Zeaxanthin epoxidase                     | <i>Oryza sativa</i>          | Os ZEP     | BAB39765 | XII   |
| Zeaxanthin epoxidase                     | <i>Arabidopsis thaliana</i>  | At ZEP     | BAB08942 | XII   |
| Alpha-1 acid glycoprotein                | <i>Mus musculus</i>          | Mmus.a1GP  | M27009   | XII   |
| Alpha-1 acid glycoprotein                | <i>Rattus norvegicus</i>     | Rnor.a1GP  | J00696   | XII   |
| Alpha-1 acid glycoprotein                | <i>Oryctolagus cuniculus</i> | Ocun.a1GP  | X58727   | XII   |
| Alpha-1 acid glycoprotein                | <i>Homo sapiens</i>          | Hsap.a1GP  | M13692   | XII   |
| Violaxanthin de-epoxidase                | <i>Triticum aestivum</i>     | Ta VDE     | AAK38177 | XII   |
| Violaxanthin de-epoxidase                | <i>Arabidopsis thaliana</i>  | At VDE     | AAL34241 | XII   |
| Late lactation protein                   | <i>Trichosurus vulpecula</i> | Tvul.LLP   | U34287   | XIII  |
| Vomer nasal secretory protein 1          | <i>Mus musculus</i>          | Mmus.VNSP1 | D38580   | XIII  |
| Epididymal secretory protein             | <i>Mus musculus</i>          | Mmus.Lcn13 | AAR11375 | XIII  |
| Vomer nasal secretory protein 2          | <i>Mus musculus</i>          | Mmus.VNSP2 | D38581   | XIII  |
| von Ebner's gland protein                | <i>Sus scrofa</i>            | Sscr.VEG   | S77587   | XIII  |
| Allergen f1                              | <i>Canis familiaris</i>      | Cfam.f1p   | AF027177 | XIII  |
| von Ebner's gland protein                | <i>Homo sapiens</i>          | Hsap.VEG   | S77587   | XIII  |
| von Ebner's gland protein 2              | <i>Rattus norvegicus</i>     | Rnor.VEG2  | X74806   | XIII  |
| Epididymal secretory protein             | <i>Homo sapiens</i>          | Hsap.Lcn5  | AAQ81974 | XIV/M |
| Epididymal retinoic acid binding protein | <i>Mus musculus</i>          | Mmus.ERBP  | AAD09351 | XIV   |
| Epididymal secretory protein             | <i>Mus musculus</i>          | Mmus.Lcn8  | AF082221 | XIV   |

\* Accession numbers are not yet available for proteins reconstructed in this study.

Supplemental Table III. FASTA files of lipocalins and lipocalin-like sequences used in the alignment presented in suppl. fig. 7.

>Mmus.a1GP

QNPEHVNIITIGDPITNETLSWLSKWFFFIGAAVLNPDYRQEIQKTQMVFVFNLT PNLINDTMELREYHTIDD  
HCVYNSTHLGIQRENGTLSKYVGGVKIFADLIVLKMHGAFMLAFDLKDEKRRGLSLNAKRPDITPELREVF  
QKAVTHVGMDESEIIFVDWKKDRCSQQEKQQLELEKETKKDPEEGQA

>Rnor.a1GP

IQNPEPANTLGIPIITNETLKWLSKWFYMGAAFRDPVFKQAVQTIQTEYFYLT PNLINDTIELREFQTTDD  
QCVYNFTHLGVQRENGTLSKCGAVKIFAHLIVLKKHGT FMLAFNLTDENRGLSFYAKKPDLSPELRKIFQ  
QAVKDVGMDESEIVFVDWTKDKCSEQQKQQLELEKETKKETKKDP

>Hsap.a1GP

QIPLCANLVPVPIITNATLDQITGKWFYIASAFRNEEYKNSVQEIQATFFYFTPNKTEDTIFLREYQTRQDQ  
CIYNTTYLNVQRENGTISRIVGGQEHFAHLLILRDTKYMLAFDVNDEKNWGLSVYADKPETTKEQLGEFY  
EALDCLRIPKSDVVYTDWKKDKCEPLEKQHEKERKQEEGES

>Ocun.a1GP

QDPACANFSTSPITNATLDQLSHKWFFITASAFRNPKYKQLVQHTQAAFFYFTAIKEEDTLLLREYITTNNT  
CFYNSSIVRVQRENGTLSKHDGIRNSVADLLLLLRDPGSFLLVFFAGKEQDKGMSFYTDKPKASPEQLEEFY  
EALTCLGMNKTEVVYTDWTKDLCEPLEKQHEEERKKEKAES

>Hsap.RBP

ERDCRVSSFVKENFDKARFSGTWYAMAKKDPEGLFLQDNIVA EFSVDETGQMSATAKGRVRLNNWDVCA  
DMVGTFTDTEDEPAKFKMKYWGVA SFLQKGNDDHWIVD TDYDTYAVQYSCRLNLDGTCADSY SFVFSRDPN  
GLPPEAQKIVRQRQEELCLARQYRLIVHNGYCDGRSERNLL

>Ggal.RBP

ERDCRVSSFVKENFDKNRYS GTWYAMAKKDPEGLFLQDNVVAQFTVDENGQMSATAKGRVRLFNNWDVCA  
DMIGSFTDTEDEPAKFKMKYWGVA SFLQKGNDDHWVVD TDYDTYALHYS CRELNEDGTCADSY SFVFSRDPK  
GLPPEAQKIVRQRQIDLCCLDRKYRVIVHNGFC S

>Xlae.RBP

EKNCRVDNFEVMKDFNKERYAGVWYAVAKKDPEGLFLLDNIAANFKIEDNGKTTATAKGRVRILDKLELCA  
NMVGTFIETNDPAKFKMKYHGALAILERGLDDHWVVD TDYDTYAITYACRRRNLDGTCRDSYSFVFSRDIN  
GLPSESQRIVRRRQEQLCLDRKYRVVHNGYCE TN

>Omyc.RBP1

SDCQVSNIQVMQNFDRSRYTGRWYAVAKKDPVGLFLLDNVVAQFSVDESGKVTATAHGRV IILNNWEMCAN  
MFGTFEDTDPKAKFKMYWGAASYLQTGNDDHWVID TDYDNYAIHYS CREVDLDGTCLDGYSFIFSRHPTG  
LRPEDQKIVTDKKKEICFLGKYRRVGHGTGFCE SS

>Ggal.Purp

QTCVDSFSVKDNFDPKRYAGKWYALAKKDPEGLFLQDNISAEYTV EEDGTM TASSKGRVKLFGFWVICAD  
MAAQYTVDPPTPAKMYMTYQGLASYLSSGGDNYWVID TDYDNYAITYACRSLKEDGSCDDGYSLIFSRNP  
RGLPPAIQRIVRQKQEEICMSGQFQPVLQSGAC

>Tatil-1

MAAKKSGSEMGGVVLGLDVARYMGRWYEIASFPNFFQPRDGRDTRATYELMEDGATVHVLNETWSKGKRDFI  
EGTAYKADPASEEAKLKVIFYVPPFLPIIPVVG DYWVLYVDDDYQYALVGEPRRKS LWILCRKTHIEEEVY  
NQLLEKAKEEGYDVAKLHKTPQSDPPESDAAPTDSKGTWWFKSLFGK

>Attil

MTEKKEME VVKGLNVERYMGRWYEIASFSPRFQPKNGVDTRATYTLNPDGTIHLVNETWSNGKRGFIEGSA  
YKADPKSDEAKLKVIFYVPPFLPIIPVTGDYWVLYIDPDYQH ALIGQPSRSYLWILSRTAQME EETYKQLV

EKAVEEGYDISKHLKTPQSDTPPESNTAPEDSKGVVWFKSLFGK

>Tat1-2

MAAMKVVRNLDLERYMGRWYEIACFPSRFQPKDGANTRATYTLGPDGAVKVLNETWTDGRRGHIEGTAFRA  
DPAGDEAKLKVRFYVPPFLPVFPVTGDYWVLHVDDAYQFALVGQPSRNYLWILCRQPQMDSEGVEELVER  
AKEEGYDVS KLKTPHPEPTPESQDAPKDGGLWWIKSLFGK

>AtZEP

CITGDRINGLVDGISGTWYVVFDTFTPAASRGLPVTRVISRMTLQQILARAVGEDVIRNESNVVDFEDSGD  
KVTVVLENGQRYEGDLLVGADGIWSKVRNNLFRSEATYSGYTCYTGIADFIPADIESVGYRVFLGHKQYF  
VSSDVGGGKMQWYAFHEEPAGGADAPNGMKKRLEIFDGCNDVLDLLHATEEEAILRRDIYDRPGFTWGWK  
GRVTLGDSIHAMQPNMGQGGCMAIEDSFQLALELDEAWKQSVETTTTPVDVSSSLKRYEESRRLRVAI IHA  
MARMAAIMASTYKAYLGVGLGPLSFLTFRVPHGRVGGRRFFVDIAMPMLDWVLGGNSEKLQGRPPSCRL  
TDKADDRLEWFEDDDALERTIKGEWYLI PHGDCCVSETLCLTKDEDQPCIVGSEPQDFPGMRIVIPSS  
QVSKMHARVIYKDGAFFLMDLRSEHGTYVTDNEGRRYRATPNFPARFRSSDIIEFGSDKKAARVVKVIRKT  
PKSTRKNESNNDKLLQTA

>OsZEP

CVTGDRINGLVDGISGSWYIKFDTFTPAERGLPVTRVISRMTLQQILARAVGDDAILNDSHVVDIFDDGN  
KVTAILLEDGRKFEGLLVGADGIWSKVRKVLFGQSEATYSEYTCYTGIADFVPPDIDTVGYRVFLGHKQYF  
VSSDVGAGKMQWYAFHKEPAGGTDPENGKNRLLLEIFNGWCNDVLDLINATDEEAILRRDIYDRPPTFNWG  
KGRVTLGDSVHAMQPNLGQGGCMAIEDGYQLAVELEKSWQESAKSGTPMDIVSSLRRYEKERILRVSVIH  
GLARMAAIMATTYRYPYLVGLGPLSFLTCLRIPHPGRVGGRRFFIKYGMPLMLSWVLGGNSTKLEGRPLSCR  
LSDKANDQLRRWFEDDDALEQAMGGEWYLLPTSSGDSQPIRLIRDEKKSLSIGSRSDPSNSTASLALPLPQ  
ISENHATITCKNKAFYVTDNGSEHGTWITDNEGRRYRRTSELPCPFPSLGCH

>TaVDE

PDPSALVKNFNMAADRFRGWYISSGLNPTFDTFDCQLHEFRLEGDRLVANLAWRIPTPDTGFFTRGAVQRFV  
QDSSQPAIILYNDNEYLHYQDDWYILSSKIENKDDDYIFVYYRGRNDAWDGYGGAVVYTRSKELPETIVPE  
LERATKSVGRDFSTFIRTDNTCGAEPPLADRIERTVEKGEKLIIVDEVKEIEGEIEGEVKELEEREETLVKR  
LADGIMEVKQDVMNFFQGLSKEEMEILDQLNLEATEVEELFSRSLPIRKL

>AtVDE

PDPSVLVQNFNISDFNGKWIITSGLNPTFDADFDCQLHEFHTEGDNKLVGNISWRIKTLDSGFFTRSAVQKF  
VQDPNQPGVLYNDNEYLHYQDDWYILSSKIENKPEDYIFVYYRGRNDAWDGYGGAVVYTRSSVLPNSIIP  
ELEKAAKSI GRDFSTFIRTDNTCGPEPALVERIEKTVEEGERIIVKEVEEIEEEVEKEVEKVGRTMTLQ  
RLAEGFNLKQDEENFVRELSKEEMEFLDEIKMEASEVEKLFKALPIRQVR

>TaCHL

MMTKGMTAKNFDPVRYSGRWFEVASRKGGFAGQGQEDCHCTQGVYTFDEKAGAIKVETFCVHGSPDGYITG  
IRGKVQCLSQEDMAGAETDLEREEMISSKCFLRFPTLPFIPKLPYDVLATDYDNYAVVSGAKDTSFIQIYS  
RTPNPGPEFIEKYKSYAAGFGYDLSKIKDTPQDCEVSSDQLAEMMSMPGMDQALTNQFPDLKLSVAFDP  
FTSVTQTLKLAEVYFK

>AtCHL

MMMMRGMTAKNFDPVRYSGRWFEVASLKRGFAGQGQEDCHCTQGVYTFDMKESAIRVDTFCVHGSPDGYIT  
GIRGKVCVGAEDLEKSETDLEKQEMIKEKCFLRFPTLPFIPKLPYDVIAATDYDNYALVSGAKDKGFVQVY  
SRTNPGPEFIAKYKNYLAQFGYDPEKIKDTPQDCEVTDLAELAMMSMPGMEQTLTNQFPDLGLRKSQVFD  
PFTSVFETLKKLVPLYFK

>Mmus . ApoD

QNFHLGKCPSPVQENFDVKKYLGRWYEIEKIPASFEKGNCIQANYSLMENGNIIEVLNKEKSPDGTMNQVK  
GEAKQSNVSEPAKLEVQFFPLMPAPYWILATDYENYALVYSCTTFFWLFHVDFFWILGRNPYLPETITY  
LKDILTSNGIDIEKMTTDDQANCPDFL

>Hsap . ApoD

QAFHLGKCPNPPVQENFDVNKYLGRWYEIEKIPTTFENGRCIQANYSLMENGKIKVLNQLRADGTVNQIE

GEATPVNLTEPAKLEVKFSWFMPSAPYWILATDYENYALVYSCTCIIQLFHVDFAWILARNPNLPPETVDS  
LKNILTSNNIDVKKMTVTDQVNCPKLS

>Sscr.VEG

AQEFPAVGQPLQDLLGRWYLKAMTSDPEIPGKKPESVTPILILKALEGGDLEAQITFLIDGQCQDVTLVLKK  
TNQPFTFTAYDGRVYVYILPSKVVDHYIILYCEGELDQEVMAKLVGRDPENNPEALEEFKEVARAKGLNP  
DIVRPQQSETCSPGGN

>Cfam.flp

QDTPALGKDTVAVSGKWYLKAMTADQEVPEKPDVTPMILKAQKGGNLEAKITMLTNGQCQONITVVLHKTS  
EPGKYTAYEGQRVVFIIQPSVVRDHYIILYCEGELHGRQIRMAKLLGRDPEQSQALEDFFREFSRAKGLNQEI  
LELAQSETCSPGGQ

>Rnor.VEG2

AQAFPTTEENQDVSGTWYLKAAAWDKIEFTPKKFGSVSVTPMKIKTLEGGNLQVKFTVLI SGRCQEMSTV  
LEKTDEPGKYTAYSGKQVFTVYSIPSAVEDHYIFYEYEGKIHRRHFQIAKLVGRNPEINQEALEDFOAVRA  
GGLNPDNIIFTFIPKQSETCPLGSN

>Hsap.VEG

AHLLASDEEIQDVSGTWYLKAMTVDREFPEMNLESVTPMTLTTLEGGNLEAKVTMLI SGRCQEVKAVLEK  
TDEPGKYTADGGKHVAYIIRSHVKDHYIFYCEGELHGKPVGRVGLVGRDPKNNLEALEDFEKAAGARGLST  
ESILIPRQSETCSPGSD

>Mmus.VNSP1

QDSSFLAFNNGNFSGKWFLKALVSEDDIPINKVSPMLILVLNNGDIELSITHMIYDQCLEVTTILEKTDVP  
GQYLAFEGKTHLQVQLSSVKGHYMLYCDGEIEGMRFLMTQLIGRDPQENLEALEEFKVFTQIKGLVAENLV  
ILEQMEKCEPESFYELPSRSE

>Mmus.VNSP2

LQTYDDLPIFISEEDKLSGVWFIKATVSQRREVEGETLVAFPKFTCPPEEGTLELRHTLASKGECINVGIRL  
QRTEEPGQYSAFWGHTLFYIYDLVVKDHYIICYESHFPQKISQFGYLIGKYPEENQDTELVFKEFIQHKGF  
LQEKIGVPEQRDRCIPIHDSAHDHCK

>Mmus.MUP4

HAEATSQGNLNVKINGEWF SILLASDKREKIEEHGSMRVFVEHIVLENSLAFKFHTVIDGECSEIFL  
VADKTEKAGEYSVYDGFNTFTILKTDYDNYIMFHLINCKDGTQFLMELYGRKADLNSDIKEKFKLCEE  
HGI IKENIIDLTKTNRCLKARE

>Mmus.MUP5

EEASSERQNFNVEKINGKWF SILLASDKREKIEEHGTMRVFVEHIDVLENSLAFKFHTVIDEECTEIYLV  
DKTEKAGEYSVYDGFNTFTILKTDYDNYIMFHLINCKDEENFQFLMELFGREPDLSSDIKEKFAKLCEEH  
IVRENIIDLSNANRCLQARE

>Mmus.MUP

HAEASSTGRNFNVEKINGEWH TII LAFDKREKIEDNGNFRLFLEQIHVLENSLVLFKHTVRDEECSELSM  
VADKTEKAGEYSVYDGFNTFTIPKTDYDNFLMAHLINENDGETFQFLMGLYGREPDLSSDIKERFAQLCEK  
HGILRENIIDLSNANRCLQARE

>Mmus.mMUP

HAESSSMERNFNVEQISGYWFSIAEASYEREKIEEHGSMRAFVENITVLENSLVFKFHLIVNEECTEMTA  
IGEQTAKAGIYYMNYDGFNTFSILKTDYDNYIMIHLINCKDGTQFLMELYGREPDLSDIKEKFAKLCEE  
HGI IRENIIDLTNVNRCLEARE

>Rnor.a2g1

HAEASSTRGNLDVDKLNWDWFSIVVASDKREKIEENASMRVFMQHIDVLENSLGFKFRIKENGECRELYL  
VAYKTPEDGEYFVEYDGGNTFTILKTDYDRYVMFHLINFKNGETFQAMVLYGRTKDLSSDIKEKFAKLCEA  
HGITRDNIIIDLTKTDHCLQARG

>Rnor.a2g3

HAE EASFERGNLDV DKLNGDWFSIVVASDKREKIEENGSMRVFVQHIDVLENSLGFTFRIKENGVCTEFSL  
VADKTAKDGEYFVEYDGENTFTILKTDYDNYVMFHLVNVNNGETFQLMELYGR TKDLSSDIKEKFAKLCVA  
HGITRDNII DLTKTDRCLQARG

>Hsap.Lcn9

QEFDPHTVMQRNYNVARVSGVWYSIFMASDDLNR IKENGDLRVFVRNIEHLKNGSLIFDFEYMVQGE CVAV  
VVVCEKTEKNGEYSIN YEGQNTVAVSETDYRLFITFHLQNFNRNGTETH TLALYETCEKYGLGSQNIIDL TN  
KDPCYSKHYRSPRP PPMRW

>Cfam.f2p

QEGNHEEPQGGLEELSGRWHSVALASNKSDLIKPWGHFRVFIHMSAKDGNLHGDILIPQDGQCEKVS LTA  
FKTATSNKFDLEYWGHNDLYLAEVDPKSYLILYMINQYND DTSLV AHLMVRDL SRQQDFLPAFESVCE DIG  
LHKDQIVVLSDDDR CQGSRD

>Tvul.Lip

LQPECSRSEEDLSDEKERKWEQLSRHWHTVVLASSDRSLIEEGPFRNF IQNITVESGNLNGFFLTRKNGQ  
CIPLYLTAFKTEEARQFKLNYYGTNDVYYGSSKPN EYAKFI FYN YHDGKVN VVANLFGRTPNLSNEIKKRF  
EEDFMNRGFRRENILDI SEVDHC

>Ccri.Aphr

QDFAELQ GKWYTI VIAADNLEKIEEGGPLRFYFRHIDCYKNCSEMEITFYVITNNQCSKTTVIGYLKNGT  
YQTQFEGNNIFQPLYITSDKIFFTNKNMDRAGQETNMIVVAGKGNALTPEENEILVQFAHEKKIPVENILN  
ILATDTCPE

>Rnor.OBP1

HHENLDISPSEVNGDWRTLYIVADNVEKVAEGGSLRAYFQHMECGDECQELKII FNVKLDSECQTH TVVGQ  
KHEDGRYTTDYSGRNYFHV LKKTDDIIFFHNVNVD ESGRRQCDLVAGKREDLNKAQKQELRKLAE EYNI PN  
ENTQHLVPTDTCNQ

>Mmus.Pbas

VMSLKKKIDGPWQTIYLAASTMEKINEGSPLRTYFRHICVGRRSNQVYLYFFIKKGTKCQLYKVI GRKKQE  
VYYAQYEGSIAFMLKMNVEKILLFHYFNKNRRNDVTRVAGVLAKGKLNKEEMTEFMNLVEEMGIEEENVQR  
IMDTDNCPSKIRISITD

>Rnor.Pbas

MMTDKNLKKKIEGNWRTVYLAASSVEKINEGSPLRTYFRRIECGKRCNRINLYFYIKKGAKCQQFKIVGRR  
SQDVY YAKYEGSTAFMLKTVNEKILLFDYFNRRNDVTRVAGVLAKGRQLTKDEMTEYMN FVEEMGIEDE  
NVQRVMDTDTCPNKIRIR

>Btau.alle

AQETPAEIDPSKIPGEWRIIYAAADNKDKIVEGGPLRNYRRIECINDCESLSITFY LKDGQGTCLLLTEVA  
KRQEGYVYVLEFYGTNTLEVIHVSENMLV TYVENYDGERITKMTEGLAKGTSFTPEELEKYQLNSERGV P  
NENIENLIKTDNCP

>Btau.BLB

LIVTQTMKGLDIQKVAGTWYSLAMAASDILSLDAQSAPLRVYVEELKPTPEGDLEILLQKWENGECAQKKI  
IAEKTKIPAVFKIDALNENKVLVLDTDYK KYLLFCMENS AEPESLACQCLVRTPEVDDEALEKFDKALKA  
LPMHIRLSFNPTQLEEQCHI

>Sscr.BLB

VEVTPIMTELDTQKVAGTWHTVAMAVSDVSLLDKSSPLKAYVEGLKPTPEGDLEILLQKRENDKCAQEV L  
LAKKTDIPAVFKINALDENQLFLLD TDYD SHLLLCMENSASPEHSLVCQSLARTLEVDDQIREKFEDALKT  
LSVPMRILPAQLEEQCRV

>Hsap.PP14

VPAMDIPQTKQDLELPKLAGTWHSMAMATNNISLMATLKAPLRVHITSLLPTPEDNLEIVLHRWENNSCVE  
KKVLGEKTGNPKKFKINYTVANEATLLDLDYDNFLFLCLQDTTTTPIQSMQCQYLARVLVEDDEIMQGFIRA  
FRPLPRHLWYLLDLKQMEEPCRF

>Mmus.1mg

DPASTLPDIQVQENFSESRYYGKWNLA VGSTCPWLSRIKDKMSVQTLVLQEGATETEISMTSTRWRRGVC  
EEITGAYQKTDIDGKFLYHKS KWNITLESYVVHTNYDEYAI FLTKKSSHHHGLTITAKLYGREPQLRDSLL  
QEFKDVALNVGISENSIIFMPDRGECVPGDREVEPTS IAR

>Hsap.1mg

PVPTPPDNIQVQENFNISRIY GKWYNLAIGSTCPWLKKIMDRMTVSTLVLGEGATEAEISMTSTRWRK GVC  
EETSGAYEKTDIDGKFLYHKS KWNITMESYVVHTNYDEYAI FLTKKFSRHHGPTITAKLYGRAPQLRETL L  
QDFRVVAQGVGIPEDSIFTMADRGE CVPGEQEPEPILIPRV

>Xlae.1mg

SPIQPEDNIQIQENFDLQRIY GKWYDIAIGSTCKWLKHHKEKFNMG TLELSDGETDGEVRIVNTRMRHGTC  
SQIVGSYQKTETPGKFDYFNARWGTTIQNYIVFTNYNEYVIMQMRKKKGSETTTTTVKLYGRSPDLRPTLVD  
EFRQFALAQQGIPEDSIVMLPNNGECSPGEIE

>Ssal.1mg

VPVLPEPLFPPIQDNFDLTKFMGKWH DIAIGSTCPWMQRHKGDAAI GTLELQASGTEDKVSMT RSMKKHGKC  
EQISGDYELTATPGRLTYHIAK WGADVDAVVDVHTNYDEYAI VMLSKQKTGGEKTKSAKLYSRTMELPPTIL  
EDFRRLVREQGMADDTII IKQNKGECVPGTEPVAAEPQPEITAP

>Ppla.1mg

LPVLPEPLYPTQENFDLTRFVGTWHDVA LTSSCPHMQRNRADAAI GKLVLKEDTGNKLVTRTRLRHGTCV  
EMSGEYELTSTPGRIFYHIDRW DADVDAVVDVHTNYDEYAI IMSKQKTS GENSTSLKLYSRTMSVRD TVLD  
DFKTLVRHQGMSDDTII IKQNKGDCIPGEQVEEAPSQPEPK

>Hsap.C8GC

QKPQRPRRPASPISTIQPKANFDAQQFAGTWLLVAVGSACRFLQE QGHRAEATTLHVAPQGTAMAVSTFRK  
LDGICWQVRQLYGD TGVLGRFLLQARGARGAVHVVAETDYQSFAVLYLERAGQLSVKLYARSLPVSDSVL  
SGFEQRVQEAHLTEDQIFYPKYGFCEAADQFHVLDVRR

>Ocun.C8GC

RWAQKPRGAPSAISAIQPKANFDAQQFAGTWLLAAVGSACHFLQE QGHRAEATALHVAPQGAAMAVSTFRK  
LDGICWQVSQRYGATGVPGRFLLPARGPRGAVHVVAETDYHSFAVLYLERARQLSVKLYVRSLPVSDSVL  
GAFEQRVAQANLTQDQVLFPTYGFCEAADQFHILVRR

>Xlae.cp11

SLWVGAEVQVQPDFQKEKVLGK WYIGGLASNSNWFKDRKSHMKCTTII TPTADGNLEVTATYPKM DRCET  
KSMTYFKTEQLGGFRAKSPRYGSEHDMRVVETNYDEYILMYTVKTKGSETNQIVSLFGRDKDLRPELLDKF  
QNFAKSQGLADDNIIILPHTDQCMTEA

>Bmar.lip

DVPIQPDFQEDKILGK WYIGGLASNSNWFQSKKQQLKCTTVITPTADGNLDVVATFPKLD RCEKKSMTYI  
KTEQPGRFLSKSPRYGSDH VIRVVE SNYDEYTLMHTIKTKGNEVNTIVSLFGRRKTLSP ELLDKFQQFAKE  
QGLTDDNIIILPQTDSCMSEV

>Mmus.PGDS

QTPAQGHDTVQPNFQQDKFLGRWYSAGLASNSSWFREKKA VLYMCKTVVAPSTEGGLNLTSTFLRKNQCET  
KIMVLQAPAGAPHYTYSSPHSGS IHSVSVVEANYDEYALLFSRGTGKPGQDFR MATLYSRTQTLKDELKEK  
FTTFSKAQGLTEEDIVFLPQDPKCIQE

>Hsap.PGDS

QAAPEAQVSVQPNFQQDKFLGRWFSAGLASNSSWLREKKAALSMCKSVVAPATDGGLNLTSTFLRKNQCET  
RTMLLQAPAGSLGSYSYRSPHWGSTYSVSVVETDYDQYALLYSQGSKGPGE DFRMATLYSRTQTPRAELKEK



FTAFCKAQGFTEDTIVFLPQTDKCMTEQ

>Mmus.NGAL

QDSTQNLI PAPSLLTVPLQPDFRSDQFRGRWYVVGLAGNAVQKKTEGSFTMYSTIYELQENNSYNVTSILV  
RDQDQGCYRWFRTFVPSRAGQFTLGNMHRYPQVQSYNVQVATTDYNQFAMVFFRKTSENKQYFKITLYGR  
TKELSPELKERFTRFAKSLGLKDDNII FSVPTDQCIDN

>Hsap.NGAL

QDSTSDLI PAPPKSKVPLQQNFQDNQFQGWYVVGLAGNAVILREDKDPQKMYATIYELKEDKSYNVTSVLF  
RKKKCDYRWFRTFVPGCQPGFETLGNIKSYPLTSYLVRVSTNYNQHAMVFFKKVSNREYFKITLYGRK  
ELTSELKENFIRFSKSLGLPENHIVFPVIDQCIDG

>Hsap.Lcn12

KVLQAQTPTPLPLPPMQSFQGNQFQGEWVFLGLAGNSFRPEHRALLNAFTATFELSDDGRFEVWNAMTRG  
QHCDTWSYVLI PAAQPGQFTVDHGVEPGADREETRVDSDYTQFALMLSRRHTRSLAVLRI SLLGRSWLLP  
PGTLDQFICLGRAQGLSDDNIVFPDVTGNMVHLQACWAVGTGPAGMSLVDPRGAGPSVYPGSSAPACAQGS  
PGSWVPVLNPGSEPPPAAPGPLSWATSSHPGSPVPGHLLPPQVPCPGPPPPAPPAPGPLSRPTSSHPGSPV  
LGYLLPPQVPCPGSPSPSGSPVLGHLLPSPI PAHKELGLIPGGALDLSLPPWVAAPA

>Mmus.Lcn12

QILESQI SAMSQGFQMTSFQSDQFQGEWVFLGLADNTFRREHRALLNFFTTLFELKEKSQFQVTNSMTRG  
KHCNTWSYTLI PATKPGQFTRDNRGSGPGADRENIQVIETDYITFALVLSLRQTSSQNITRVSLGRNWRL  
SHKTIDKFICLTRTQNLTKDNFLFPDLSDWLPDPQVC

>DhLip

KKEEMPVVEKIELDKYLGKWEIARKPFLFQKKCYSNVSAKYSLNDNANINVDNSCYSKDGKLRQAIGAEAF  
TQNPPFNKLVKVSFLPKAIRFLPIGRGDYWILKIDDNQYQTVLVGGPSRKYMWILSRSQNHDEIVVQDYLDY  
AKEIGFDVSDIIMTKQTNE

>Cfre.OML

CSSPTPPKGVTVVNNFDAKRYLGTWYEIARFDHRFERGLDKVTATYSLRDDGGINVINKGYNPDRMWQKT  
EGKAYFTGDPSTAALKVSFFGPFYGGYNVIALDREYRHALVCGPDRDYLWILSRTPTISDEMKGQMLAIAT  
REGFEVKNLIWVKQPGA

>Ecol.OML

CSSPTPPRGVTVVNNFDAKRYLGTWYEIARFDHRFERGLEKVTATYSLRDDGGLNVINKGYNPDRGMWQOS  
EGKAYFTGAPTRAALKVSFFGPFYGGYNVIALDREYRHALVCGPDRDYLWILSRTPTISDEVKQEMLAVAT  
REGFDVSKFIWVQPGS

>Vcho.Lpro

MEILIGATCLGMPESVKPVSDFELNNYLGKWEIARLDHDSFERGLSQVTAEYRVRNDGGISVLNRYSEEK  
GEWKEAEGKAYFVNGSTDGYLKVVSFFGPFYGSYVVFELDRENYSYAFVSGPNTEYLLWLLSRTPTVERGILD  
KFIEMSKERGFDTNRLIYVQLQ

>Ddis.Lip

ILGGVTYAYNSFKRYIPEGVHAVKPFYPEKYVGKWEIARLYTYFEKDLDKITAEYSINKDGSITVVNSGY  
NYKKKKRENAKGIAYFVNGSDEGMLKVVSFFGPFYSGYNVIAIDPDYKYALIAGQSFYDMWILSKEPTIPEK  
IKNSYLELAKSVGYDITKLIWSKQENEN

>Dmel.Lip

AVVWAHAQVPPFGKCPDVKLLDTFDAEAYMGVWYEAAYPFAFEIGKKCIYANYSLIDNSTVSVVNAAINR  
FTGQPSNVTGQAKVLGPGQLAVAFYPTQPLTKANYLVLTGDYESYAVVYSCTSVTPLANFKIVWILTRQRE  
PSAEAVDAARKILEDNVSAFLIDTVQKNCPRLDGNGTGLAGEDGLDVDDFVSTTPVNAIEKA

>Gmel.Gall

VHEGKCPDFKPVDFNLTAYQGVWYEISKTPNDAEKNGKCGQAEYKLEGEVVKVKNSHVVDGVQKYVEGTA  
KFAEDANKSALLVTLTYGAVNRESPLNVIATDYQNYAIAYTCKYDEKSKSHNDSIWILSRACKLEGDAKT

AVDNYLKEHAKEIDASKLVQTDSEACKFTSTSAVTEPQTKKQ

>Pbra.Bbp

NVYHDGACPEVKPVDNFDWSNYHGKWWEVAKYPNSVEKYGKCGWAEYTPPEGKSVKVSNYHVIHGKEYFIEG  
TAYPVGDSKIGKIYHKLTYGGVTKENVFNVLSTDNKNI IIGYYCKYDEDKKGHQDFVWVLSRSKVLGTGEAK  
TAVENYLIGSPVVDSQKLVYSDFSEAACKVNN

>Msex.IcyA

GDI FYPGYCPEVKPVDDFDLSAFAGAWHEIAKLPLENENEGKCTVAEYKYDGKKASVYNSFVINGVKEYME  
GDLEIAPDAKLTQKQKYVMTFKFGPRVVVQVPWVLATDYKNYA INYNCNYHPDKKAHSIHAWVLSRNKVL  
GNTKEVVDNVLKTFSHLIDASKFMSNEFSEAACQYSTTYSLTGPDRH

>Hgam.CRC2

DGIPSFVTAGKCASVANQDNFDLRRYAGRWYQTHI IENAYQPVTRCIHSNYEYSTNDYGFVTTAGFNPND  
EYLKIDFKVYPTKEFPAAHMLIDAPSVFAAPYEVIE TDYETYSVYSCITTDNYKSEFAFVFSRTPQTS GP  
AVEKTA AVFNKNGVEFSKFVPSHTAECVYRA

>Hgam.CRC1

DKIPDFVVPGKCASVDRNKLWAEQTPNRNSYAGVWYQFALTNNPYQLIEKCVRNEYSFDGKQFVIKSTGIA  
YDGNLLKRNGKLYPNPFGEPHLSIDYENSFAAPLVILETDYSNYACLYSCIDYNFGYHSDFSFIFSRSANL  
ADQYVKKCEAAFKNINVDTTFRVKTQVQSSCPYDTQKTL

>Mmus.Lcn13

AQEAPPDDLVDYSGIWIYAKAMVHNGTLP SHKIPSI VFPVRI IALEEGDLETTVVFWNNGHCREFKFVMKKT  
E EPGKYTAFHNTKVIHVEKTSVNEHYIF YCEGRHNGTSSFGMGKLMGRDSGENPEAMEEFKNFIKRMNLR  
ENMFVPEIGDKCVESD

>Tvul.BL

IQAIENIHSKEELVVEKLI GPWYRV EEA KAMEFSI PLFDMNIKEVNRTPEGNLELIVLEQTDSCVEKKFLL  
KKTEKPAEFEIYIPSESASYTL SVMETDYDNYILGCLENVNYREKMACAHYERRIEENKGMEEFKKIVRTL  
TIPYTMIEAQ TREMCRV

>Mmus.Lcn11

LQDFHPEQVTGPWHTLKLASTDRSLIEEGGAYRCFMTDIVLLDNGNLNVTYFHRKDGKCVKEFYIAEKD TD  
PGQYTFEYQGRNSLTFVHVTE DFAIMDLENQSEGGTTIVIEFHGRSLSTDELG

>GvB1c

DSQPIETVAEVDNFNRYDGRWYELARTPNIFQIGCTCVTANYSVLSESSISVFNTCNFRFRPRGNLVTIDGVA  
VVADPNAPGKLLITFEGSPVAEDYWIIDLVEDPNNSAGDYAFAAIGGPNRDFIFII SRKPALETYQDV LAY  
QGIVKRLQAQHFVVDALNSTPQPTSCTYKQSLSLPGGL

>Btau.OBP

KNAQEEEEAEQNLSEL SGPWRTVYIGSTNPEKIQENGPFRTYFREL VFDDEKGTVDYFYSVKRDGKWKNVHV  
KATKQDDGT YVADYEGQNVFKIVSLSRTHLVAHNINVDKHGQTTTEL TGLFVKLNVEDEDLEKFWKLTEDKG  
IDKKNVVNFLENEDHPHPE

>MgLip

DTSSVPNTVPSLWDGECFYPTPDIGFDTKSYLGRWYQVAGTVAPFTASCKCIYAQYALNDNGTIQVNN TCE  
AGGRAVNILGTAEPADPGYGAKGALRVQFPGQPGPACSGPNYVVQDYTGDFALVQTYNFSTLFLVLSRNQHP  
EEAVLDAWIKRAGALGSDLSDVIKNDQTNCSFT

>Same.Laz

AQETMGCADRSAINDFNATLYMGKWEYAKMGSMPIYEEGGVCVTAEYSMSSNNITVVNSMKDNTTHEVNTT  
TGWAEFASLHTDGKLSVHFPNSPSVGNWILSTDYDNYSIWVSCVCRPDSAASTEISWILLRSRNSNMT  
LERVEDELKNLQLDLNKYTKTEQSAKYCA

>Tvul.LLP

DDVAFSAFTPSEGTYVQVIAVDKEFPPEEEI PRDMSPLTIMYLDDGKMEARFTMKKDDNCEEINIMLEKTA  
DPRKITMNRRLRYTCAAVRTSKQKHVILVCPREFQGETIRMAKLVGPNTDKNPKALEDFYRFIYRERFDKR  
RIITPKQTEACAPEHA

>Ecab.p19p

RRPHALHMGPGDPNFDEKLVKGGKWFVALASNEPKFIAKDTDMKFFIHKIQVTPESLQFHFHRKVRGMCVP  
TMMTAHKTKKKFQYTVNHSGHKTIFLEKVDPKHFVIFCAHSMKHGKETVVVTLFSRTPVSPDVMWMMFKKY  
CKTHGIHTSNIVDLTQTDRCLHARH

>Ggal.QS-21

AATVPDSSEVAGKWIIVALASNTDSFLREKGMKMMVMARISFLGEDELEVSYAAPS PKGCRKWETTFKKT  
DDGELYSEEAEKTVEVLDTDYKSYAVIFATRVDGRTLHMMRLYSRSREVSPTAMAI FRKLARERNYTDE  
MVAVLPSQECSVDEV

>Hsap.Lcn5

QAVWLGRLDPEQLLGPWYVLAVASREKGFAMEKDMKNVGVVVVTLTPENNLRTLSSQHGLGGCDQSVMDLI  
KRNSGWFENPSIGVLELWVLTNFRDYAIIIFTQLEFGDEPFNTVELYSLTETASQEAMGLFTKWSRSLGF  
LSQ

>Mmus.Lcn8

ESTRVELVPEKIAGFWKEVAVASDQKLVLKAQRRVEGLFLTFSGGNVTVKAVYNSSGSCVTESSLGSRDT  
VGEFAFPGNREIHVLDTDYERYTILKLTLLWQGRNFHVLKYFTRSLENEDEPGFWLFREMTADQGLYMLAR  
HGRCAELLKEGLV

>Mmus.ERBP

TEAAVVKDFDVNKFGLFWYIEIALASKMGAYGLAHKEEKMGAMVVELKENLLALTTTYNEGHCVLEKVAAT  
QVDGSAKYKVTRISGEKEVVVVATDYMTYTVIDITSLVAGAVHRAMKLYSRSLDNNGEALNNFQKIALKHG  
FSETDIHILKHDLTVCVNALQSGQI

>Lviv.ESP

DIPVVPNFDAQKTGVGKWHPIGMAKLPVPEYEQKISPMDHVELTDGDMKLTANYMDGVCKEATAMLKHT  
DKPGVFKFTGGEIRMMDIDYEKYLIMYMKKSTFEAMYLSARGSDVGDDIKEKFKKLVLEQNFPEAHIKYFN  
AEQCTPTAA

>PyLip

RKCPNPATVPALDVAAYTGRWYQIGVTAEFAERQEDNKPCVTADYRLTGPTVEVINCKQDV PANRSSGAIV  
GCAQAVAFPGKKEDPGKLGVPFPAPYVWINLAGSKEDGYRVAVVYSCTSTGSFFSQGLFLLSRTPK  
LRYGVFEAVYWYVRVLARGIRFQKGNFKLTPQGKSCTYRGDEGAKVVFQ

## Supplemental Table IV. FASTA files of plant lipocalins and lipocalin-like sequences.

### Temperature-Induced Lipocalins

>TaTIL-1

MAAKKSGSEMGVVLGLDVARYMGRWYEIASFPNFFQPRDGRDTRATYELMEDGATVHVLNETWSKGKRDYIEGTAYKA  
DPASEEAKLKVKFYVPPFLPIIPVVG DYWVLYVDDDYQYALVGEPRRKS L WILCRKTHIEEEVYNQLLEKAKEEGYDV  
AKLHKTPQSDPPPESDAAPTDSKGTWWFKSLFGK

>TaTIL-2

MAAMKVVRLDLERYMGRWYEIACFPSRFQPKDGANTRATYTLGPDGAVKVLNETWTGDGRRGHI EGTA FRADPAGDEA  
KLKVRFYVPPFLPVFPVTDGYWVLHVDDAYQFALVGQPSRNYLWILCRQPQMDEGVYEELVERAKEEGYDVSKLRKTP  
HPEPTPESQDAPKDGGLWWIKSLFGK

>HvTIL-1

MAVKKIGSEMGVVLGLDVARYMGRWYEIASFPNFFQPRDGRDTRATYELMEDGATVHVLNETWSKGKRDYIEGTAYKA  
DPASDEAKLKVKFYVPPFLPIIPVVG DYWVLYVDDDYQYALVGEPRRKS L WILCRKTHIEEEVYNQLLEKAKEEGYDV  
AKLHKTPQSDPPPEGDAAPTDSKGAWWFKSLFGK

>HvTIL-2

MAAMKVVRLDLERYMGRWYEIACFPSRFQPKDGANTRATYTLGPDGAVKVLNETWTGDGRRGHI EGTA FRADDAGDEA  
KLKVRFYVPPFLPVFPVTDGYWVLHVDDAYQYALVGQPSRNYLWILCRQPRMDEGVYNELVERAKEEGYDVSKLRRT  
HPEPTPESQDAPKDGGLWWIRSLFGK

>OsTIL-1

MAAAAVEKKSSEM TVVRGLDVARYMGRWYEIASLPNFFQPRDGRDTRATYALRPD GATVDVLNETWTSSGKRDYIKG  
TAYKADPASDEAKLKVKFYLPFLPVIIPVVG YWVLYVDDDYQYALVGEPRRKDLWILCRQTSMDDEVYGRLLKAKEE  
GYDVEKLRKTPQDDPPPESDAAPTDTKGTWWFKSLFGK

>OsTIL-2

MKVVRNLDLERYMGRWYEIACFPSRFQPRDGTNTRATYTLGPDGAVKVLNETWTGDGRRGHI EGTA YRADPVSDEAKLK  
VKFYVPPFLPIIPVVG DYWVLHVDDAYS YALVGQPSLNYLWILCRQPHMDEEVYQQLVERAKEEGYDVSKLKKTAHPD  
PPPETEQSAGDRGVWWIKSLFGR

>AtTIL

MTEKKEME VVKGLNVERYMGRWYEIASFPNFFQPKNGVDTRATYTLNPDGTI HVLNETWSNGKRGFIEGSAYKADPKS  
DEAKLKVKFYVPPFLPIIPVTGDYWVLYIDPDYQHALIGQPSRSLWILSRQAQMEETYKQLVEKAVEEGYDISKLH  
KTPQSDTPPESNTAPEDSKGVWWFKSLFGK

>LeTIL

MATKVM EVVKNL DLKRYMGRWYEIASFPNFFQPKDGDTRATYTLNSDGTVHVLNETWCNGKRGFIEGTAYKADPNSD  
EAKLKVRFYVPPFLPIIPVTGDYWVLYIDEDYQYALIGQPSRRLWILSRQTRLDD E IYNQLVEKAKEEGYDVSKLHK  
TPQSDSPDSEDS PKDTKGIWWIKSILGK

>LeTIL'

MTTKEME VVKNL DVEKYMGRWYEIASFPNFFQPKDGVNTRATYTLNQDGTVHVLNETWSGGKRGSI EGTA YKADPKSD  
EAKLKVKFYIPFLPIIPVVG DYWVLYIDDDYQYALIGQPSKYLWILCRQPHLDEE IYNQLVEKAKEEGYDVSKLHK  
TPQADPPP DGEDAPKDTKGFWWIKSILGK

>SoTIL

MAAAEGKKS GGQMTVVRGLDVARYMGRWYEIASFPNFFQPRDGRDTRATYRLLEDGATVHVLNETWSKGKRDYIEGTA  
YKADASSDEAKLKVKFYLPFLPIIPVVG DYWVLYVDDDYQYALVGEPRRKNLWILCRKTS IDEEVYNQLVERAKEEG  
YDVSKLHRT PQDDPPPESDAAPTDTKGVWWFKSLFGK

>ZmTIL-1

MAAEEGEKAKSGGGGQOMTVVRGLDVARYMGRWYEIASFPSFFQPRDGRDTRATYRLLEDGATVHVLNETWSKGKRDY  
IEGTAYKADPGSDEAKLKVKFYLPFPLPIVPPVVDYVWLVYVDDDDYQYALVGEPRRKNLWILCRKTSIDEDVYNQLVER  
AKEEGYDVSKLHRTPODDPPPESDAAPTDTKGVVWFKSLFGK

>ZmTIL-2

MAMQVVRNLDLERYAGRWYEIACFPSRFQPKTGTNTRATYTLNPDGTVKVVNETWADGRRGHIEGTAWRADPASDEAK  
LKVRFYVPPFLPLIPVTGDYVWLHIDADYQYALVQGQPSRNYLWILCRQPHMDESVMYKELVERAKEEGYDVSKLRKTAH  
PDPPESEQSPRDGGMWWVKSIFGK

>SbTIL-1

MAAEAGKTTAATKSGGGGQIMTVVRGLDVARYMGRWYEIASFPSFFQPRDGRDTRATYRLLEDGATVHVLNETWSKGK  
RDYIEGTAYKADPNSEAKLKVKFYLPFPLPIVPPVVDYVWLVYVDDDDYQYALVGEPRRKNLWILCRKTSIDEEVYNQL  
VERAKEEGYDVSKLHRTPODDPPPESDAAPTDTKGVVWFKSLFGK

>SbTIL-2

MAAAAMRVVRDLDLERYAGRWYEIACFPSTFQPKTGTNTRATYTLNPDRTVVKVLNETWTDDGGRRGHIEGTAWRADP  
ASDEAKLKVRLYVPPFLPVFPVTGDYVWLHVDADYQYALVQGQPSRKYLWILCRQPMDESVMYNELVERAKEEGYDVSK  
LRKTAHPDPPPESEQSPGDRGVVWIKSIFGK

>GmTIL

MANKEMEVRGLDLQRYMGRWYEIASFPSRNQPKDGENTRATYTLRNDGTVQVLNETWSNGKRGYIQGTAYKVDPKSD  
EAKFKVKFYIPFPLPIIPINGDYVWLFDTDEYQYALIGQPSRNYLWILSRKPHLDDEIYNELVQRAKNVGYDVSKLRK  
TPQSDPPPEEEGPDDTKGIWWLKSIFGK

>GmTIL'

MANNEMQVERGLDLERYMGRWYEIASFPSRNQPKDVNTRATYTLRNDGTVQVLNETWSNGKRGHIEGTAFKSNRTSD  
EAKFKVKFYVPPFLPIIPVTGDYVWLFIDGDYQYALIGQPSRNCLWILSRKPHLDDEIYNKLVQRAKDVGYDVSKLHK  
TPQSDPPPEEEGPQDTKGIWWLKSILGK

>PpTIL

MGGEKDLNVVQNVDLKRYQGRWYEIASIPSRFQPKSTGTNSRATYALKEDQTIHVLNETWVSGKRSYIEGKAWKADAAS  
PDAKLVKRVFLVPPFFPIIPVTGDYVWMLDENYQWALIGQPSRRYLWVLSRTPELSDIYNQLLEHATNEGYDVSKLH  
KTQQIPEIGEEGTSNSENTDRAGVWVWVKSIFGK

>PtTIL

MGKEDLQVVKGLDLQRYMGVWYEIASMPSFFQPKNGINTRATYSLNKDSTVHVLNETFVDGKSSIEGSAYKVDPKSE  
DAKFKVKFMVPPFFPIIPVYGNVWVLLLDDEYQWALIGEPSLKYLVWVLSRQRLDEAIYNRLEHARQEGYDVGRLHK  
TTQNDDPETEAPKDKGFVWIKALLGK

>TrTIL

MGGEKDLNVVQNVDLTRYQGRWYEIASNPTRFQPSRGSNSRATYTLQEDQTVVNLNETWVNNKRSYITGKAWKADPAS  
PDAKLVKRFVPPFLPIIPVTGDYVWMLDADYQWALVGVDPDRSLWVLSRTEQEMSEETYKELVEHAANEGYDVSKLH  
KTEQNPEVGEHEESTDRAGAWVWVKSIFGK

>VvTIL

MAKKEMEVRGIDLQRYMGRWYEIASFPSFFQPKNGINTRATYTLLEADGTTVRVLNETWSDGKRSYIEGTAYKADPKS  
DQAKLVKVKFYVPPFLPIIPVVDYVWVFLFDEEYQYALIGQPSRKYLWILCRQTHMDEEIEYMLVEKAKEVGYDVSKLR  
KTTQTDPPPEGEGPQDTKGIWWIKSIFGK

>MtTIL

MANKEMDVARGVDLQRYMGRWYEIACFPSRFQPSDGKNTRATYTLRDDGTVVNLNETWSSGKRSYIEGTAYKADPNSE  
EAKLVKVKFYVPPMLPIIPVTGDYVWLHLHDYHYALIGQPSRNYLWILCRQPHLDEEIEYNELVQKAKEEGYDVSKLRK  
TPQSDTPPEQEGPEDTKGIWWFKSLFGK

>MtTIL'

MGNTVVGKDKVVKVGLDLERYMGRWYEIASFSPFFQPKNGENTRATYTLNSDGTVHVLNETWNNNGKRTSIEGSAYKADPKSDEAKLKVKFYVPPFLPIIPAVGDYWILYLDDEDYQYALIGGPTNKFLWILSRQPHLDETIYNQLVEKAKEEGYDVSKLHKTPQSDPPPE

>StTIL

MTTKEMEVLNLDVEKYMGRWYEIASFSPRNQPKDGNTRATYTLNQDGTVHVLNETWSSGKRGSIEGTAYKVDPKSEAKLKVKFYVPPFLPIIPVGDYWVLYIDDDYQYALIGQPSKKYLWILCRQPHLDEEINQLVEKAKEVGYDVSKLHKTPQADPPPDGEDAPKDDTKGIWWIKSILGK

>StTIL'

MATKVMELNLDLRYMGRWYEIASFSPRFQPKDGVDRATYTLNSDGTVHVLNETWCNGKRGFIEGTAYKADPNSEAKLKVRFYVPPFLPIIPVTGDYWVLYIDEDYQYALIGQPSRRYLWILSRRTCLDDEIYNQLVEKAKEEGYDVSKLHKTPQSDSPPESEDSPEDTKGIWWIKSILGK

>BnTIL

MTTEKEMEVLNLDLRYMGRWYEIASFSPRFQPKNGADTRATYTLNPDGTVKVLNETWDGKRGFIQGSFAFKTDPKSDEAKFKVRFYVPPFLPIIPVTGDYWVLYIDPEYQHAVIGQPSRYLWILSRRTAHVEEETKQLVEKAVEQGYDVSKLRKTAQSDTPPESDAAPDDTKGIWWIKSIFGK

>PrpTIL

MAKKTMDVVKGLDLQRYMGRWYEIASFSPRFQPKNGENTRATYTLRDDGTVNVLNETWSDGKRSSIEGTAYKADPSSEAKLKVKFYVPPFLPIIPVGDYWVLFIDEDYQYALIGQPSRNYLWILSRQPRLDDEIYNQLVQRAKDEEYDVSKLHKTPQSETPPEEGEGPKDTKGIWWFKSLLGK

>PaTIL

MAKKTMDVVKGLDLQRYMGRWYEIASFSPRFQPKNGENTRATYTLRDDGTVNVLNETWSDGKRSSIEGTAYKADPSSEAKLKVKFYVPPFLPIIPVGDYWVLFIDEDYQYALIGQPSRNYLWILSRQPRLDDEIYNQLVQRAKDEEYDVSKLHKTPQSETPPEEGEGPKDTKGIWWFKSLLGK

>McTIL

MAQKAKEMVVKGLDLGRYMGRWYEIASFSPRFQPRDGENRATYTLRDDGIVDVLNETWVSLGKRYSYIQGTAYKADPNSEAKLKVKFYVPPFLPIIPVTGDYWVLFIDDDYQYALIGQPSRNYLWILCRTPHMDESVYNELVQKAVEEGYDVNKLHKTPQADPPPEGNQAPEDTKGVWWFKSLIGK

>McTIL'

MAHKSKEVVKVGLDLERFMGRWYEIASFSPFFQPRDGENRATYTLNDDGTVHVLNETWVSHGKRDAIEGTAYKADPKSDEAKLKVKFYVPPFLPIIPVTGNYWVLFIDDDYQYALIGEPLRKYLWILCRKTNMDESIYEELVQKAVEEGYDVKKLHKTPQADPPPESSQTPKDKGGWWIKSLFGK

>GaTIL

MSQKTMEVVKGLDIKRYMGRWYEIASFSPRFQPRNGVNRATYTLNEDGTVHVLNETFTDGKRGFIEGTAYKADPQSEAKLKVKFYVPPFLPIIPVGDYWVHLDDDDYQYALIGQPSRNYLWVLCRQTHMDDEIYNQLVQKAKDEGYDVSKLHKTPQSDPPPEGDDTPKDAKGIWWIKSLLGM

>GaTIL'

MEVVKNLDIQRYMGKWEIASFSPFFQPKKGENTSAFYTLKEDGTVHVLNETFVNGKKDSIEGTAYKADPKSDEAKLKVKFYVPPFLPIIPVTGDYWVLYIDEDYQYVVLVGGPTKKYLWILCRQKHMDEEINMLEQKAKDLGYDVSKLHKTPQSDSTPEGEHVPQEKGFWWIKSLFGK

>CsTIL

MASKKEMEVLNLDIKRYMGRWYEIASFSPRNQPKNGADTRATYTLNEDGTVHVRNETWSDGKRGSIEGTAYKADPKSDEAKLKVKFYVPPFFPIIPVVGNYWVLYIDDNYQYALIGEPTRKYLWILCREPHMDEAIYNQLVEKATSEGYDVSKLHKRTPQSDNPPEAEESPQDTKGIWWIKSIFGK

>PbTIL

MATKKEMEVLKGVLDKRYMGRWYEIASFPSRFQPKNGVNTRATYTLNEDGTVHVLNETWNDGKRGYIEGSAYKADPNS  
DEAKLKVKFYVPPFLPIIPVVG DYWVLSLDEDDYQYALIGQASRKYLWILCRKTHMEDDIYNQLVEKAKEEGYDVEKLLH  
KTPQTDPPPEEEGPKDTKGIWWFQSILGK

>PbTIL'

MATKKEMEVLKGVLDKRYMGRWYEIASFPSRFQPKNGVNTRATYTLNEDGTVHVLNETWNDGKRGSIEGSAYKADPNS  
DEAKLKVKFYVPPFLPIIPVVG DYWVLSLDEDDYQYALIGQPSRSLWILCRKTHMEDEIYNQLVEKAKEEGYDVGKLLH  
KTPQTDPPPEEEGPKDTKGIWWIKSILGK

>PotTIL

MATKKEMEVLKGVLDKRYMGRWYEIASFPSRFQPKNGVNTRATYTLNEDGTIHLNETWNDGKRGSIEGSAYKADPNS  
DEAKLKVKFYVPPFLPIIPVVG DYWVLSLDEDDYQYALIGQPSRSLWILCRKTHMEDEIYNQLVEKAKEEGYDVGKLLH  
KTPQTDPPPEEEGPKDTKGIWWIKSILGK

>PotxPotrTIL

MATKKEMEVLKGVLDKRYMGRWYEIASFPSRFQPKNGVNTRATYTLNEDGTVHVLNETWNDGKRGSIEGSAYKADPNS  
DEAKLKVKFYVPPFLPIIPVVG DYWVLSLDEDDYQYALIGQPSRSSLWILCRKTHMEDEIYNQLVEKAKEEGYDVGKLLH  
KTPQTDPPPEEEGPKDTKGIWWIKSILGK

>LsTIL

MSKKAMEVVKGIDLQRYMGRWYEIASFPSRFQPKDGINTRATYTLKDDGTVNVLNETWSGGKRGFIEGTAYKADPKSD  
EAKLKVKFYVPPFLPIIPVTGDYWVLYLDEDDYQYALIGQPSRSLWILCRQTHLDEIYNQLVQKATEEGYDVSKLLK  
TTQTEPPPESEDAPADTKGIWWFKSLFGK

## Chloroplastic Lipocalins

>AtCHL

MILLSSSISLSRPVSSQSFSPPAATSTRRSVTVKCCSSRRLKLNPELKCSLENLFEIQALRKCFVSGFAAIIILL  
SQAGQGIALDLSSGYQNICQLGSAAVGENKLTLPDGDSESMMMMRGMTAKNFDPVRYSGRWFEVASLKRGFAGQ  
GQEDCHCTQGVTYTFDMKESAIRVDTFCVHGSPDGYITGIRGKVQCVGAEDLEKSETDLEKQEMIKKCFRFPPTIPI  
PKLPYVIATDYDNYALVSGAKDKGFVQVYSRTPNPGPEFIAKYKNYLAQFGYDPEKIKDTPQDCEVTDALAAMMSMP  
GMEQTLTNQFPDLGLRKSVDPFPTSVFETLKKLVPLYFK

>SbCHL

MVLVVLGCSPASPRPACTPNSRRRC SATRQKIIRCSLNEETLLSKHGVVSRQLISCLAASLVFVSPPSQAI PAETF  
PGLCQIATVA AIDNASVPLKFDNPSDDGSAGMMMRGMTAKNFDPVRYSGRWFEVASLKRGFAGQGQEDCHCTQGVY  
DEKRSIQVDTFCVHGGPDGYITGIRGRVQCLSEEDMSSAETDLERQEMIREKCFRFPPTLPFI PKEPYDVLATDY  
YAVVSGAKDTSFIQIYSRTPNPGPEFIEKYKSYANFGYDPSKIKDTPQDCEYMSSDQIALMMSMPGMNEALTNQFPD  
LKLKAPVALNPFPTSVFDTLKKLLELYFK

>OsCHL

MVLALLLGSSSSSLAAPHACSSRRKCRPAGRNNFRCSLHDKVPLNAHGVLSTKLLSCLAASLVFISPPCQAI PAETF  
VQPKLCQVAVVA AIDKAAVPLKFDSPDDGGTGLMMKGMTAKNFDPIRYSGRWFEVASLKRGFAGQGQEDCHCTQGVY  
SFDEKRSIQVDTFCVHGGPDGYITGIRGRVQCLSEEDMASAETDLERQEMIKGKCFRFPPTLPFI PKEPYDVLATDY  
DNYAVVSGAKDTSFIQIYSRTPNPGPEFIEKYKSYAANFGYDPSKIKDTPQDCEVMSTDQGLMMSMPGMTEALTNQF  
PDLKLSAPVAFNPFPTSVFDTLKKLLELYFK

>HvCHL

MALLPLVGFSPFPFPACPSRRTCGPASRMNFRCCVQERVPVRNDGISKHLLSCLAASLVFISTPSQAVPADTFARPS  
LCQVAVVA AIDKAAVPLKFDGSPDDGMMMTKGMTAKNFDPVRYSGRWFEVASLKRGFAGQGQEDCHCTQGVYTFDEK  
AGAIKVETFCVHGSPDGYITGIRGKVQCLSQEDMASAETDLEKEEMISSKCFRFPPTLPFI PKLPYDVLATDYDNYAV  
VSGAKDTSFIQIYSRTPNPGPEFIEKYKSYAAGFGYDPSKIKDTPQDCEVSSDQLAQMMSMPGMDEALTNQFPDLKLL  
SSVAFDPPTSVTQTLKKLELYFK

>InCHL

MASHNLFVAQSSPVLLPSHHPSKPRGVSGKMIVRCTLEQTAPSKARAKHLVSGLAASIVFLTQVNSVVAADLSYQNNI  
CQLASAADNLPSLPLDGGDDNGGMLMMMRGMTAKNFDPTRYAGRWFEEVASLKRGFAGQGQEDCHCTQGIYTFDVNAAA  
IQVDTFCVHGGPDGYITGIRGKVQCLSEDETLKTATDLEKQEMIKGKCYLRFPTLPFI PKEPYDVIATDYDNFAIVSG  
AKDKSFVQIYSRTPDPGPEFIEKYKAYLADFGYDPSKIKDTPQDCEVMSNSQLSAMMSMAGMQQALNNQFPELELKAP  
VAFNPFTSVFDTLKKLVELYFK

>StCHL

MFCYNLVAQQSPPILVQSQYPSKPRGLPVKVSACCTECPFRKVEVKHVISGLATSILCLSPSNMAFAADLPHYNSV  
FQLANVADSMPTLPLEKENDGGKLMMMRGMTAKDFDPIRYSGRWFEEVASLKRGFAGQGQEDCHCTQGIYTFVDMNAPAI  
QVDTFCVHGGPDGYITGIRGRVQCLNEEDKEKDETDLERQEMIREKCYLRFPTLPFI PKEPYDVIATDYDNFALVSGA  
KDKSFVQIYSRTPNPGPEFIEKYKNYLASFYDPSKIKDTPQDCEVKTTSQLSAMMSMSGMQQALNNQFPDLELRRPV  
QFNPFTSVFETLKKLAELYFK

>TaCHL

MALLPLLGSPPFPASRPARPSRRKCGPAARMNFRCSAEERAPVRNSGISKHVLSCLAASLLFISPPSQAVPADTFA  
RPSLCQVAVVAAIDKGAVPLKFDAPSDDAMMMTKGMTAKNFDPVRYSGRWFEEVASRKGGFAGQGQEDCHCTQGVYTF  
DEKAGAIKVFETFCVHGPSDGYITGIRGKVQCLSQEDMAGAETDLEREEMISSKCFLRFPPTLPFI PKLPYDVLATDYDN  
YAVVSGAKDTSFIQIYSRTPNPGPEFIEKYKSYAAGFGYDLSKIKDTPQDCEVSSDQLAEMMSMPGMDQALTNQFPDL  
KLKSSVAFDPFTSVTQTLKKLAELYFK

>GmCHL

MVELLLRASPPPHSSYLRCRTVSGRTLVKCSLEVPSKVLTKHVLSGLAASLIFISPANQTIAADLSRAPNNICQLA  
SASENAVTSPPFENEKGSNLMMMRGMTAKDFDVPVRYSGRWFEEVASLKRGFAGQGQEDCHCTQGVYTFDREAPSIQVDTF  
CVHGGPNGFITGIRGRVQCLSEEDLGKTETQLEKQEMIKEKCYLRFPTLPFI PKEPYDVIATDYDNFSLVSGAKDQSF  
IQIYSRTPNPGPEFIEKYKSYLANYGYPDSKIKDTPQDCEVMSNSQLAAMMSMSGMQQALTNQFPDLGLNAPIELNPF  
TSVFDLTKKLEPYFK

>SoCHL

GLCQIATVAAIDSASVTLKFDNPSDDGSAGMMMRGMTAKNFDPVRYSGRWFEEVASLKRGFAGQGQEDCHCTQGVYSFD  
EKSRSIQVDTFCVHGGPDGYITGIRGRVQCLSEEDMASAETDLERQEMIREKCFLRFPPTLPFI PKEPYDVLATDYDNY  
AVVSGAKDTSFIQIYSRTPNPGPEFIEKYKSYVANFGYDPSKIKDTPQDCEYMSDQIALMMSMPGMNEALTNQFPDL  
KLKAPVALNPFTSVFDTLKKLLELYFK

## Violaxanthin De-Epoxidases

>AtvDE

MAVATHCFTSPCHDRIRFFSSDDGIGRLGITRKRINGTFLKILPPIQSADLRTTGGRSSRPLSAFRSGFSKGI FDI V  
PLPSKNELKELTAPLLLKLVGLACAFLIVPSADAVDALKTACLLKGRIELAKCIANPACAANVACLQTCNNRPDE  
TECQIKCGDLFENSVDDEFNECAVSRKCVPRKSDLGEFPAPDPSVLVQNFNISDFNGKWYITSGLNPTFDAFDCQLH  
EFHTEGDNKLVGNI SWRIKTLDSGFFTRSAVQKQFVQDPNPGVLYNHDNEYLYHYQDDWYILSSKIENKPEDYIFVYYR  
GRNDAWDGYGGAVVYTRSSVLPNSIIPELEKAAKSIGRDFSTFIRTDNTCGPEPALVERIEKTVEEGERIIVKEVEEI  
EEVEVEKEVGRTEMTLQRLAEGFNEKQDEENFVRELSKEEMEFLEIKMEASEVEKLF GKALPIRKVR

>NtvDE

MALAPHSNFLANHETIKYYVGSKLPGHKRFSWGWEYDFGSIVVAKICSSRRI PRYFRKSPRICGLDSRGLQLF SHGK  
HNLSPAHSINQNPVPGNSGCKFPKDVALMVWEKQGFAKTAIVAI FILSVASKADAVDALKTCTCLLKECRLELAKCI  
SNPACAANVACLQTCNNRPDETECQIKCGDLFENSVDDEFNECAVSRKCVPRKSDVGDFPVPDPSVLVQKFDKDF S  
GKWFITRGLNPTFDAFDCQLHEFHTEENKLVGNI SWRI RTPDGGFFTRSAVQKQFVQDPKYPGILYNHDNEYLYHYQDDW  
YILSSKVENSPEDYIFVYYKGRNDAWDGYGGSVLYTRSAVLPESIIPELQTAQKVGRDFNTFIKTDNTCGPEPLVE  
RLEKKVEEGERTIIKEVEEIEEEVEKVRDKEVTFLSKLFEGFKELQRDEENFLRELSKEEMDVL DGLKMEATEVEKLF  
GRALPIRKL R

>OsVDE\_jap

MAARPEVVSALSPPAGGGAMGGVRYHRCCPPRAYLWRKGDHPLHAKI SARCSEIKAHTVLQGS DALSSIREWSRSH  
LVTMTGLVACAVLVPSADAVDALKTCTCLLKECRIELAKCIANPSCAANVACLNTCNNRPDETECQIKCGDLFENTV



VDEFNECAVSRKKCVQKSDVGEFPVDPSPALVKNFNMADFNKGWYISSGLNPTFDTFDCQLHEFRVEGDKLIANLWT  
RIRTPDSGFFTRTAIQRFVQDPAQPAILYNHDNEFLHYQDDWYIISSKVENKEDDYIFVYYRGRNDAWDGYGGAVLYT  
RSKVVPEIVPELERAAKSVGRDFSTFIRTDNTCGPEPPLVERIEKTVEQGEKTIIREVQEIIEGEIEGEVKELEEEEEV  
TLFKRLTDGLMEVKQDLNMFQGLSKEEMELLDQMNMEATEVEKVFSRALPIRKLK

>OsVDE\_ind

MAARPEVVSALSPAGGGAMGGVRYHRCCPPRAHLWRKGDHPLPHHAKIPARCSEIKVHTVLQASDALSTREWSRSH  
LVTMTGLVACAVLVPSADAVDALKTCTCLLKECRIELAKCIANPSCAANVACLNTCNRPDETECQIKCGDLFENTV  
VDEFNECAVSRKKCVQKSDVGEFPVDPSPALVKNFNMADFNKGWYISSGLNPTFDTFDCQLHEFRVEGDKLIANLWT  
RIRTPDSGFFTRTAIQRFVQDPAQPAILYNHDNEFLHYQDDWYIISSKVENKEDDYIFVYYRGRNDAWDGYGGAVLYT  
RSKVVPEIVPELERAAKSVGRDFSTFIRTDNTCGPEPPLVERIEKTVEQGEKTIIREVQEIIEGEIEGEVKELEEEEEV  
TLFKRLTDGLMEVKQDLNMFQGLSKEEMELLDQMNMEATEVEKVFSRALPIRKLK

>CsVDE

MALSAHLIYLSNDGSI GLCARRQLTCERLRRRVADPCCVVNVKMQPNNRI PKYFGLLSYRMPGCGLESKYSNLLSCGS  
MKISSVCENSTSIPEEKGI FEFQMEVIMSVLKSQ LIRVAVMACIFLVI PAADAVDALKTCSRLLKECGVELAKCIAN  
PSCAANVACLQACNNRPDETECQIKCGDLFENSVDVDEFNECAVSRKKCVQKSDVGEFPVPHPNVLRNFMKDFSGK  
WFITISGLNPTFDAFDCQLHEFHMESNKLLGNSTWRIRTPDGGFFTRSAVQRFVQDPTQPAILYNHDNEYLHYQDDWYI  
LSSKIENKPDYV FVYYRGRNDAWDGYGGAVVYTRSAVLPNSI IPELEKAAQSVGRDFSKFIRTDNSCGPEPPLVERL  
EKTVEEGERTI IREVEEIEGEVEKTEMNLFGRLLLEGFKELQQDEENFLRELSKEEMDI LSELKMEASEVEKLFQALP  
LRKLK

>SoVDE

MALVARSICVSYDEIAGICNNVSHRNFKKWVQWKNPFLQDDARNIRFNDRKLSCTKFIGASEKLQHSKSPKSGLIS  
CGWEVNSSKVVSNAPIPKWNLLKLVVEVTAIVACTFFVMSSAQAVDALKTCTCLLKECRIELAKCIANPSCAANVA  
CLQTCNNRPDETECQIKCGDLFANKVVDEFNECAVSRKKCVQKSDVGEFPVDPSPVLVKSFNMAFNGKWFISSGLN  
PTFDAFDCQLHEFHLEDGKLVGNLSWRIKTPDGGFFTRTAVQKFAQDPSQPGMLYNHDNAYLHYQDDWYI LSSKIENQ  
PDYV FVYYRGRNDAWDGYGGAFLYTRSATVPENIVPELNRAAQSVGKDFNKFIRTDNTCGPEPPLVERLEKTVEEGE  
RTI I KEVEQLEGEIEGDLEKVGKTEMTLFQRLLEGFQELQKDEEYFLKELNKEERELLEDLKMEAGEVEKLFGRALP  
RKLK

>TaVDE

MLPRQCFKHVFPAGSSSSILHGPGSRGAGSRGRITLNFHRCCVRASLWRDHLHISTARSSEIKVHTLLQVPDVFNT  
IKSWSKLQLVTVTGLAACVLLVPSAGATDALKTCTCLLKECRIELAKCIANPSCAANVACLNTCNRPDETECQIKC  
GDLFENSVDVDEFNECAVSRKKCVPKSDVGEFPVDPSPALVKNFNMADFRGKWISSGLNPTFDTFDCQLHEFRLEGD  
RLVANLAWRIPTPDTGFFTRGAVQRFVQDSSQPAILYNHDNEYLHYQDDWYI LSSKIENKDDYIFVYYRGRNDAWDG  
YGGAVVYTRSKELPETIVPELERATKSVGRDFSTFIRTDNTCGAEPPLADRIERTVEKGEKLI VDEVKEIEGEIEGEV  
KELEREEETLVKRLADGIMEVKQDVMNMFQGLSKEEMEILDQLNLEATEVEELFSRSLPIRKLK

>LsVDE

MALSHTVFLCKEEALNLYARSPCNERFHRSQPPTNIIMKIRSNNGYFNSFRLFTSYKTSSFSDSSHCKDKSQICS  
IDTSFEEIQRFDLKRGMTLILEKQWRQFIQLAIVLVCTFVIVPRVDAVDALKTCACLLKECRIELAKCIANPSCAANV  
ACLQTCNNRPDETECQIKCGDLFENSVDVDEFNECAVSRKKCVPRKSDVGEFPVDPDRNAVQNFNMKDFSGKWIITSG  
NPTFDAFDCQLHEFHMEKLVGNLTWRITLDGGFFTRSAVQTFVQDPLPGALYNHDNEFLHYQDDWYI LSSQIEN  
KPDYIFVYYRGRNDAWDGYGGSVIYTRSP TLPESI I PNLQKAQSVGRDFNFIITDNTNSCGPEPPLVERLEKTAEEG  
EKLLIKEAVEIEEEVEKEVEKVRDTEMTLFQRLLEGFQELQKDEENFVRELSKEEKEILNELQMEATEVEKLFGRALP  
IRKLK

>HsVDE

MLSRQCFKHVFPAGSSSSILHGPGSRGAASRSRTALNFHRCCVRASLWRADHLNIRTAGSSEVKVYTSLQVPDVFNS  
IKSWSKLQLVTVTGLAACVLLVPSAGATDALKTCTCLLKECRIELAKCIANPSCAANVACLNTCNRPDETECQIKC  
GDLFENSVDVDEFNECAVSRKKCVPKSDVGEFPVDPSSALVKNFNMADFTGKWISSGLNPTFDTFDCQLHEFRVEG  
DRLVANLAWRIPTPDTGFFTRGAVQRFVQDPSQPAILYNHDNEYLHYQDDWYI LSSKIENKEDDYIFVYYRGRNDAWD  
GYGGAVVYTRSKELPETIVPELERAQSVGRDFSTFIRTDNTCGAEPPLADRIERTVEKGEKLI VDEVKEIEGEIEGE  
VKELEREEETLVKRLADGIMEVKQDVMNMFQGLSKEEMEILDQLNLEATEVEELFSRSLPIRKLK

## Zeaxanthin Epoxidases

>AtZEP\_col

MGSTPFCYSINPSPSKLDFTRTHVFSVPSKQFYLDLSSFSGKPGGVSGFRSRRALLGVKAATALVEKEEKREAVTEKK  
KKSRLVAVAGGGIGGLVFALAAKKKGFVLFVEKDLASAIRGEGKYRGPIQIQSNALAALEAIDIEVAEQVMEAGCITGD  
RINGLVDGISGTWYVKFDTFTTAAASRGLPVTRVISRMTLQQILARAVGEDVIRNESNVVDFEDSGDKVTVVLENGQRY  
EGDLLVGADGIWSKVRNNLFGRSEATYSGYTCYTGIADFIPADIESVGYRVFLGHKQYFVSSDVGGGKMOWYAFHEEP  
AGGADAPNGMKKRLFEIFDGWCDNVLDLLHATEEEAILRRDIYDRSPGFTWGKGRVTLGDSIHAMQPNMGQGGCMAI  
EDSFQLALELDEAWKQSVETTTVPDVVSSLKRYEESRRLRVAI IHAMARMAAIMASTYKAYLGVGLGPLSFLTFRVP  
HPGRVGGRRFFVDIAMPMSLDWVLGGNSEKLGRRPPSCLTDKADDRLEWFEDDDALERTIKGEWYLI PHGDDCCVSE  
TLCLTKDEDQPCIVGSEPDQDFPGMRIVI PSSQVSKMHARVIYKDGAFFLMDLRSEHGTYVTDNEGRRYRATPNFPAR  
FRSSDIEFGSDKKAARVVKVIRKTPKSTRKNESNNDKLLQTA

>AtZEP\_ler

MGSTPFCYSINPSPSKLDFTRTHVFSVPAKQFYLDLSSFSGRSGGLSVFRSRKTLGVAATALVEKEEKREAVTEK  
KKSRLVAVAGGGIGGLVFALAAKKKGFVLFVEKDLASAIRGEGKYRGPIQIQSNALAALEAIDIEVAEQVMEAGCITGD  
RINGLVDGISGTWYVKFDTFTTAAASRGLPVTRVISRMTLQQILARAVGEDVIRNESNVVDFEDSGDKVTVVLENGQRY  
EGDLLVGADGIWSKVRNNLFGRSEATYSGYTCYTGIADFIPADIESVGYRVFLGHKQYFVSSDVGGGKMOWYAFHEEP  
AGGADAPNGMKKRLFEIFDGWCDNVLDLLHATEEEAILRRDIYDRSPGFTWGKGRVTLGDSIHAMQPNMGQGGCMAI  
EDSFQLALELDEAWKQSVETTTVPDVVSSLKRYEESRRLRVAI IHAMARMAAIMASTYKAYLGVGLGPLSFLTFRVP  
HPGRVGGRRFFVDIAMPMSLDWVLGGNSEKLGRRPPSCLTDKADDRLEWFEDDDALERTIKGEWYLI PHGDDCCVSE  
TLCLTKDEDQPCIVGSEPDQDFPGMRIVI PSSQVSKMHARVIYKDGAFFLMDLRSEHGTYVTDNEGRRYRATPNFPAR  
FRSSDIEFGSDKKAARVVKVIRKTPKSTRKNESNNDKLLQTA

>AtZEP\_?

MGSTPFCYSINPSPSKLDFTRTHVFSVPSKQFYLDLSSFSGKPGGVSGFRSRRALLGVKAATALVEKEEKREAVTDKK  
KKSRLVAVAGGGIGGLVFALAAKKKGFVLFVEKDLASAMRGEKGYRGPIQIQSNALAALEAIDIEVAEQVMEAGCITGD  
RINGLVDGISGTWYVKFDTFTTAAAGVTGLPVTRVISRMTLQQILARAVGEDVIRNESNVVDFEDSGDKVTVVLENGQRY  
EGDLLVGADGIWSKVRNNLFGRSEATYSGYTCYTGIADFIPADIESVGYRVFLGHKQYFVSSDVGGGKMOWYAFHEEP  
AGGADAPNGMKKRLFEIFDGWCDNVLDLLHATEEEAILRRDIYDRSPGFTWGKGRVTLGDSIHAMQPNMGQGGCMAI  
EDSFQLALELDEAWKQSVETTTVPDVVSSLKRYEESRRLRVAI IHAMARMAAIMASTYKAYLGVGLGPLSFLTFRVP  
HPGRVGGRRFFVDIAMPMSLDWVLGGNSEKLGRRPPSCLTDKADDRLEWFEDDDALERTIKGEWYLI PHGDDCCVSE  
TLCLTKDEDQPCIVGSEPDQDFPGMRIVI PSSQVSKMHARVIYKDGAFFLMDLRSEHGTYVTDNEGRRYRATPNFPAR  
FRSSDIEFGSDKKAARVVKVIRKTPKSTRKNESNNDKLLQTA

>CuZEP

MVSSMFYNSVNLSTAVFSRTHFPVPVYKHSCIEFSRYDHCINYKFRGTGTSQSKNPTQMKAAVAESPTNNSDSENKKL  
RILVAGGGIGGLVFALAAKRKGFVLFVEKDSAIRGEGQYRGPIQIQSNALAALEAIDLVAEEVMRAGCVTGDRIN  
GLVDGISGSWYIKFDTFTTAAEKGLPVTRVISRMTLQQILAKAVGDEIILNESNVIDFKDHGDKVSVVLENGQCYAGD  
LLIGADGIWSKVRKNLFGPQEAISYGYTCYTGIADFVPADIESVGYRVFLGHKQYFVSSDVGAGKMOWYAFHKEPAGG  
VDDPEGKKERLLKIFEGWCDNVVDLILATDEEAILRRDIYDRTPIFTWGRGRVTLGDSVHAMQPNLGQGGCMAIEDG  
YQLAVELEKACKKSNESKTPIDIVSALKSYERARRLRVAIHGLARSAAVMASTYKAYLGVGLGPLSFLTFRIPHPG  
RVGGRFFIDLAMPLMLSWVLGGNSSKLEGRSPCKLSDKASDNLRTWFRDDDALERAMNGEWFLVPSGSENVVSQPIY  
LSGSHENEPYLIGSESHEDFPRTSIVIPSAQVSKMHARISYKDGAFYILDLQSEHGTYVTDNEGRRYRVSSNFPARFR  
PSDIEFGSDKKAIFRVKVIPTPPNNNSERKEAGEILQAV

>CrZEP

MLASTYTPCGVRQVAGRTVAVPSSLVAPVAVARSGLAPYVPVCEPSAALPACQQPSGRRHVQTAATLRADNPSSVAQ  
LVHQNGKGMKVI IAGAGIGGLVLAVALLKQGFQVQVFERDLTAIRGEGKYRGPIQVQSNALAALEAIDPEVAEVLRE  
GCITGDRINGLCDGLTGWEYVKFDTFHPAVSKGLPVTRVISRMTLQQILAKAVERYGGPGTIQNGCNVTEFTERRNDT  
TGNNEVTVQLEDGRTFAADVLVGADGIWSKIRKQLIGETKANYSYTCYTGISDFTPADIDIVGYRVFLGNGQYFVSS  
DVGNKGMOWYGFHKEPSGGTDPEGSRKARLLQIFGHWNNDNVDLIKATPEEDVLRDDIFDRPPIFTWSKGRVALLGDS  
AHAMQPNLGQGGCMAIEDAYELAILDSRAVSDKAGNAAVDVEGVLSYQDSRI LRVS AIHGMAGMAAFMASTYKCYL  
GEGWSKWVEGLRIPHPGRVGRVLMMLTMPVLEWLVGGNTDHSVPHRTSYCSLGDKPKAFPESRFPEFMNNDASIR  
SSHADWLLVAERDAATAAANVNAATGSSAAAAAADVNSSCQCKGIYMAADSAALVGRCGATSRPALAVDDVHVAESH  
AQVWRGLAGLPPSSSASTAAASASAASSAASGTASTLGSSEGYWLRDLGSGRGTWVNGKRLPDGATVQLWPGDAVEF  
GRHPSHEVFKVMQHVTLRSDELSGQAYTTLVMVGKIRNNNDYVMPESRPDGGSQQPGRLVTA

>CspZEP

MHARSSLGPRARAGARAPAVCHVAALAACRPAASTPPQPLCATISNSAGSARAAIMPQQGRGLGSLVRCPTTPVATR  
ASSVASAPASQPPAADSMKRPLRVLIAGAGIGGLVLAVALIKKGFHVTVFERDMTAIRGEGKYRGP IQIQSNALGALE  
AIDPSIADEVMDGECITGDRVNGLCDGVTGDWYVKFDTFHPAVSKGLPVTRVISRVTLQNILAKAVLRYGGPDTIMSN  
SHVVGFEESNNGVSVTLENGDVHRGDI LVGADGIWSKIRKAILGETEANYSQYTCYTGISDFTPADIDIVGYRVFLGN  
SQYFVSSDVGGGKMOWYGFHKEPAGGTDPEGQRKARLLDIFGHWNDNVVDLIKATPEEDIMRRDIFDRPPVFKWSEGR  
TVLLGDSVHAMQPNLGQGGCMAIEDAYELANNLSDGMDAAGQQPAHLVDVKKAFSTYQSHRMIRASAIHGMAGMAAFMA  
STYKAYLGEGLPGPLQQLTKLKIHPGRVVGRLVMNLTMPQVLGWVLGGNTENLDKSRVGHCRDIADQPKAFHESQFSY  
LMENDEAI IQSSHADWMLMTSREAGSGSSDSNARVDATADATSTSECKGIYIGDEPSI IGRKSESADLSINDGQVAPQ  
HARVWRTETSSVSGRDVVAYEYHVQDLGSDAGTWLNGRPMRGGTCQLHAGDVLEFGQSPSKEVYRVKMQHVSLRNDK  
LNGHAFTTLVVGAHEGHGDKHMIMA

>LeZEP

MYSTVFYTSVHPSTSVLSRKQLPLLI SKDFSAELYHSLPCRSLENGHINKVKGVKVKATIAEAPVTPTEKTDSGANGD  
LKVPQKKLVVAGGGIGGLVFALAAKRGFDVLVFERDLSAIRGEGQYRGP IQIQSNALAALEAIDLVAEDIMNAG  
CITGQRINGLVDG I SGNWYCKFDTFTPAVERGLPVTRVISRMTLQQILARAVGEEI IMNESNVVDFEDDGEKVTVVLE  
NGQRFRTGDLVVGADGIRSKVRTNLFPGPSEATYSGYTCYTGIADFVPADIDTVGYRVFLGHKQYFVSSDVGGGKMOWYA  
FYNEPAGGADAPNGKKERLLKIFGGWCDNVIDLLVATDEDAILRRDIYDRPPTFSWGRGRVTLLGDSVHAMQPNLGQG  
GCMAIEDSYQLALELEKACSRSAEFGSPVDI ISSLRSYESARKLRVGV I HGLARMAAIMASTYKAYLVGLGPLSFLT  
QYRIPHPGRVGGRFVIDLGMPLMLSWVLGGNGDKLEGRIKHCRLSEKANDQLRKWFEDDDALERATDAEWLLL PAGNG  
SSGLEAIVLSRDEDVPCVTGSI SHTNIPGKSVIPLPQVSEM HARISCKDGAFFVTDLRSEHGTWVTDNEGRRYRTSP  
NFPTRFHPSDVIIEFGSDKAAFRVKAMKFP LKT SERKEEREAVEAA

>NtZEP

MYSTVFYTSVHPSTSAFSRKQLPLLI SKDFPTELYHSLPCRSLENGQIKKVKGVKVKATIAEAPATI PPTDLKVKVPQK  
KLKVLVAGGGIGGLVFALAAKRGFDVLVFERDLSAIRGEGQYRGP IQIQSNALAALEAIDMDVAEDIMNAGCITGQR  
INGLVDGVSNGWYCKFDTFTPAVERGLPVTRVISRMTLQQNLARAVGEDI IMNESNVVNFEDDGEKVTVTLEDGQQYT  
GDLLVGADGIRSKVRTNLFGPSDVYSGYTCYTGIADFVPADIE TVGYRVFLGHKQYFVSSDVGGGKMOWYAFHNEPA  
GGVDDPNGKARLLKIFEGWCDNVIDLLVATDEDAILRRDIYDRPPTFSWGKGRVTLLGDSVHAMQPNLGQGGCMAIE  
DSYQLALELDKALSRSASGTPVDI ISSLRSYESSRKL RVGV I HGLARMAAIMASTYKAYLVGLGPLSFLT KFRIPH  
PGRVGGRRFFIDLGMPLMLSWVLGGNGEKLEGRIQHCR LSEKANDQLRNWFEDDDALERATDAEWLLL PAGNSNALET  
LVLSRDENMPCNIGSVSHANIPGKSVIPLPQVSEM HARISYKGGAFFVTDLRSEHGTWITDNEGRRYRASPNFPTRF  
HPSDIEFGSDKAAFRVKVMKFP PKTAAKEERQAVGAA

>NpZEP

MYSTVFYTSVHPSTSAFSRKQLPLLI SKDFPTELYHSLPCRSLENGQIKKVKGVKVKATIAEAPATI PPTDLKVKVPQK  
KLKVLVAGGGIGGLVFALAAKRGFDVLVFERDLSAIRGEGQYRGP IQIQSNALAALEAIDMDVAEDIMNAGCITGQR  
INGLVDGVSNGWYCKFDTFTPAVERGLPVTRVISRMTLQQNLARAVGEDI IMNESNVVNFEDDGEKVTVTLEDGQQYT  
GDLLVGADGIRSKVRTNLFGPSDVYSGYTCYTGIADFVPADIE TVGYRVFLGHKQYFVSSDVGGGKMOWYAFHNEPA  
GGVDDPNGKARLLKIFEGWCDNVIDLLVATDEDAILRRDIYDRPPTFSWGKGRVTLLGDSVHAMQPNLGQGGCMAIE  
DSYQLALELDKALSRSASGTPVDI ISSLRSYESSRKL RVGV I HGLARMAAIMASTYKAYLVGLGPLSFLT KFRIPH  
PGRVGGRRFFIDLGMPLMLSWVLGGNGEKLEGRIQHCR LSEKANDQLRNWFEDDDALERATDAEWLLL PAGNSNALET  
LVLSRDENMPCNIGSVSHANIPGKSVIPLPQVSEM HARISYKGGAFFVTDLRSEHGTWITDNEGRRYRASPNFPTRF  
HPSDIEFGSDKAAFRVKVMKFP PKTAAKEERQAVGAA

>OsZEP

MALLSATAPAKTRFSLFSHEEAQHPPHALSACCGGGASGKRQRARARVAAAMRPADAAASVAQAASPGGGGEGTRRP  
RVLVAGGGIGGLVLALAAARRKGYEVTVFERDMSAVRGEQYRGP IQIQSNALAAALAAIDMSVAEEVMREGCVTGDRIN  
GLVDG I SGSWYIKFDTFTPAERGLPVTRVISRMTLQQILARAVGDDAILNDSHVVD FID DGNKVTAIL EDGRKFE  
LLVGADGIWSKVRKVLFGQSEATYSEYTCYTGIADFVPPDIDTVGYRVFLGHKQYFVSSDVGAGKMOWYAFHKEPAGG  
TDPENGNKRLLEIFNGWCDNVDLINATDEEAILRRDIYDRPPTFNWGKGRVTLLGDSVHAMQPNLGQGGCMAIEDG  
YQLAVELEKSWQESAKSGTPMDIVSSLRRYEKERILRVSVIHGLARMAAIMATTYRYPYLVGLGPLSFLT KLRI PHPG  
RVGGRRFFIKYGMPLMLSWVLGGNSTKLEGRPLSCLSDKANDQLRRWFEDDDALEQAMGGEWYLLPTSSGDSQPIRLI  
RDEKKSLSIGSRSDPSNSTASLALPLPQI SENHATITCKNKAFYVTDNGSEHGTWITDNEGRRYRRTSELPCFPFSLG  
CH

>PaZEP

MASTLFYNSMNL SAAVFSRTHFPI PINKDFPLEFSPCIHTDYHLRSRTRSGQKKCLTEVRATVASPTEVPSAPASTQP  
KKLRILVAGGGIGGLVFALAAKKKGFVVFVKDL SAVRGEQYRGPIQIQSNALAALEAIDMDVAEEVMRVGCVTGD  
RINGLVDGVS GTWYVKFDFTTPAVERGLPVTRVISRIALQQILARAVGEEII INDSNVVNFEDLGDKVNVILENGQRY  
EGDMLVGADGIWSKVRKNLFGLEAVYSGYTCTYGIADFPADINSVGYRVFLGHKQYFVSSDVGGGKMQWYAFHKES  
PGGVDS PNGKKERLLKIFEGWCDNVIDLLLATEEDAILRRDIYDRTPILTGWKGHVTL LGDSVHAMQPNMGQGGCMAI  
EDGYQLALELDKAWKKSSETGTPVDVASSLSYENSRRLRVAIIHGMARMAALMASTYKAYLGVGLGPLSFLTFRIP  
HPGRVGGRVFIDKAMPLMLSWVLGGNSSKLEGRSPSCR LSKASDQLRNWFEDDDALERAIDGEWYLI PCGQDNDSQ  
LICLN RDEKNPCIIGSAPHGDVSGISIAIPKPQVSEMHARISYKDGAFYLTDLRSEHGTWIADIEGKRYRVPPNFPAR  
FRPSDAIEIGSQKVAFRVKVMKSSPGSVEKEGILQAA

>CaZEP

MYASSARDGIPGKWCNARRKQLPLLLISKDFPAELYHSLPCKSLENGHIKKVKGVKATLAEAPATPTEKSNSEVPQKKL  
KVLVAGGGIGGLVFALAGKKRGFDVLFERDISAIRGEGQYRGPIQIQSNALAALEAIDMDVAEEIMNAGCITGQRIN  
GLVDGISGNWYCKFDFTTPAVERGLPVTRVISRMTLQQILARLQGEDVIMNESHVVNFADDGETVTVNPELCQQYTGD  
LLVGADGIRSKVRTNLFGPSELTYSGYTCTYGIADFPADIDTAGYRVFLGHKQYFVSSDVGGGKMQWYAFHNEPAGG  
VDAPNGKKERLLKIFGGWCDNVIDLSVATDEDAILRRDIYDRPPTFSWGKGRVTL LGDSVHAMQPNLGQGGCMAIEDS  
YQLALELEKAWRSASAESGSPMDVISSLRSYESARKLRVGVIIHGLARMAAIMASAYKAYLGVGLGPLSFITFRIPHPG  
RVGGRFFIDLGMPMLMSWVLGGNGEKLEGRIQHCR LSEKANDQLRNWFEDDDALERATDAEWLLL PAGNSNAALETLV  
LSRDENMPCTIGSVSHANIPGKSVVILPSQVSDMHARISYNGGAFLGTAFRSDHGTWFI DNEGRRYRVSPNFPMRFHS  
SDVIVFGSDKAAFRIKAMKFAPKTAAKEDRQAVGAA
